# Supplementary material
Source: publisher figshare collection journal article supplement (https://frontiersin.figshare.com/ndownloader/files/24980297)
Supplement: Supplementary file [file 24980297]

Supplementary Figure 1. Effect of bacterial lysates on CAL27 proliferation (counting)

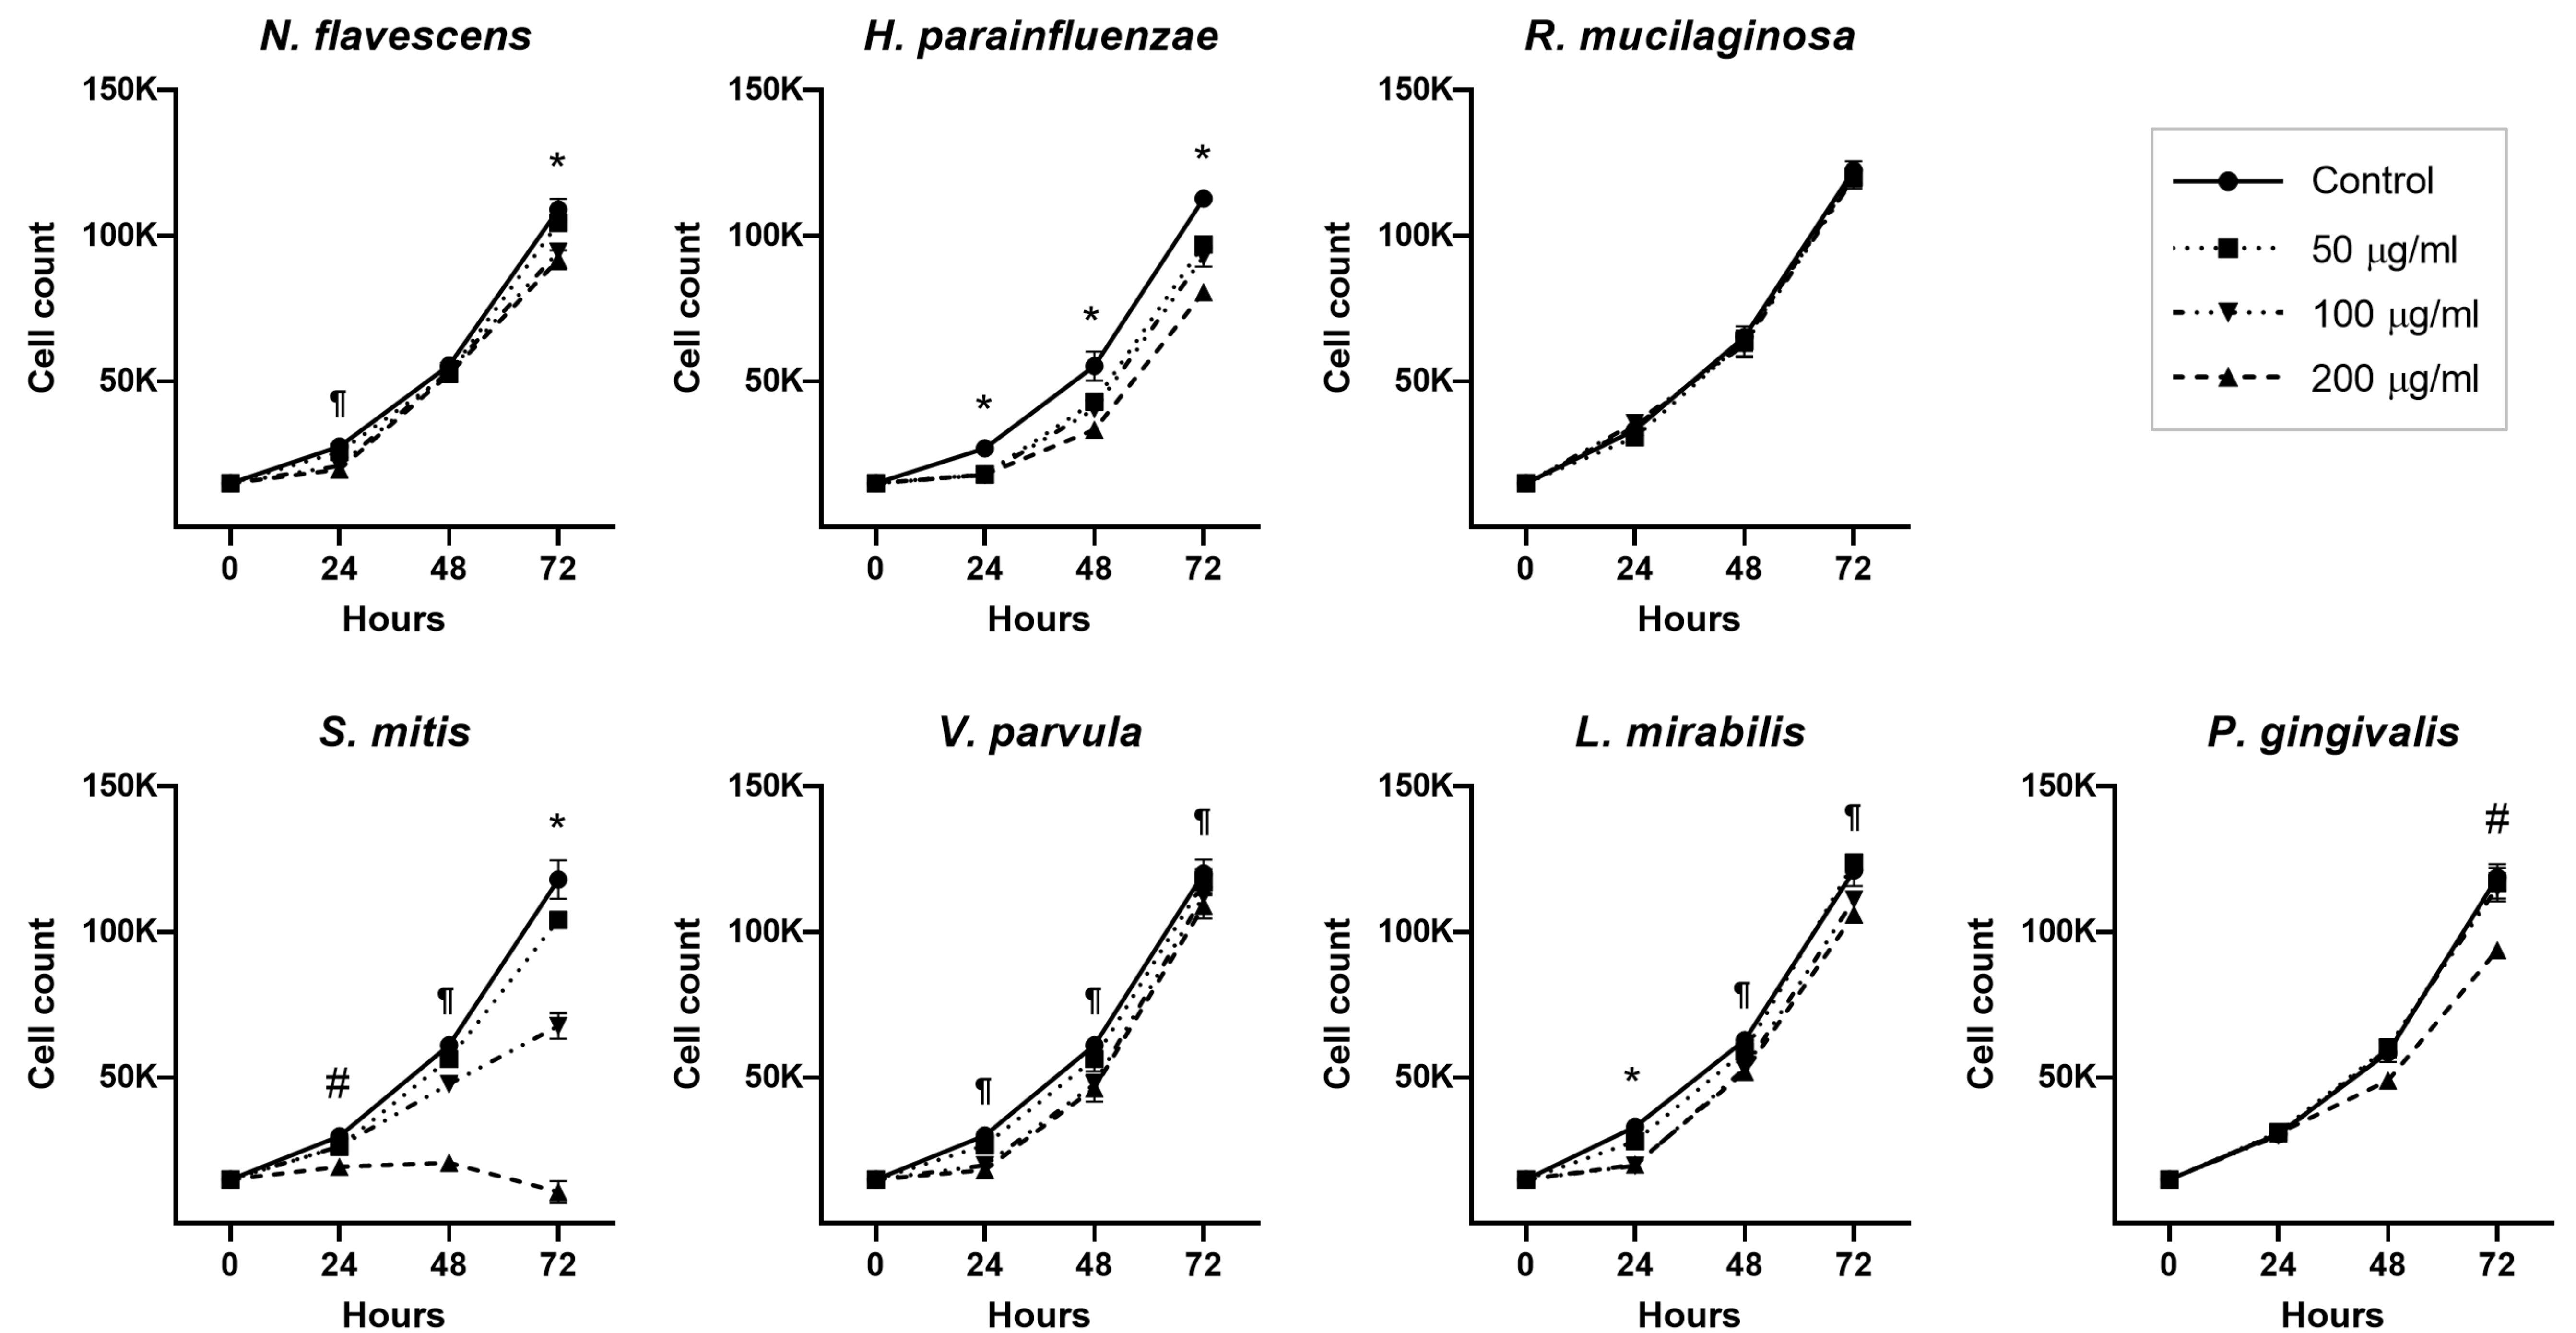

Significant difference for \* all concentrations; ¶ 100 and 200 µg/ml; # 200 µg/ml; § 50 µg/ml ; ^ 100 µg/ml; v 50 and 100 µg/ml; \$ 50 and 200 µg/ml

Supplementary Figure 2. Effect of bacterial lysates on SCC25 proliferation (counting)

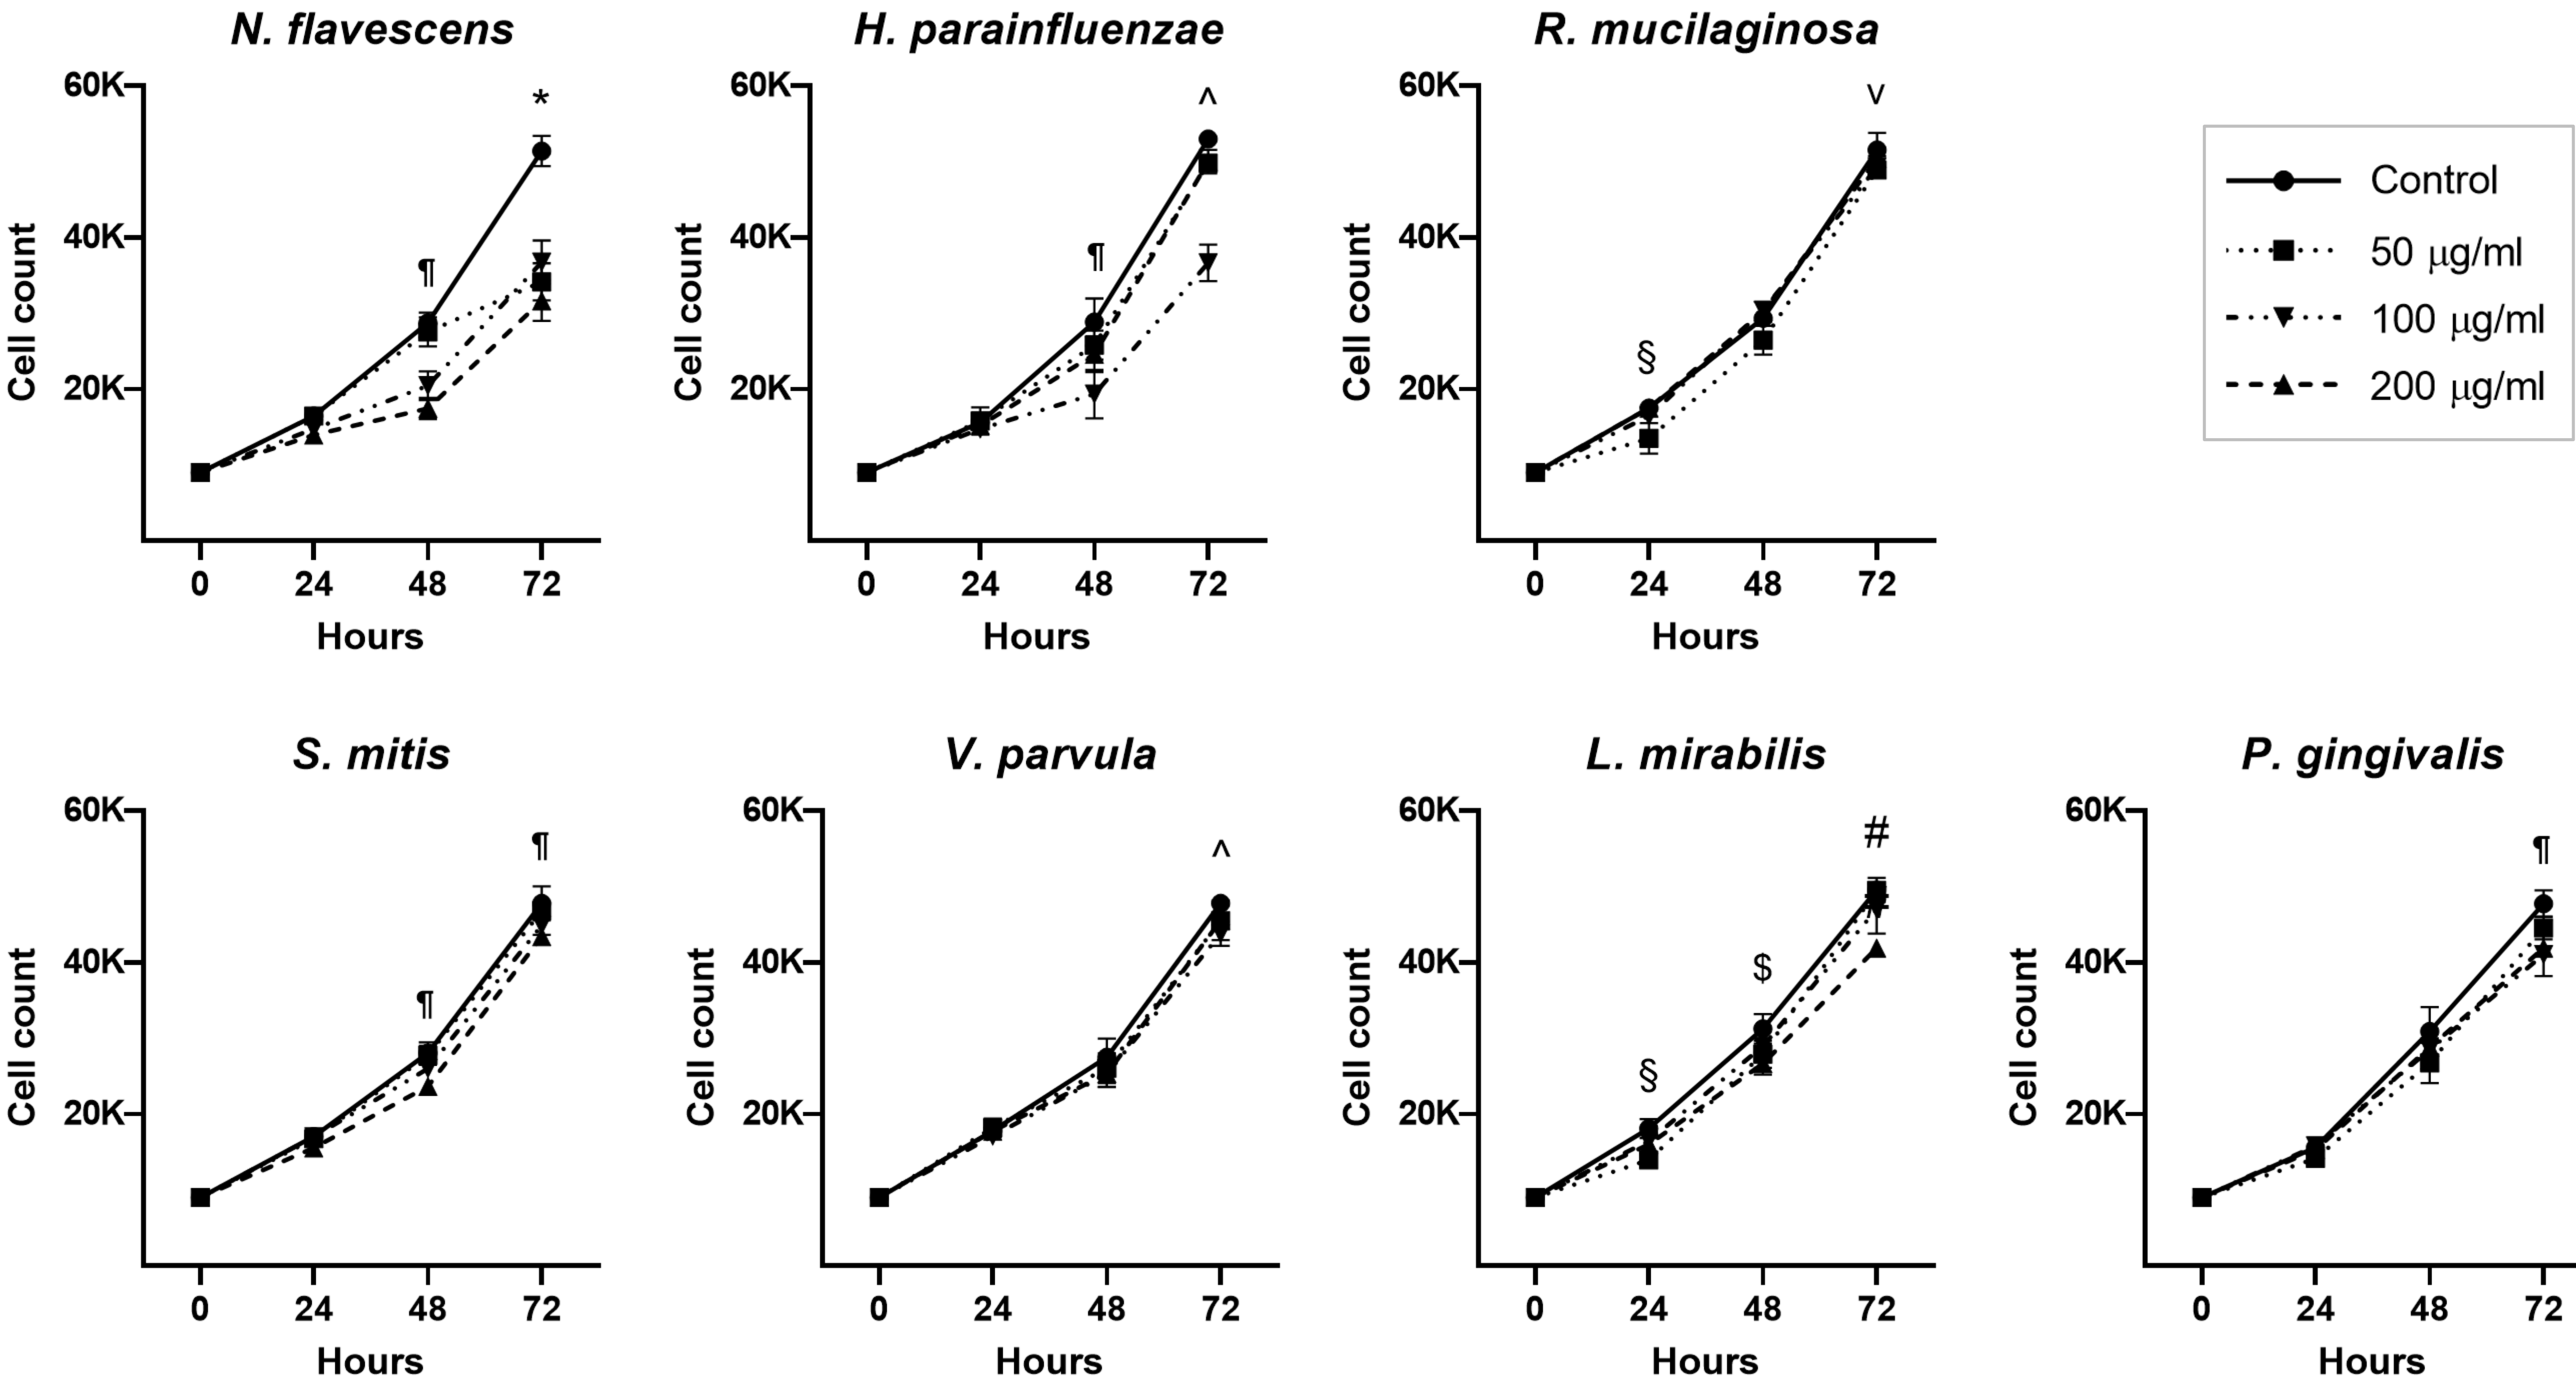

Significant difference for \* all concentrations; ¶ 100 and 200 µg/ml; # 200 µg/ml; § 50 µg/ml ; ^ 100 µg/ml; v 50 and 100 µg/ml; \$ 50 and 200 µg/ml

Supplementary Figure 3. Effect of bacterial lysates on SCC4 proliferation (counting)

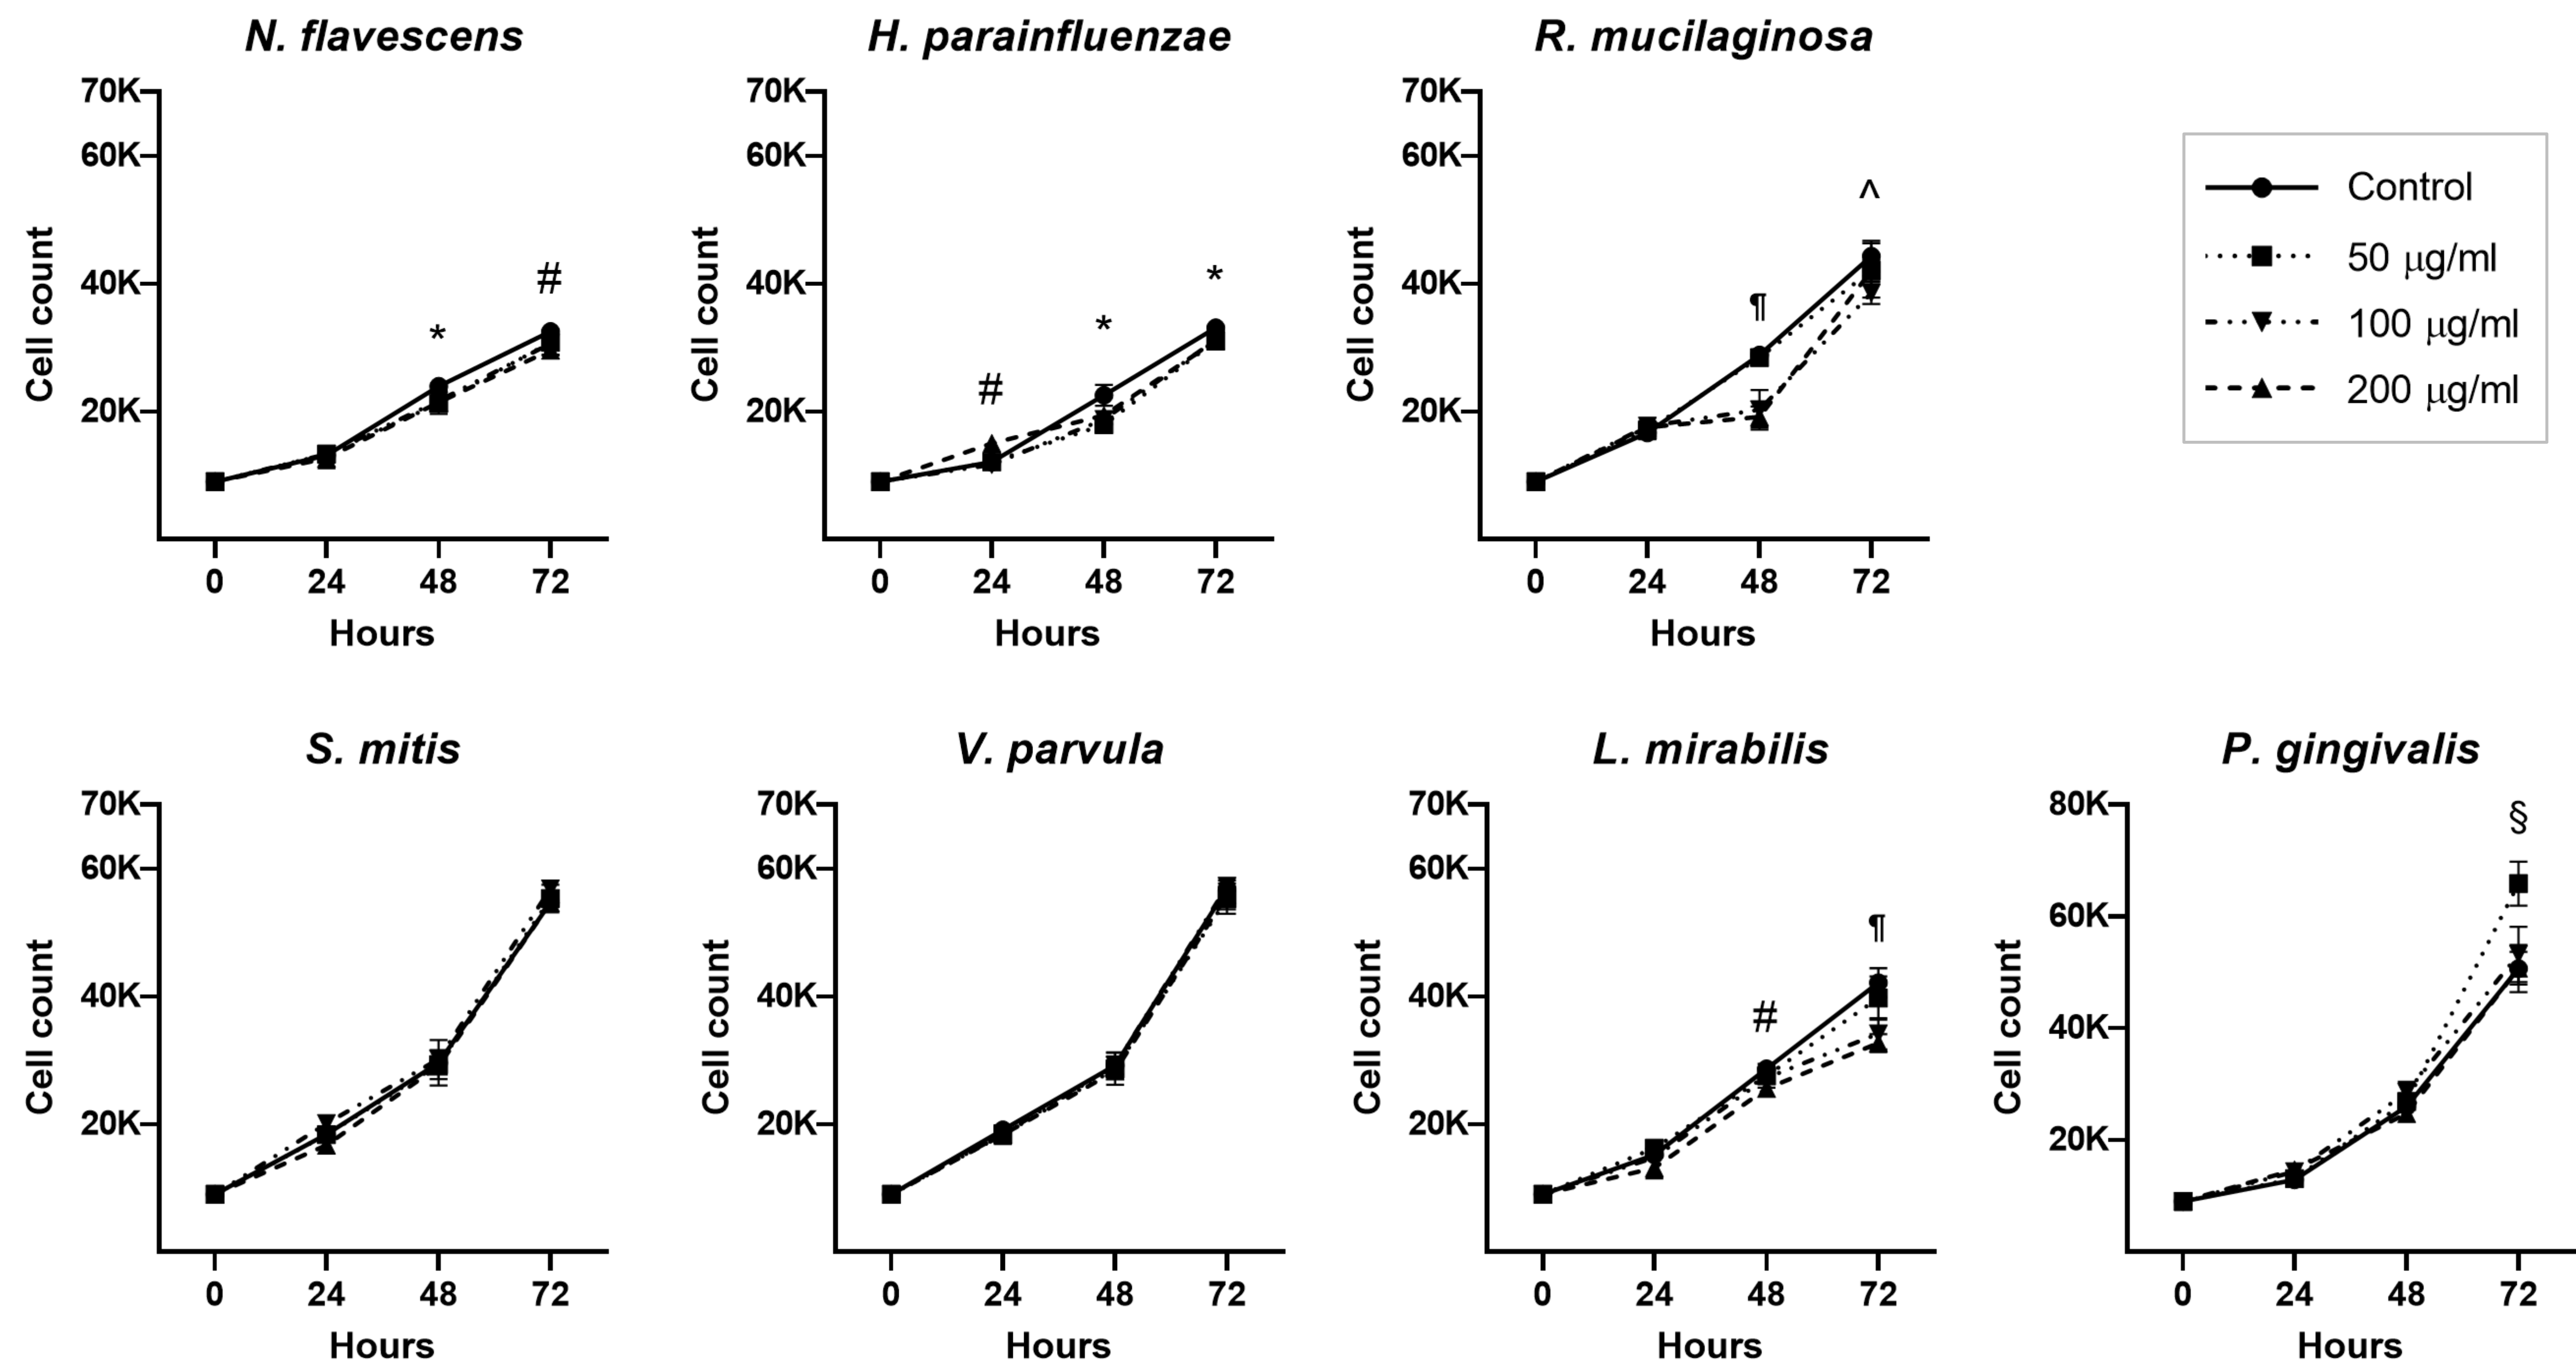

Significant difference for \* all concentrations; ¶ 100 and 200 µg/ml; # 200 µg/ml; § 50 µg/ml ; ^ 100 µg/ml; v 50 and 100 µg/ml; \$ 50 and 200 µg/ml

Supplementary Figure 4. Effect of bacterial lysates on CAL27 proliferation (ATP assay)

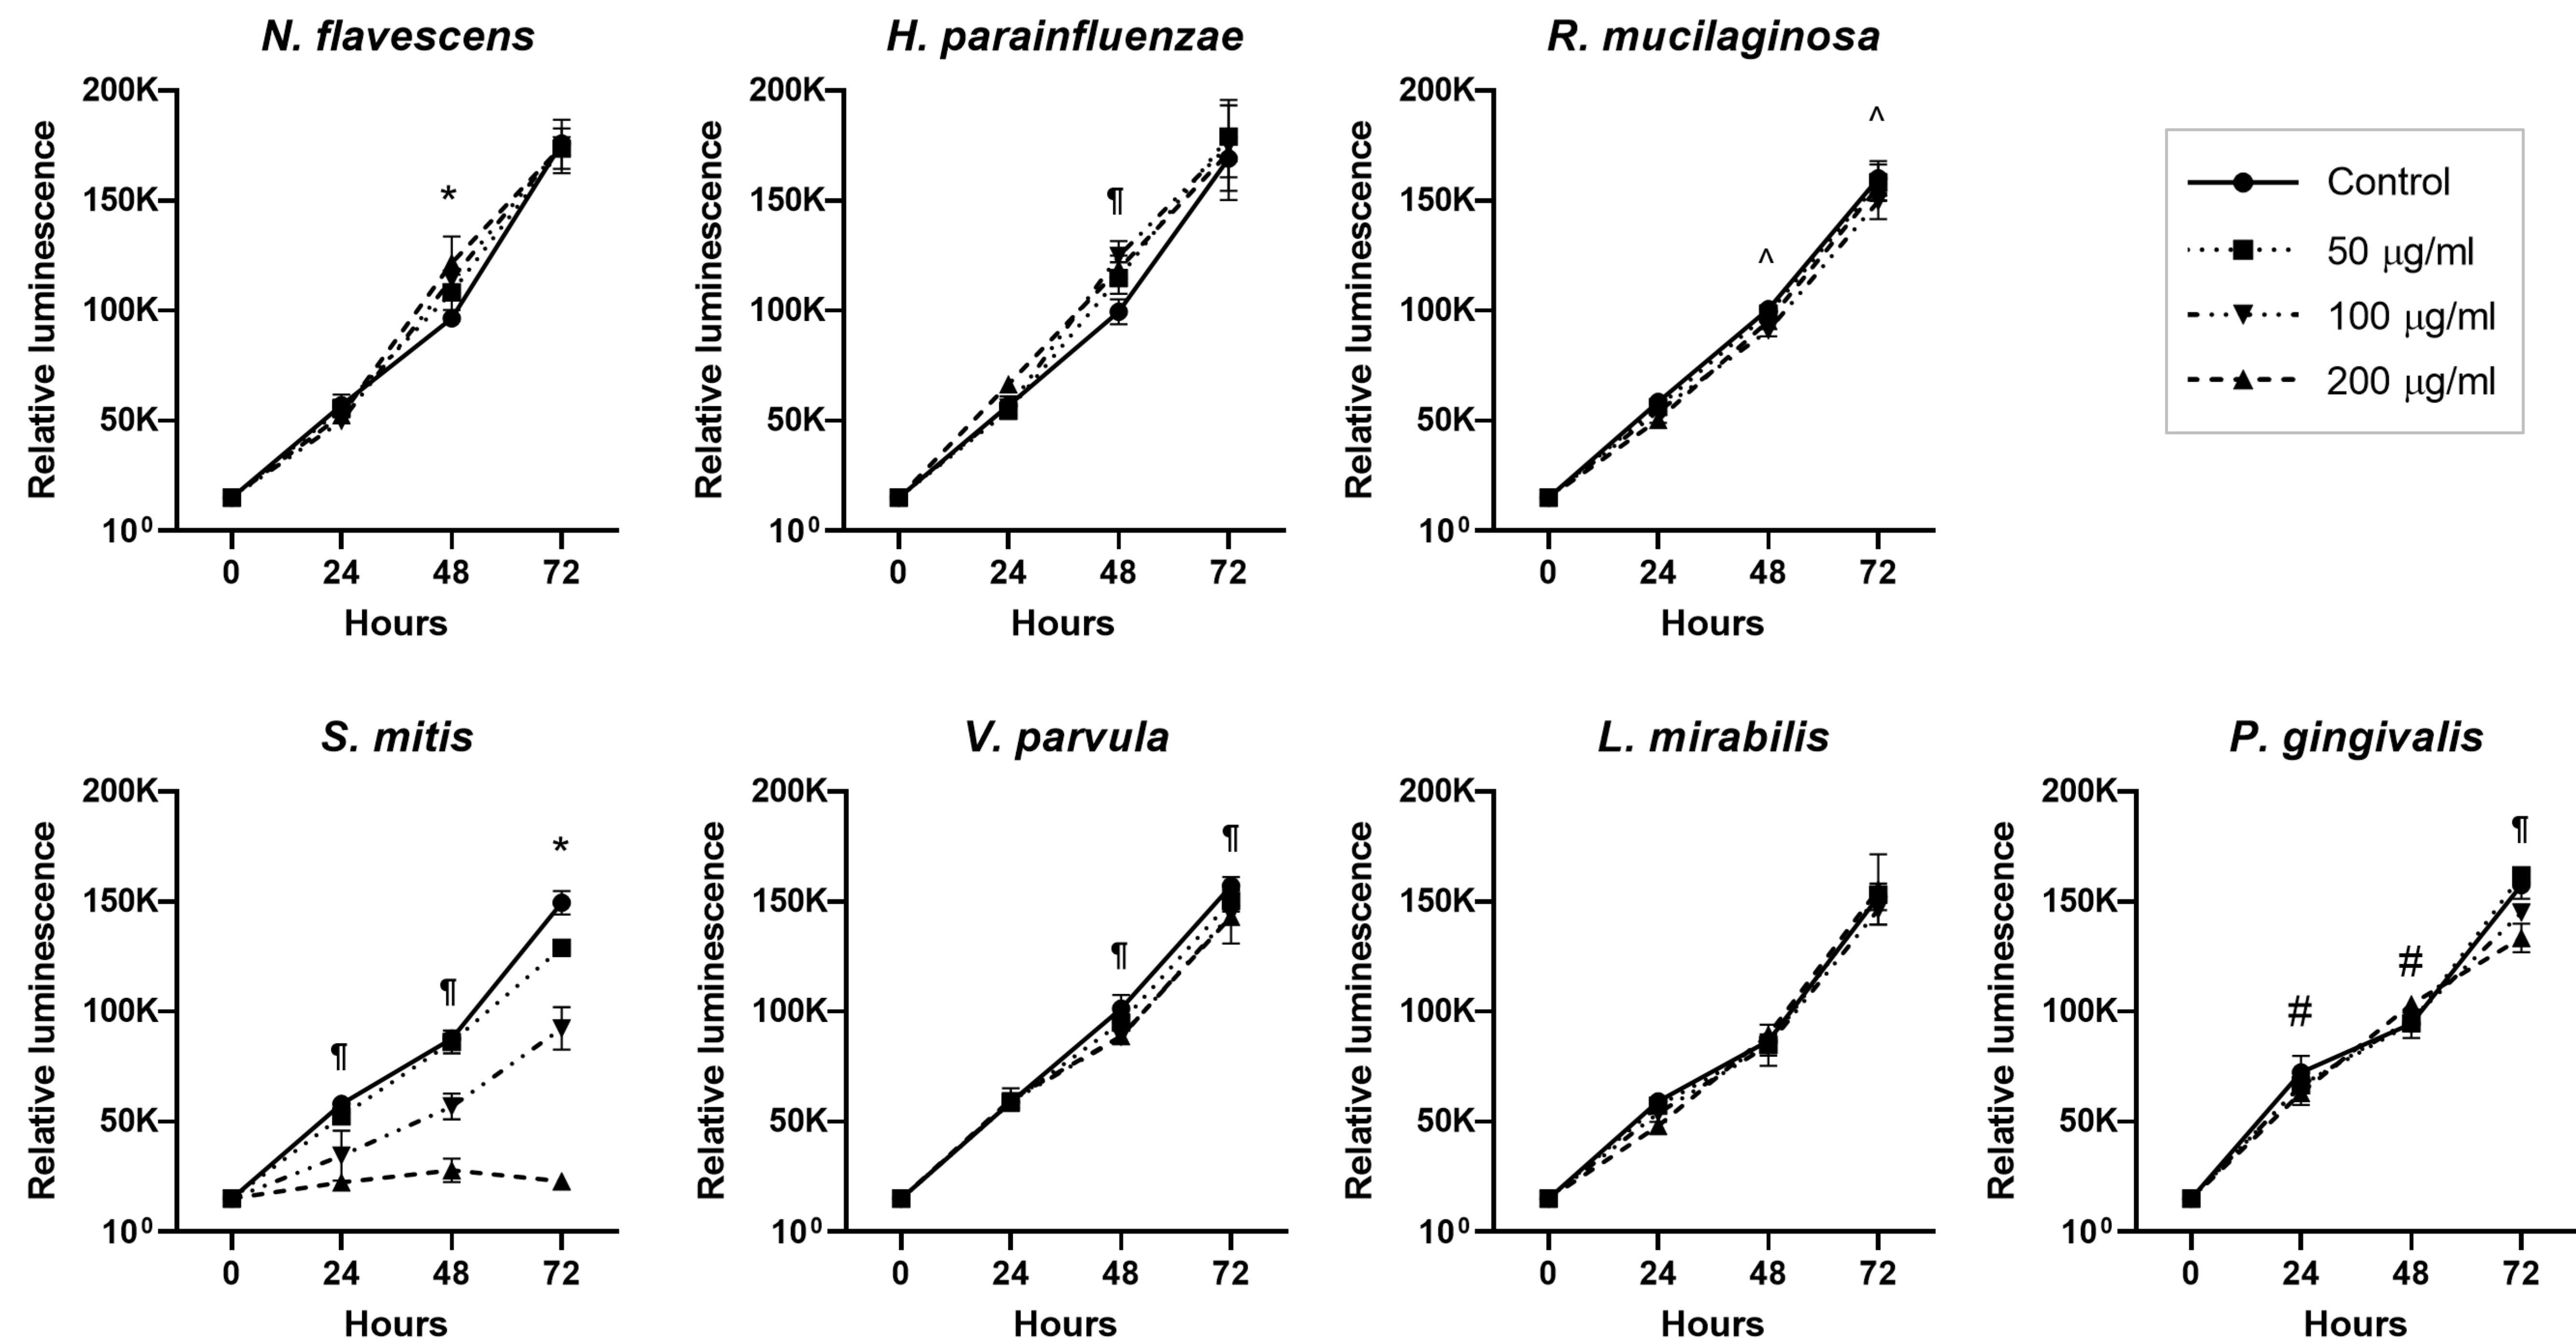

Significant difference for \* all concentrations; ¶ 100 and 200 µg/ml; # 200 µg/ml; § 50 µg/ml ; ^ 100 µg/ml; v 50 and 100 µg/ml; \$ 50 and 200 µg/ml

Supplementary Figure 5. Effect of bacterial lysates on SCC25 proliferation (ATP assay)

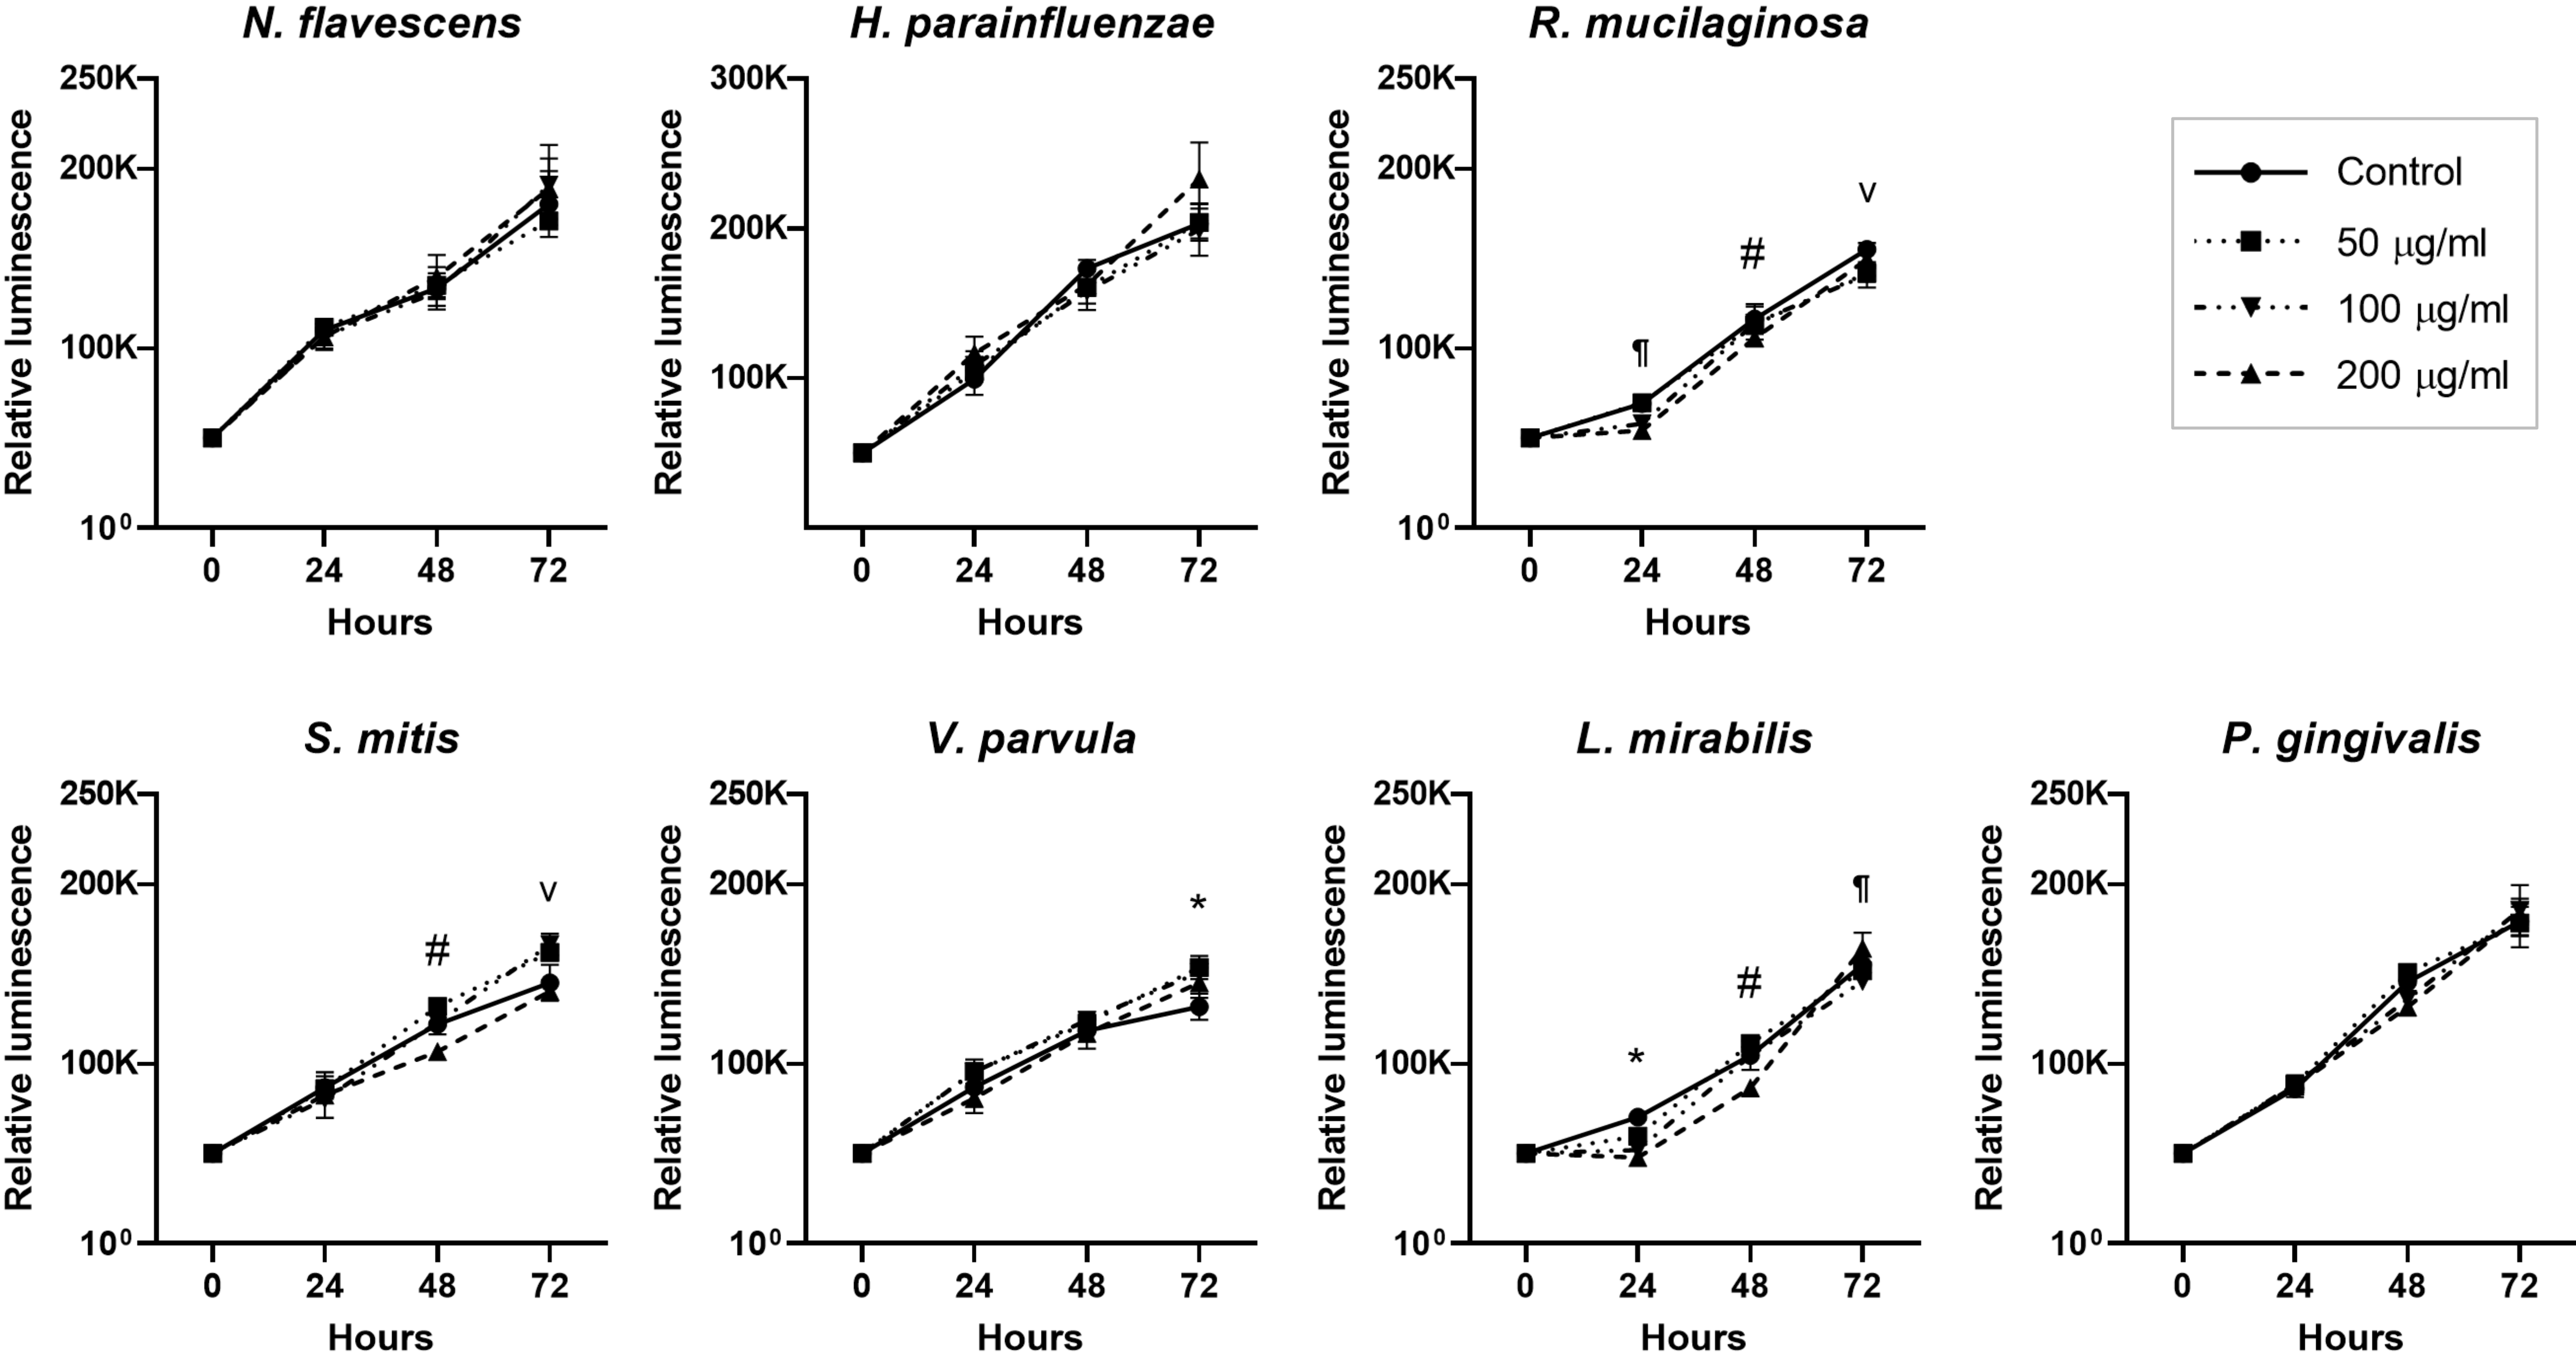

Significant difference for \* all concentrations; ¶ 100 and 200 µg/ml; # 200 µg/ml; § 50 µg/ml ; ^ 100 µg/ml; v 50 and 100 µg/ml; \$ 50 and 200 µg/ml

Supplementary Figure 6. Effect of bacterial lysates on SCC4 proliferation (ATP assay)

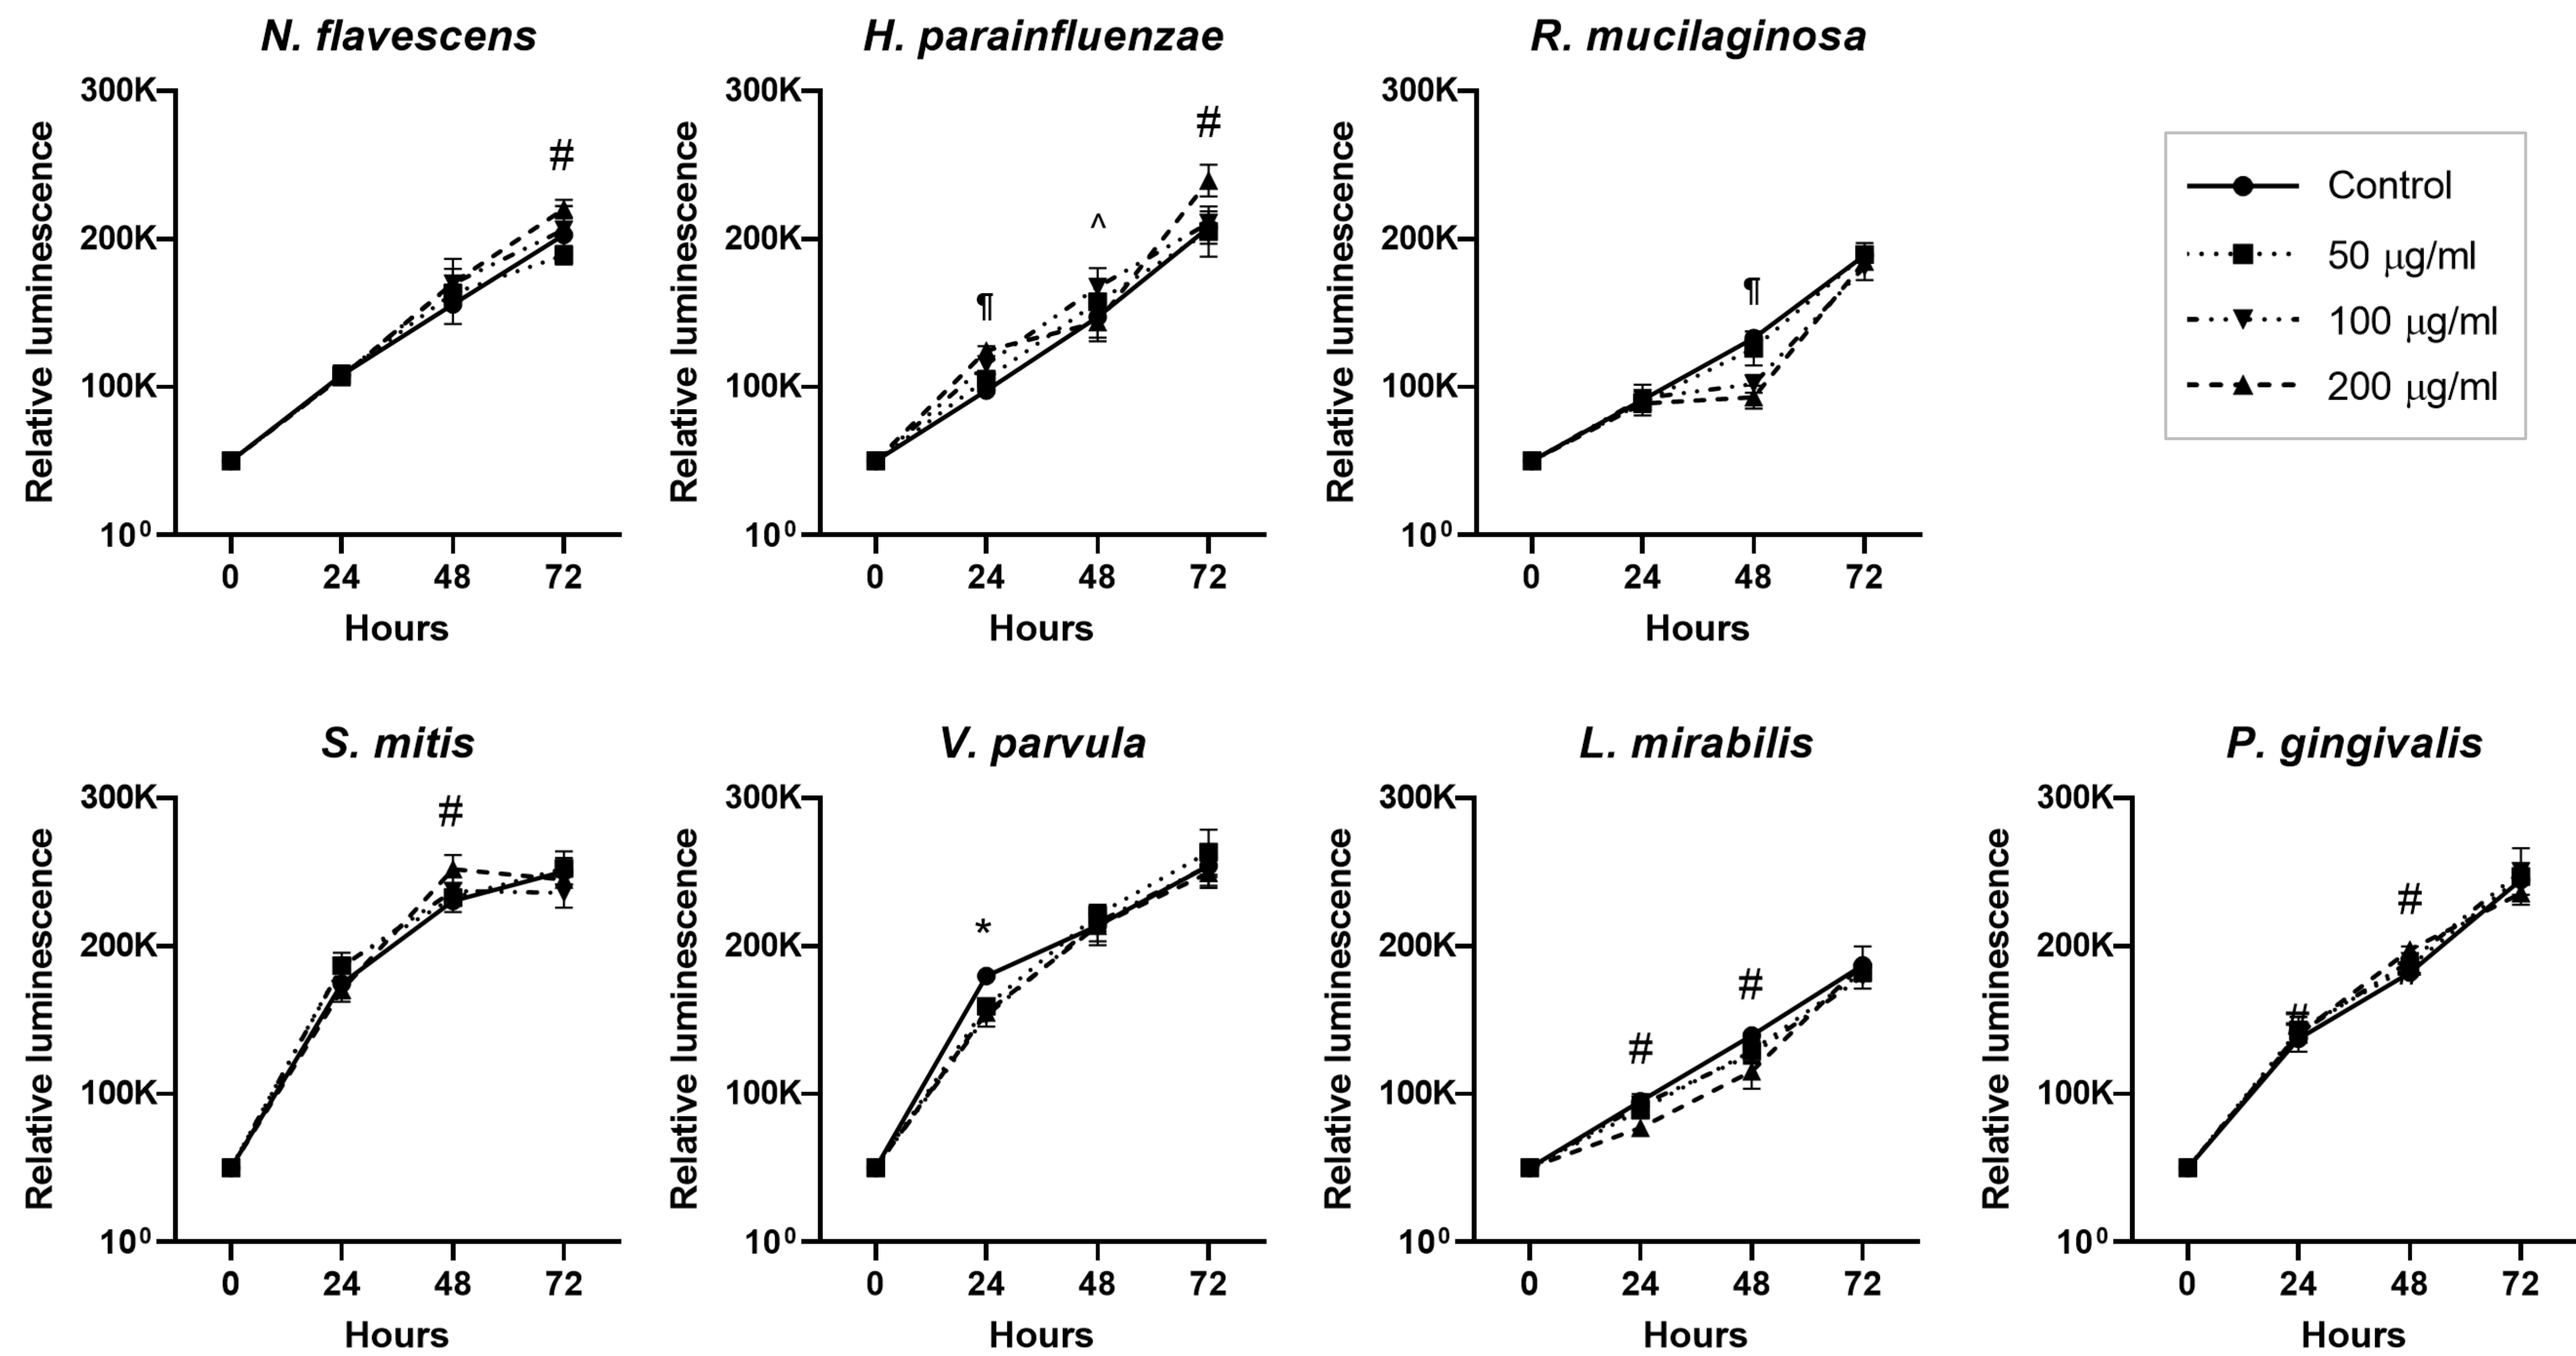

Significant difference for \* all concentrations; ¶ 100 and 200 µg/ml; # 200 µg/ml; § 50 µg/ml ; ^ 100 µg/ml; v 50 and 100 µg/ml; \$ 50 and 200 µg/ml

Supplementary Figure 7. Effect of cocultures with bacteria on CAL27 proliferation (counting)

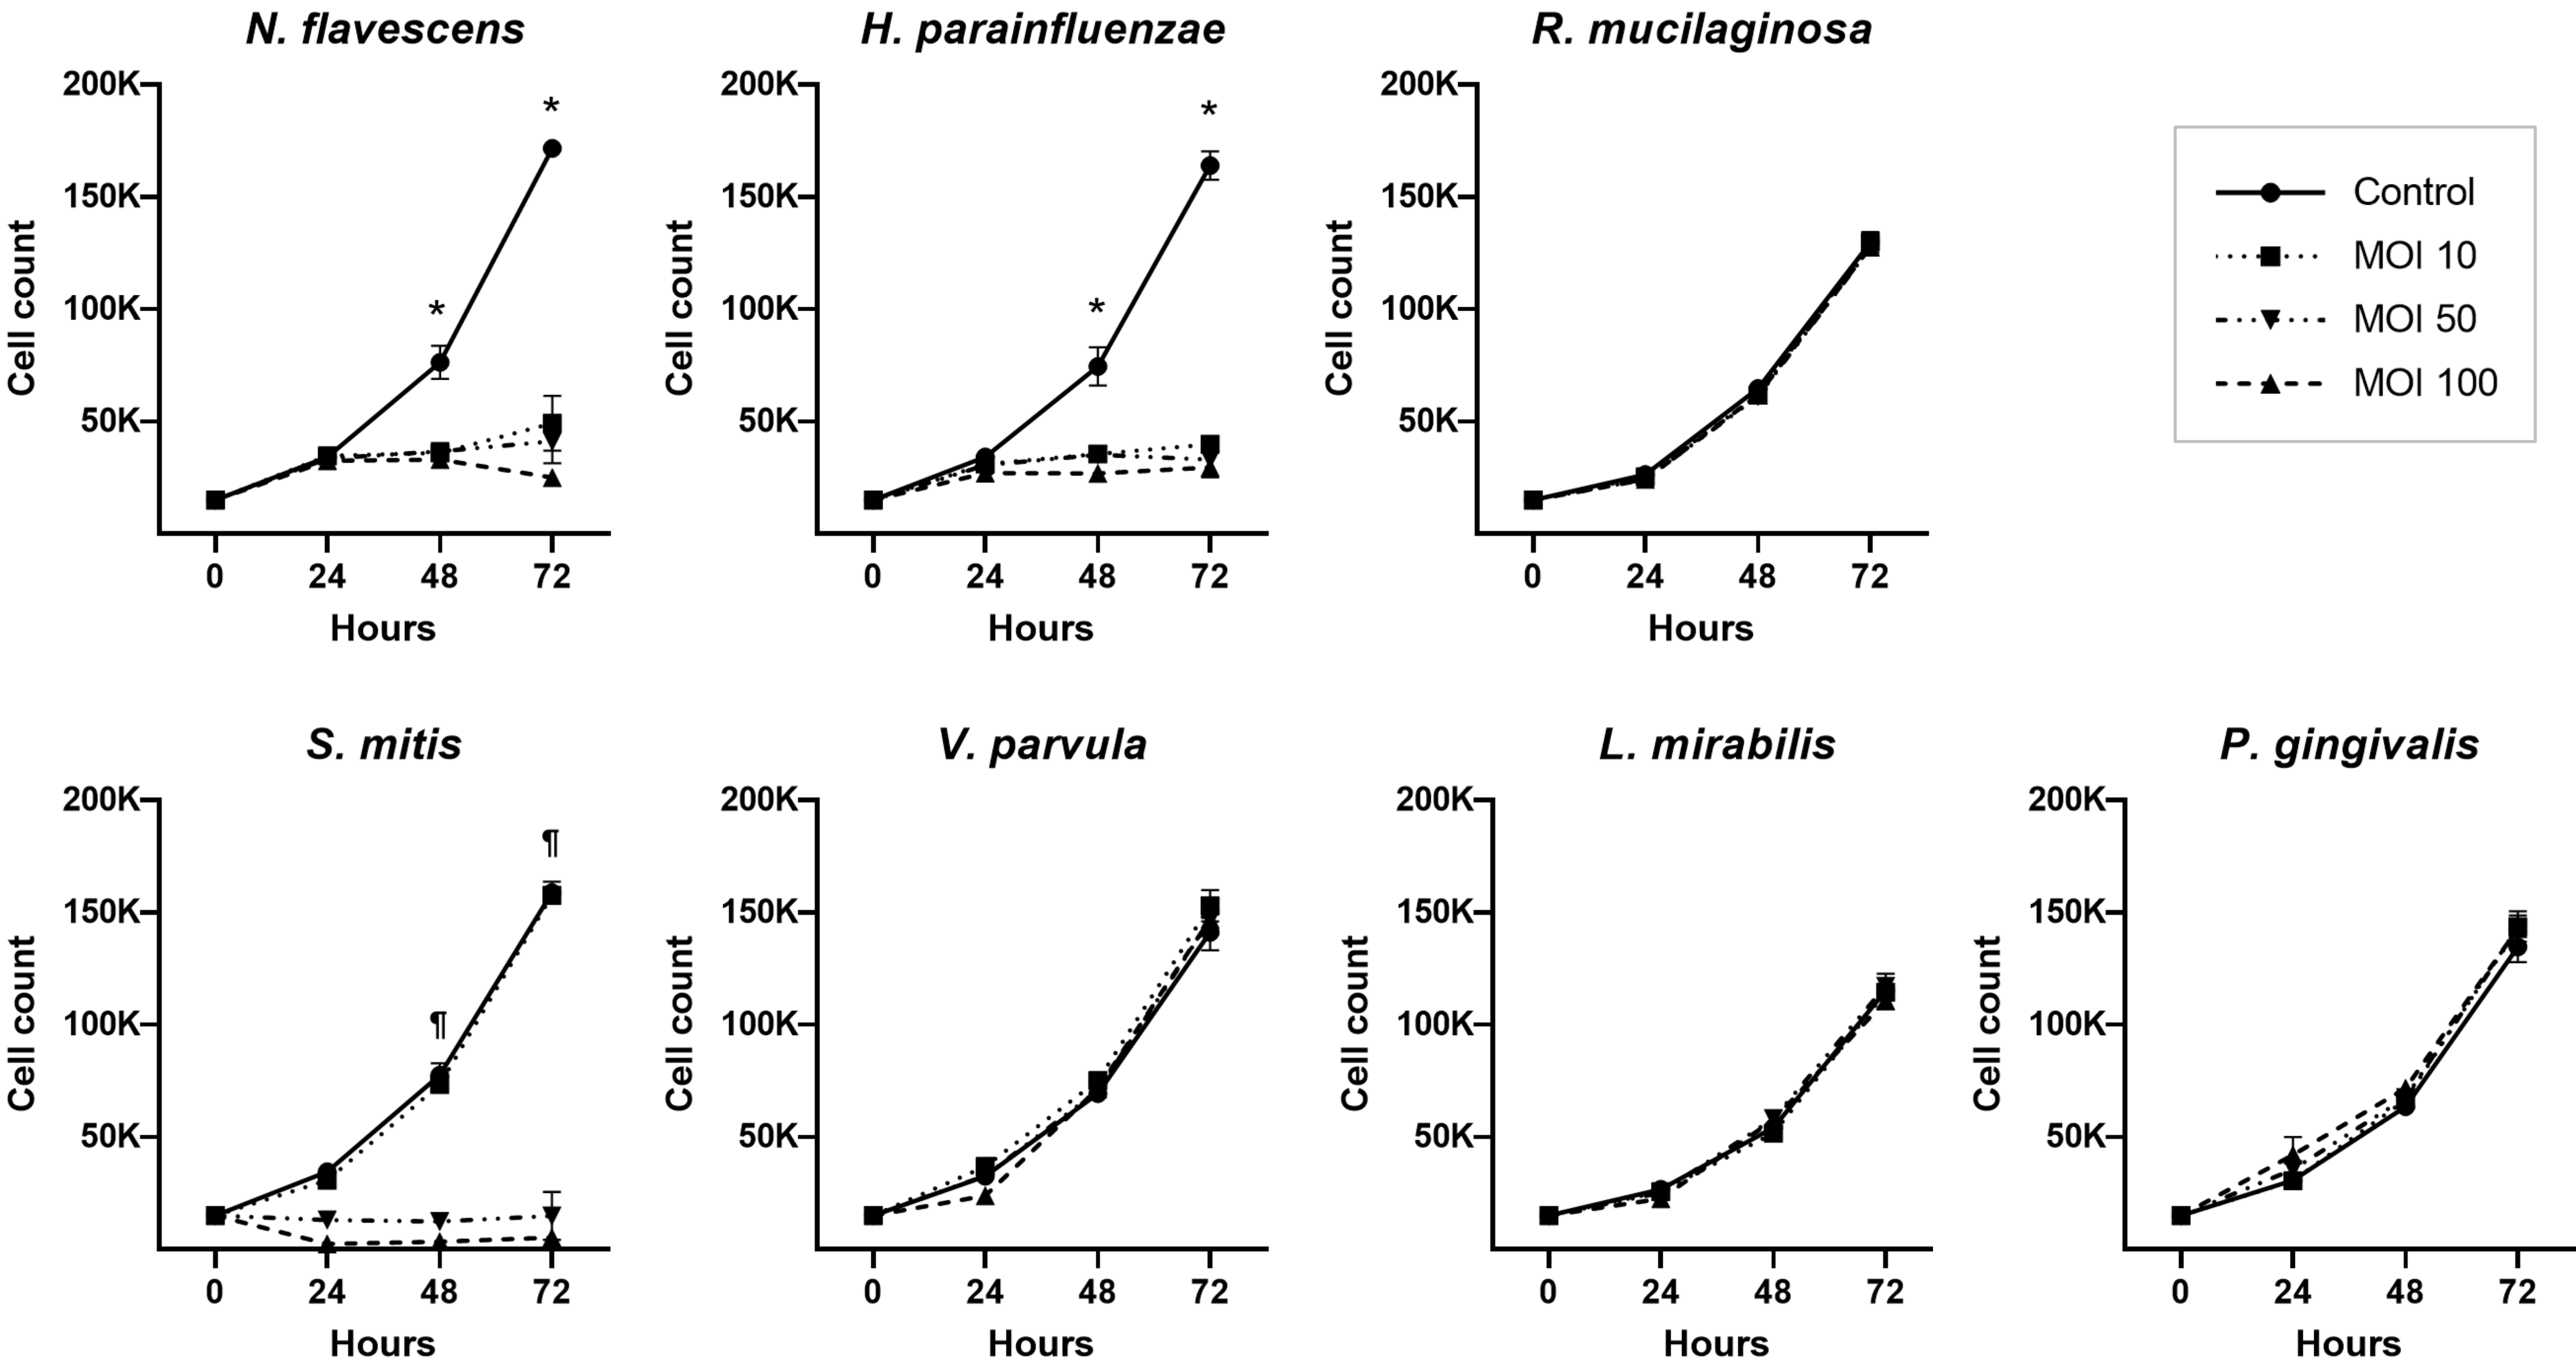

Significant difference for \* all concentrations; ¶ MOI 50 and 100; # MOI 100; § MOI 10 ; ^ MOI 50; v MOI 10 and 50; \$ MOI 10 and 100



Supplementary Figure 8. Effect of cocultures with bacteria on SCC25 proliferation (counting)

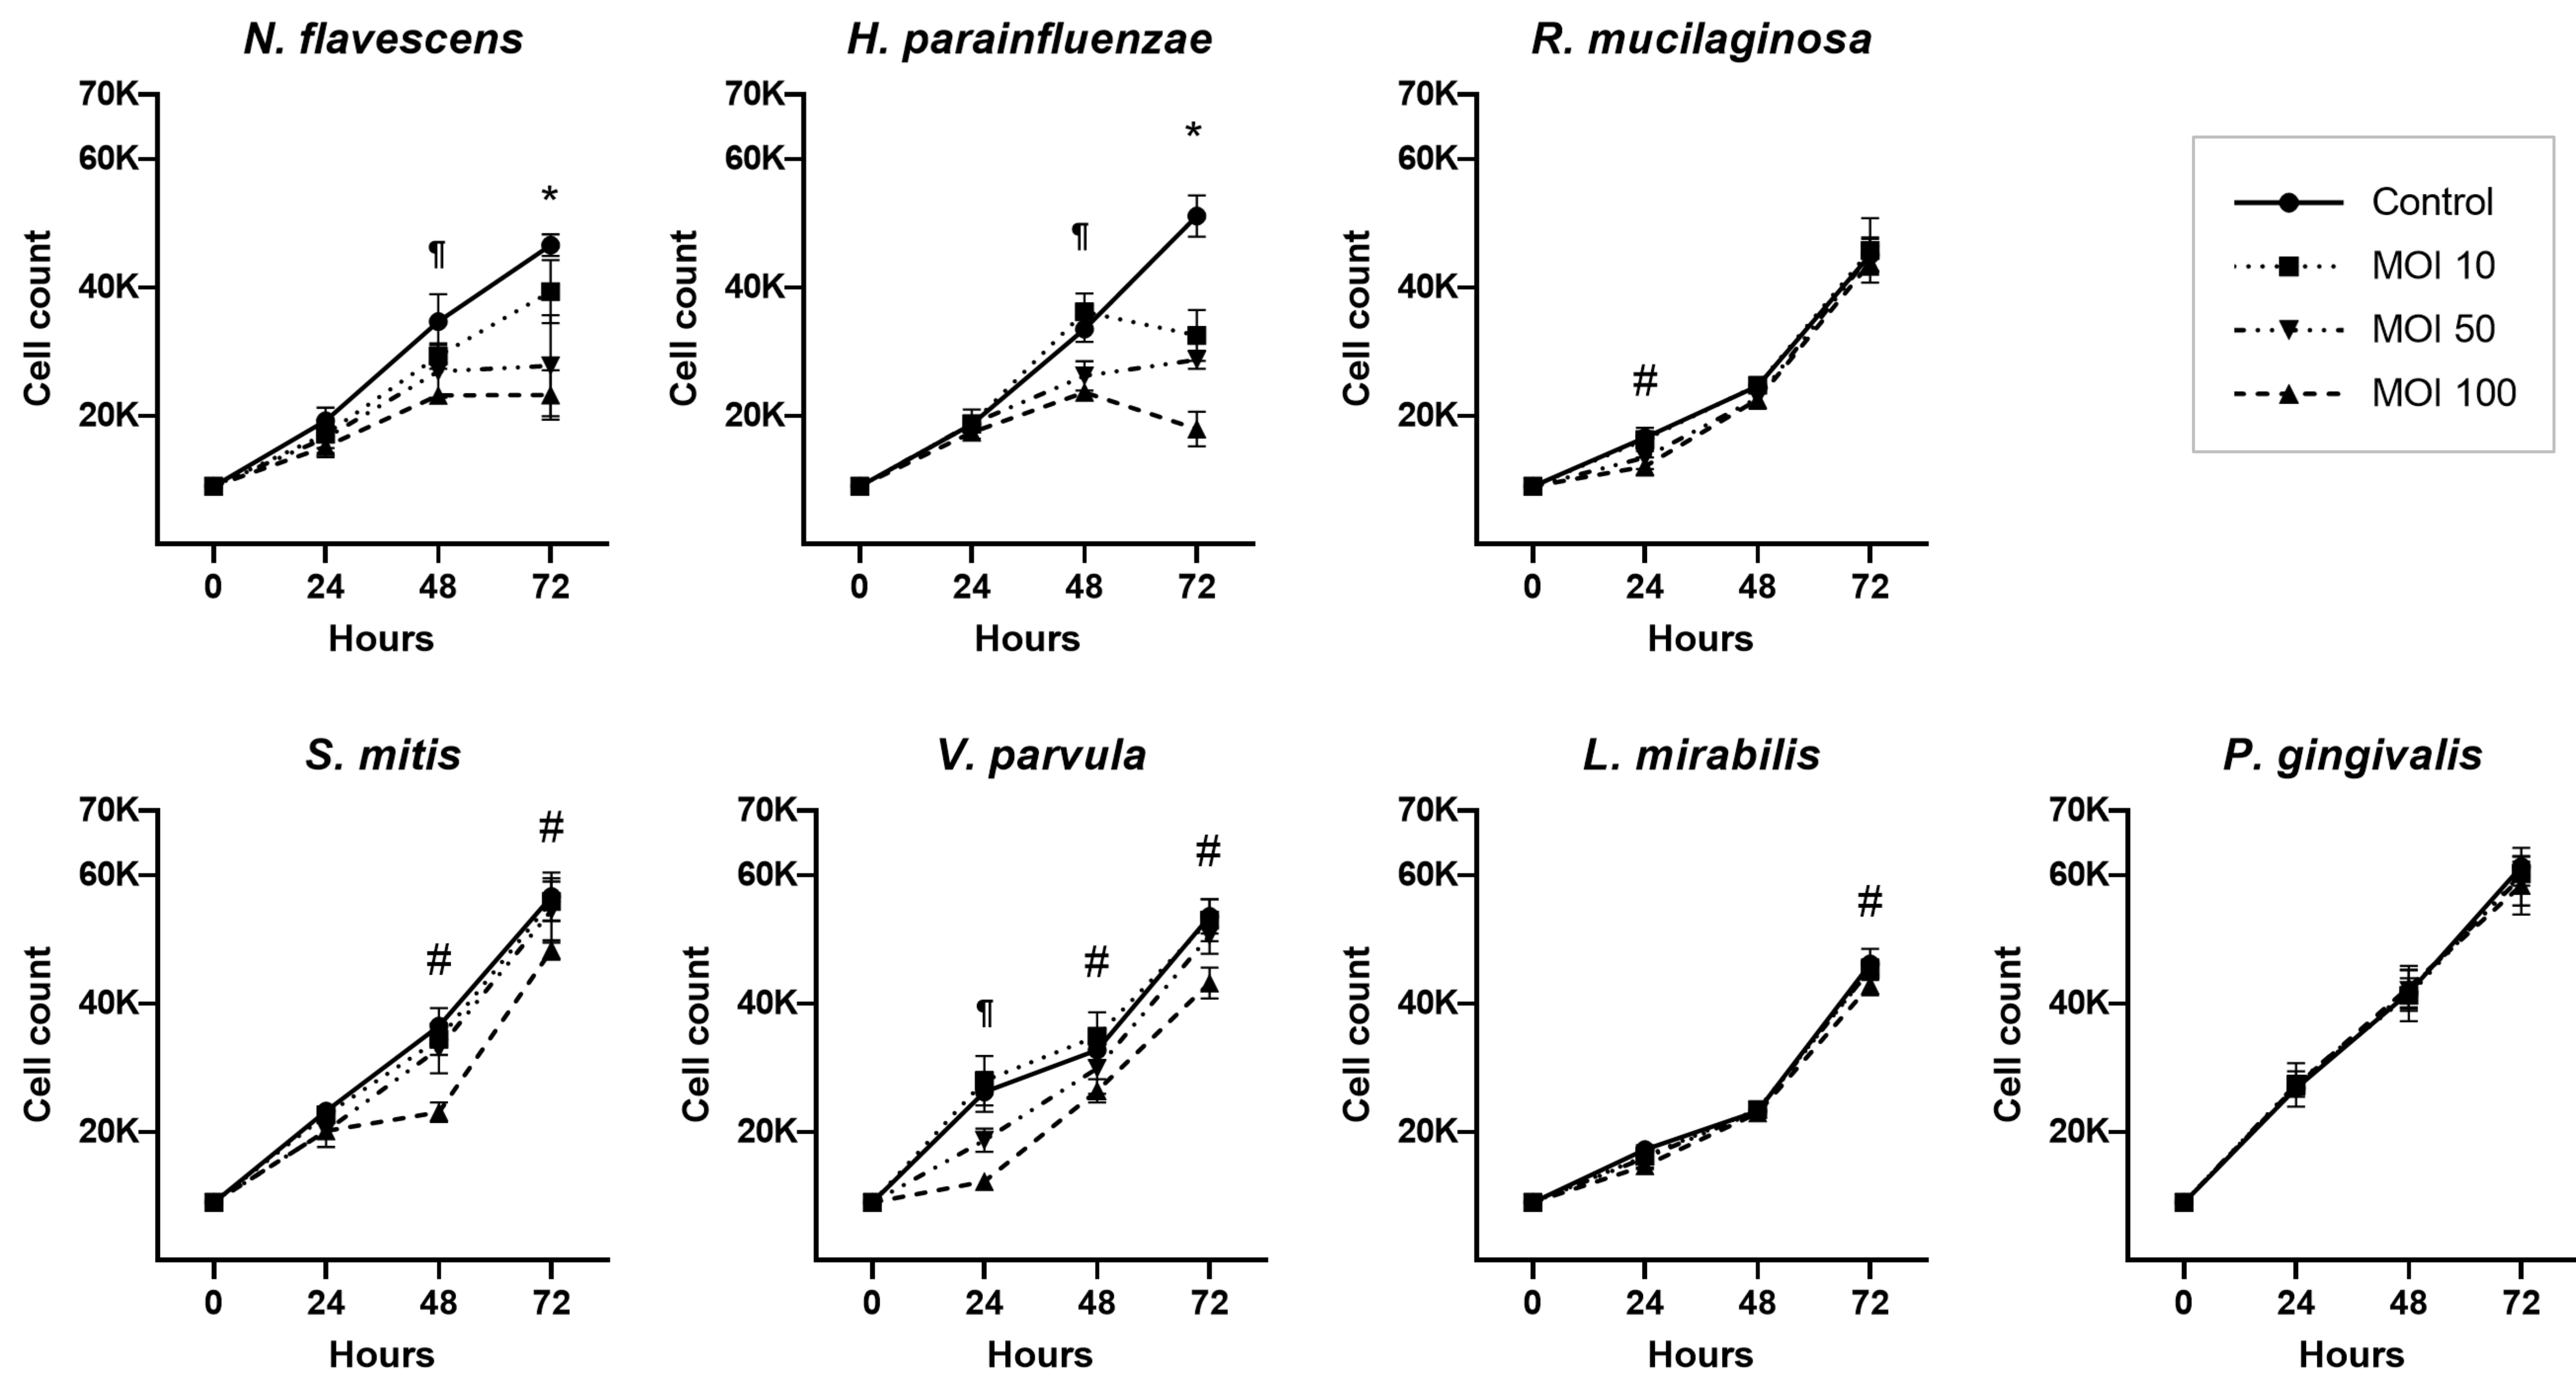

Significant difference for \* all concentrations; § MOI 50 and 100; # MOI 100; § MOI 10 ; ^ MOI 50; v MOI 10 and 50; \$ MOI 10 and 100



# Supplementary Figure 9. Effect of cocultures with bacteria on SCC4 proliferation (counting)

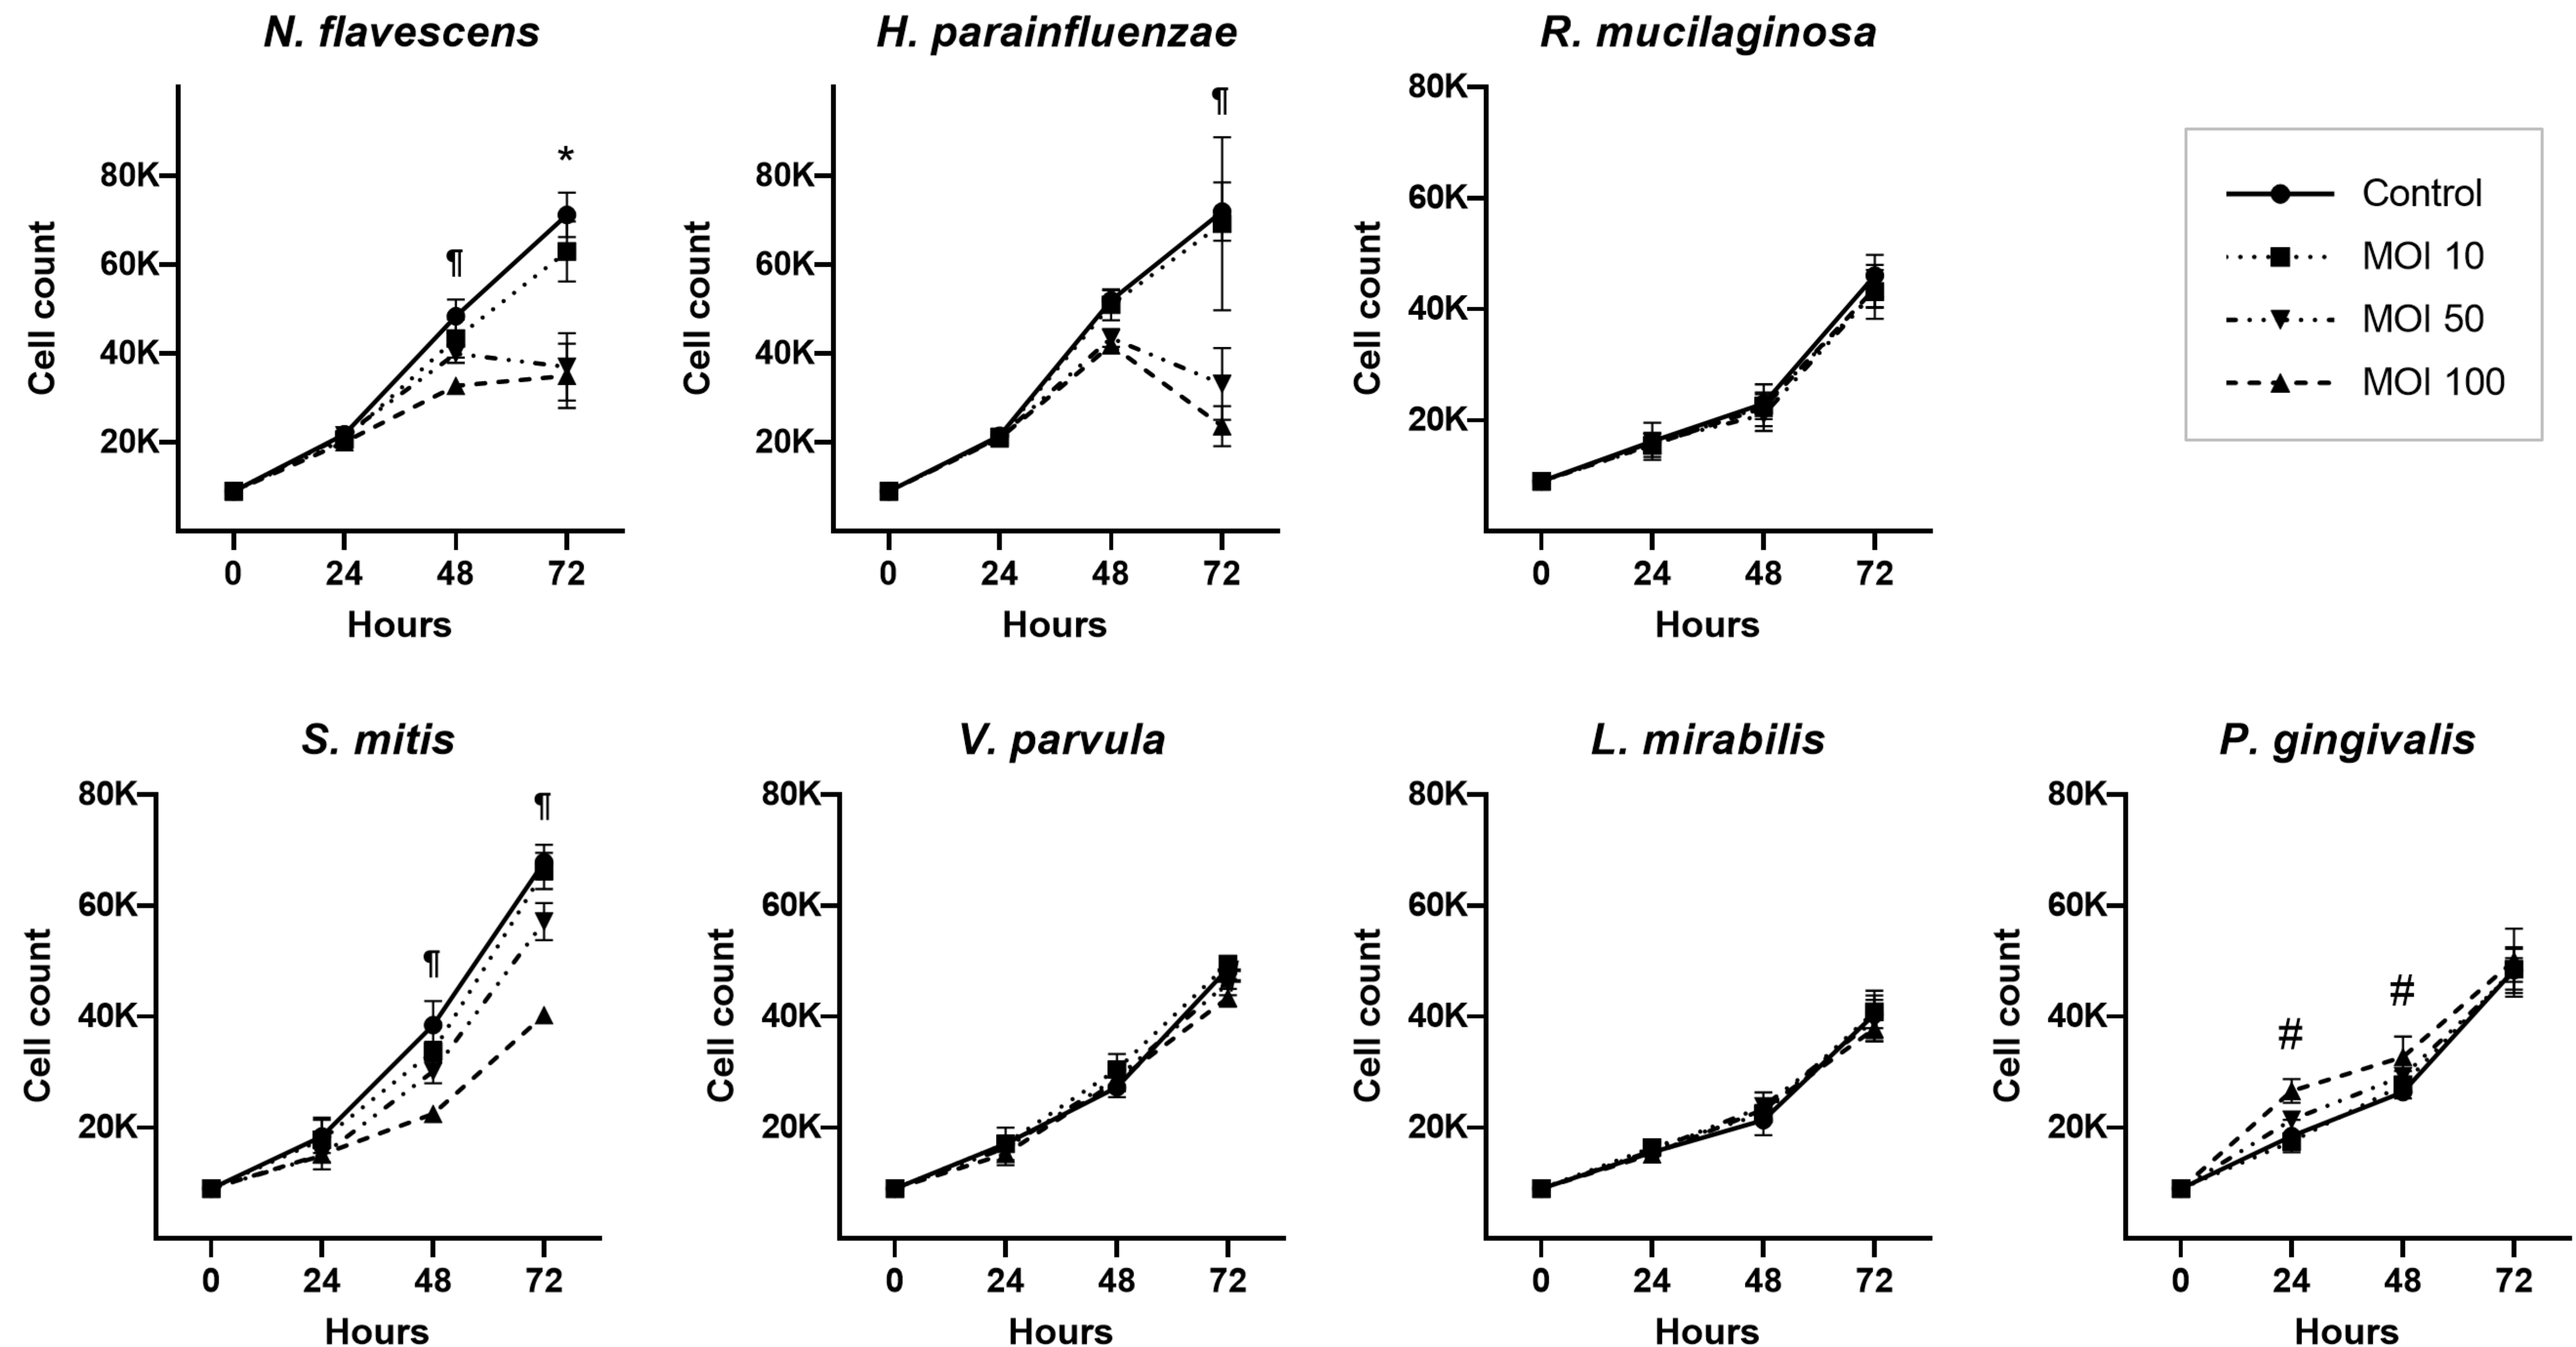

Significant difference for \* all concentrations; ¶ MOI 50 and 100; # MOI 100; § MOI 10 ; ^ MOI 50; v MOI 10 and 50; \$ MOI 10 and 100

Supplementary Figure 10. Effect of cocultures with bacteria on CAL27 proliferation (ATP assay)

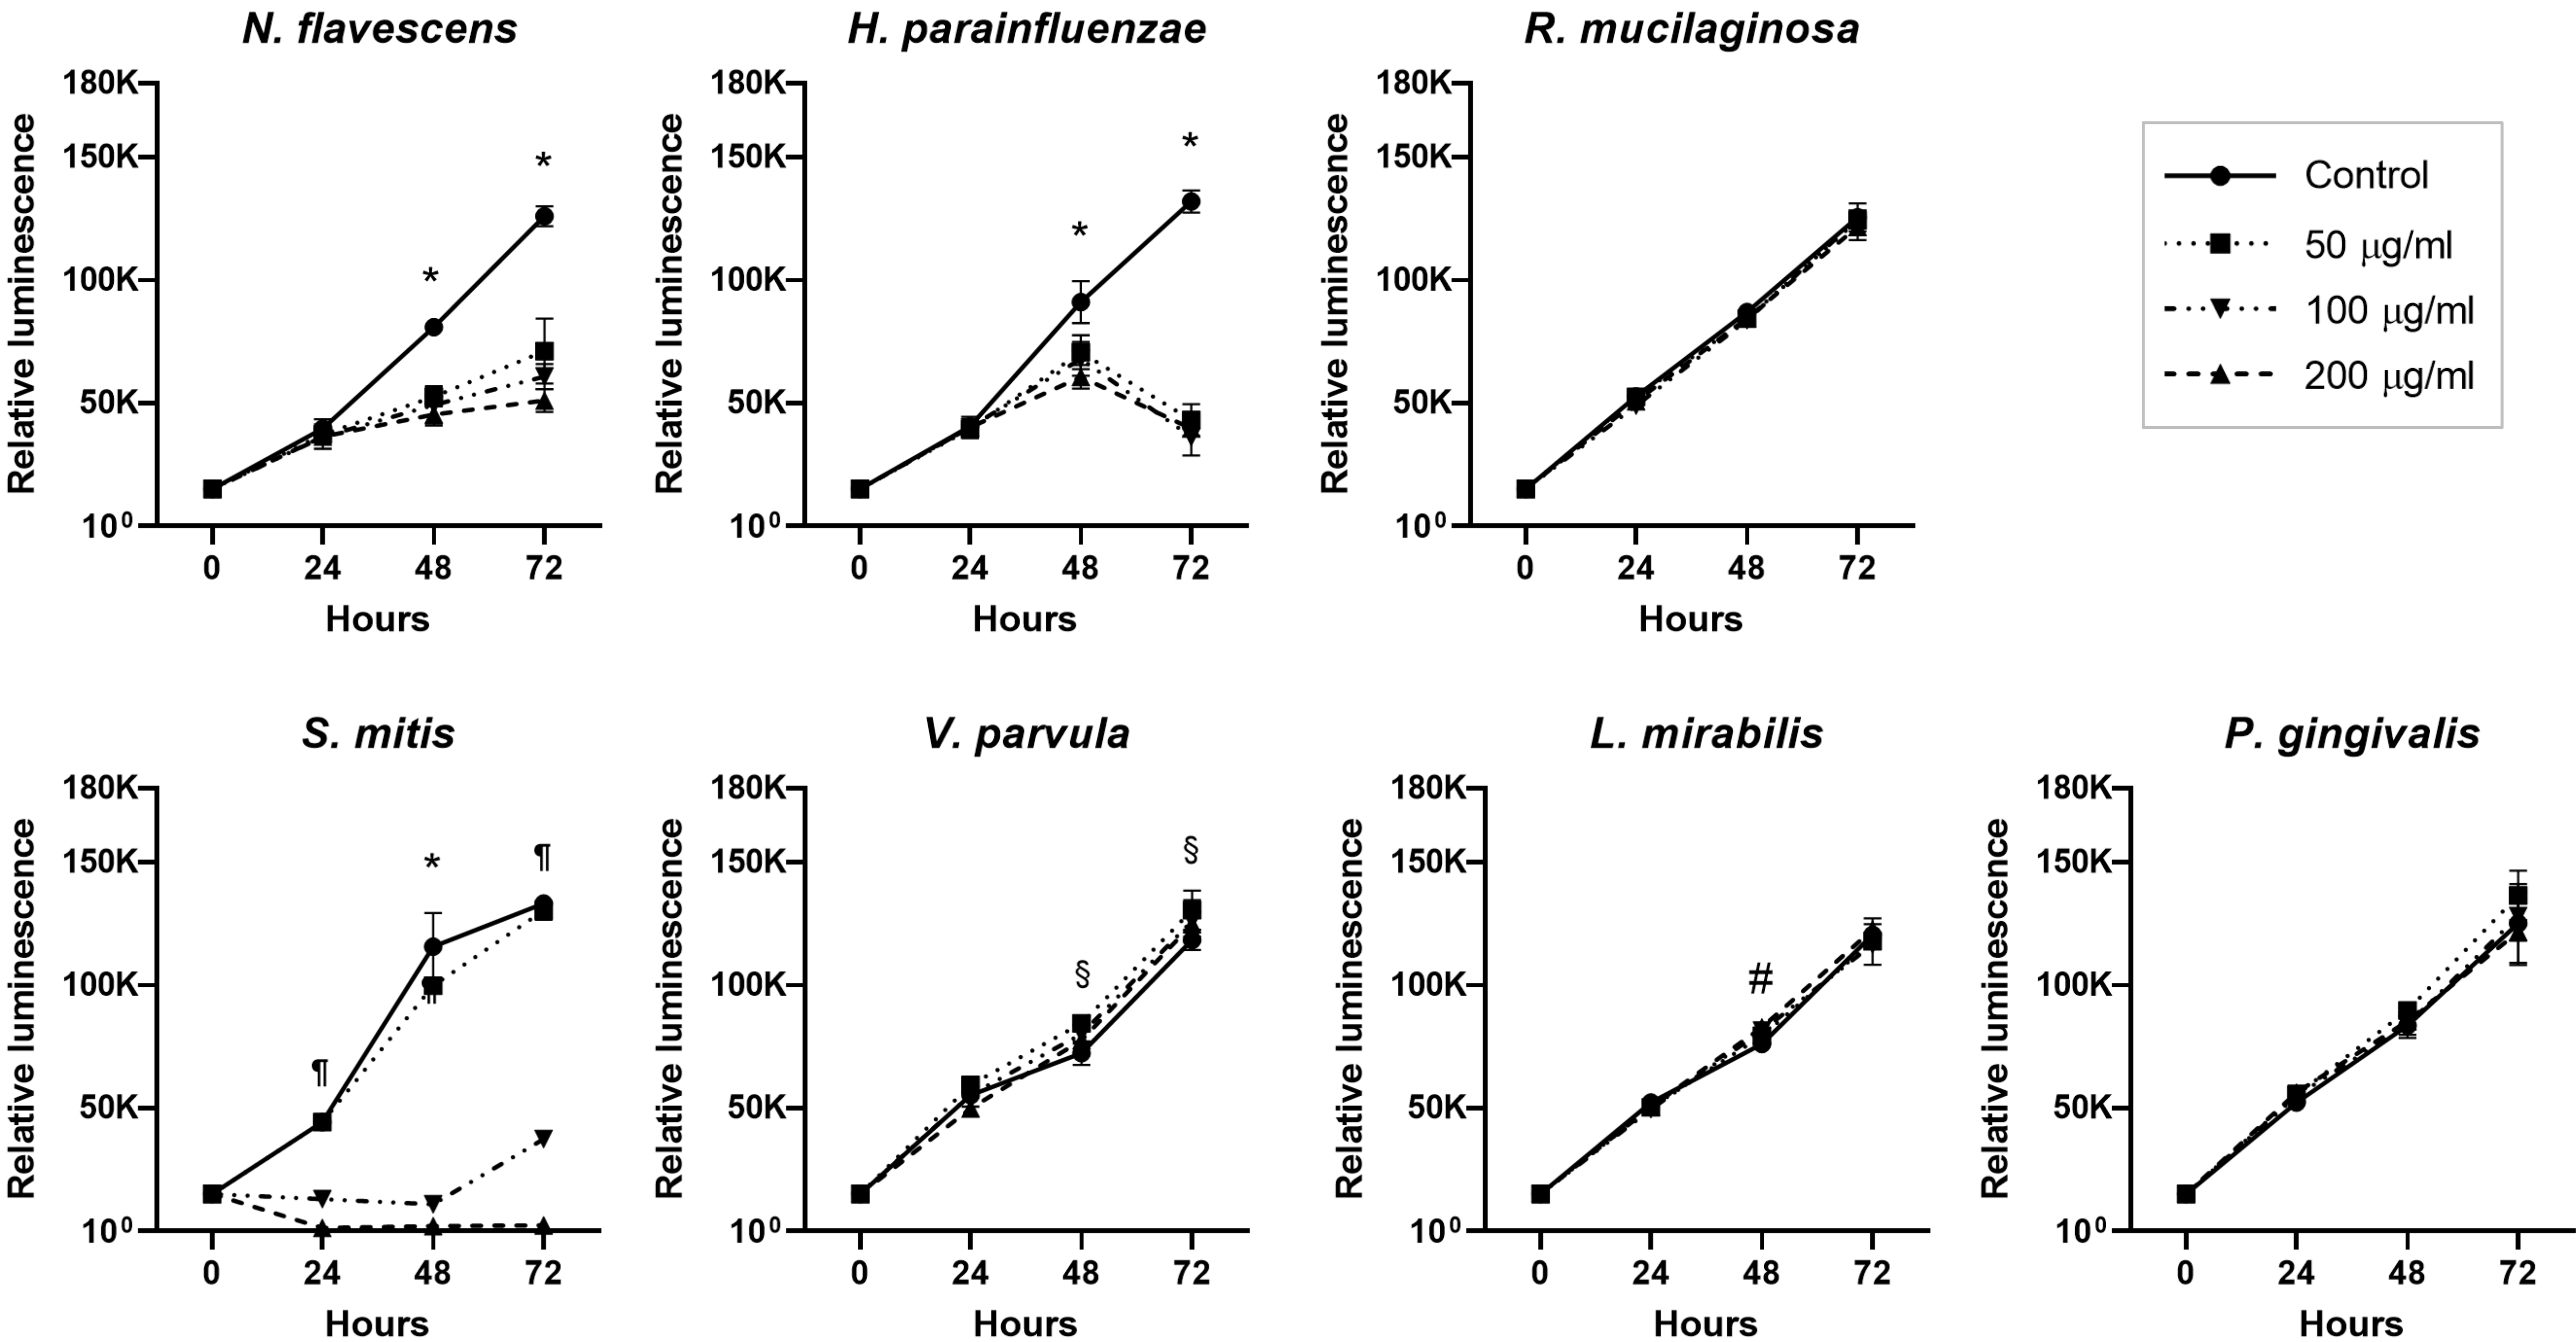

Significant difference for \* all concentrations; ¶ MOI 50 and 100; # MOI 100; § MOI 10 ; ^ MOI 50; v MOI 10 and 50; \$ MOI 10 and 100

Supplementary Figure 11. Effect of cocultures with bacteria on SCC25 proliferation (ATP assay)

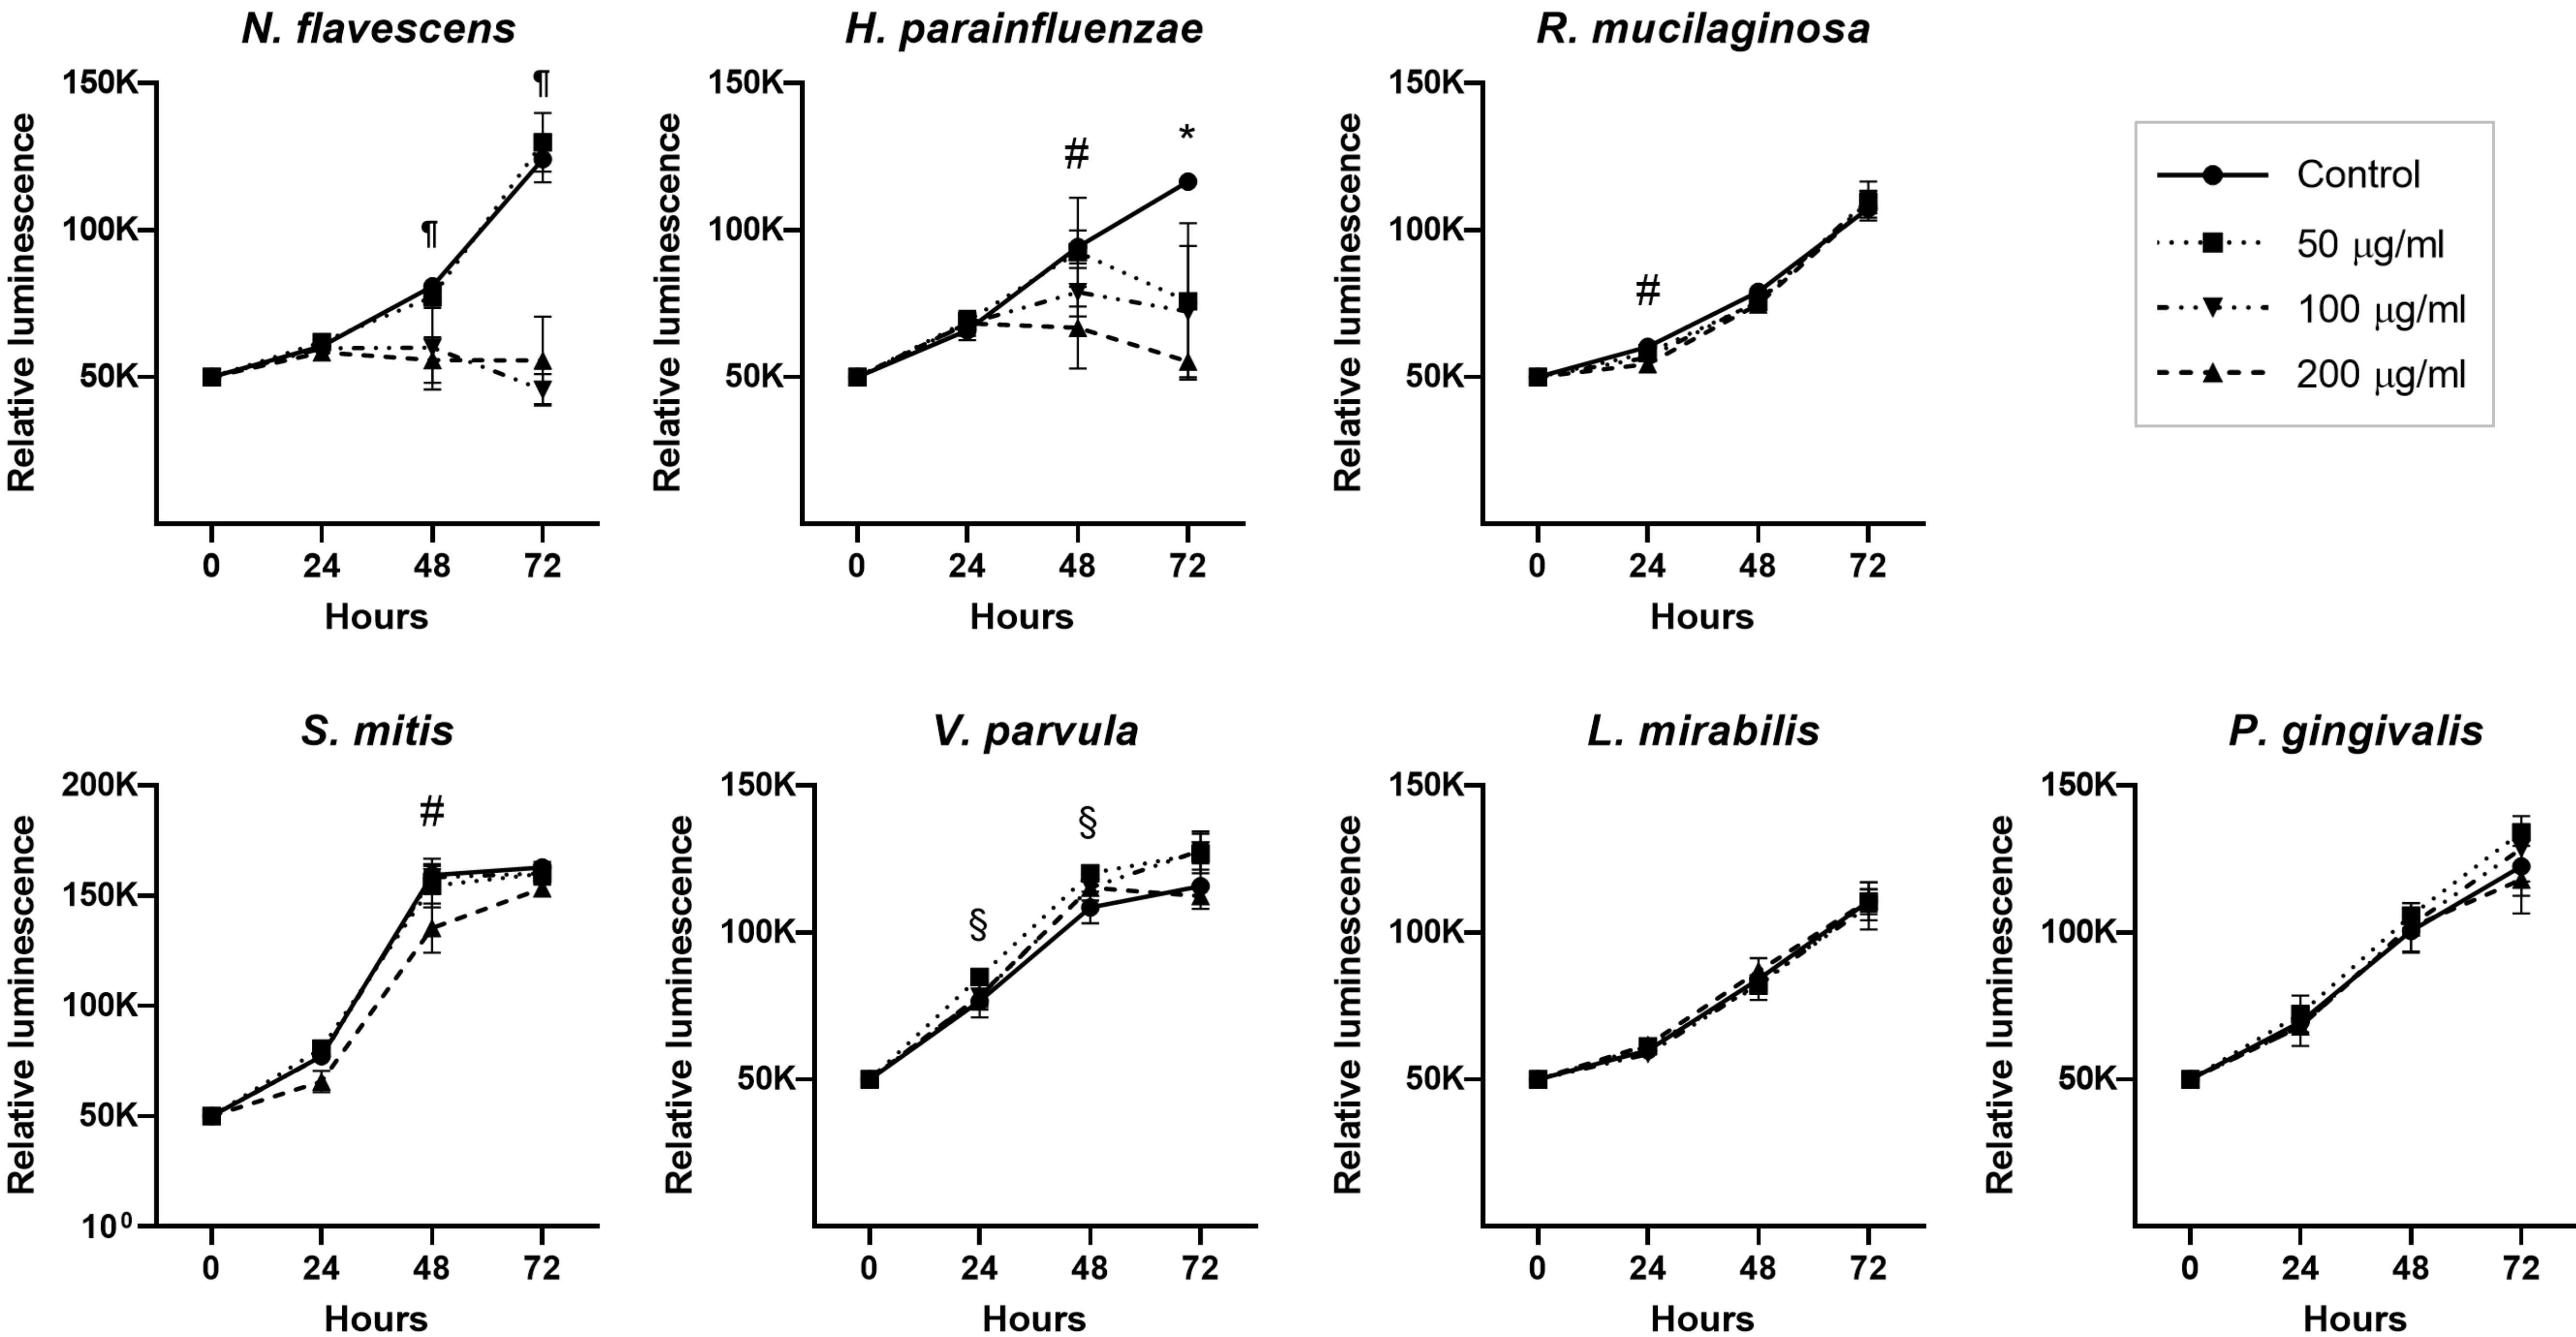

Significant difference for \* all concentrations; ¶ MOI 50 and 100; # MOI 100; § MOI 10 ; ^ MOI 50; v MOI 10 and 50; \$ MOI 10 and 100

Supplementary Figure 12. Effect of cocultures with bacteria on SCC4 proliferation (ATP assay)

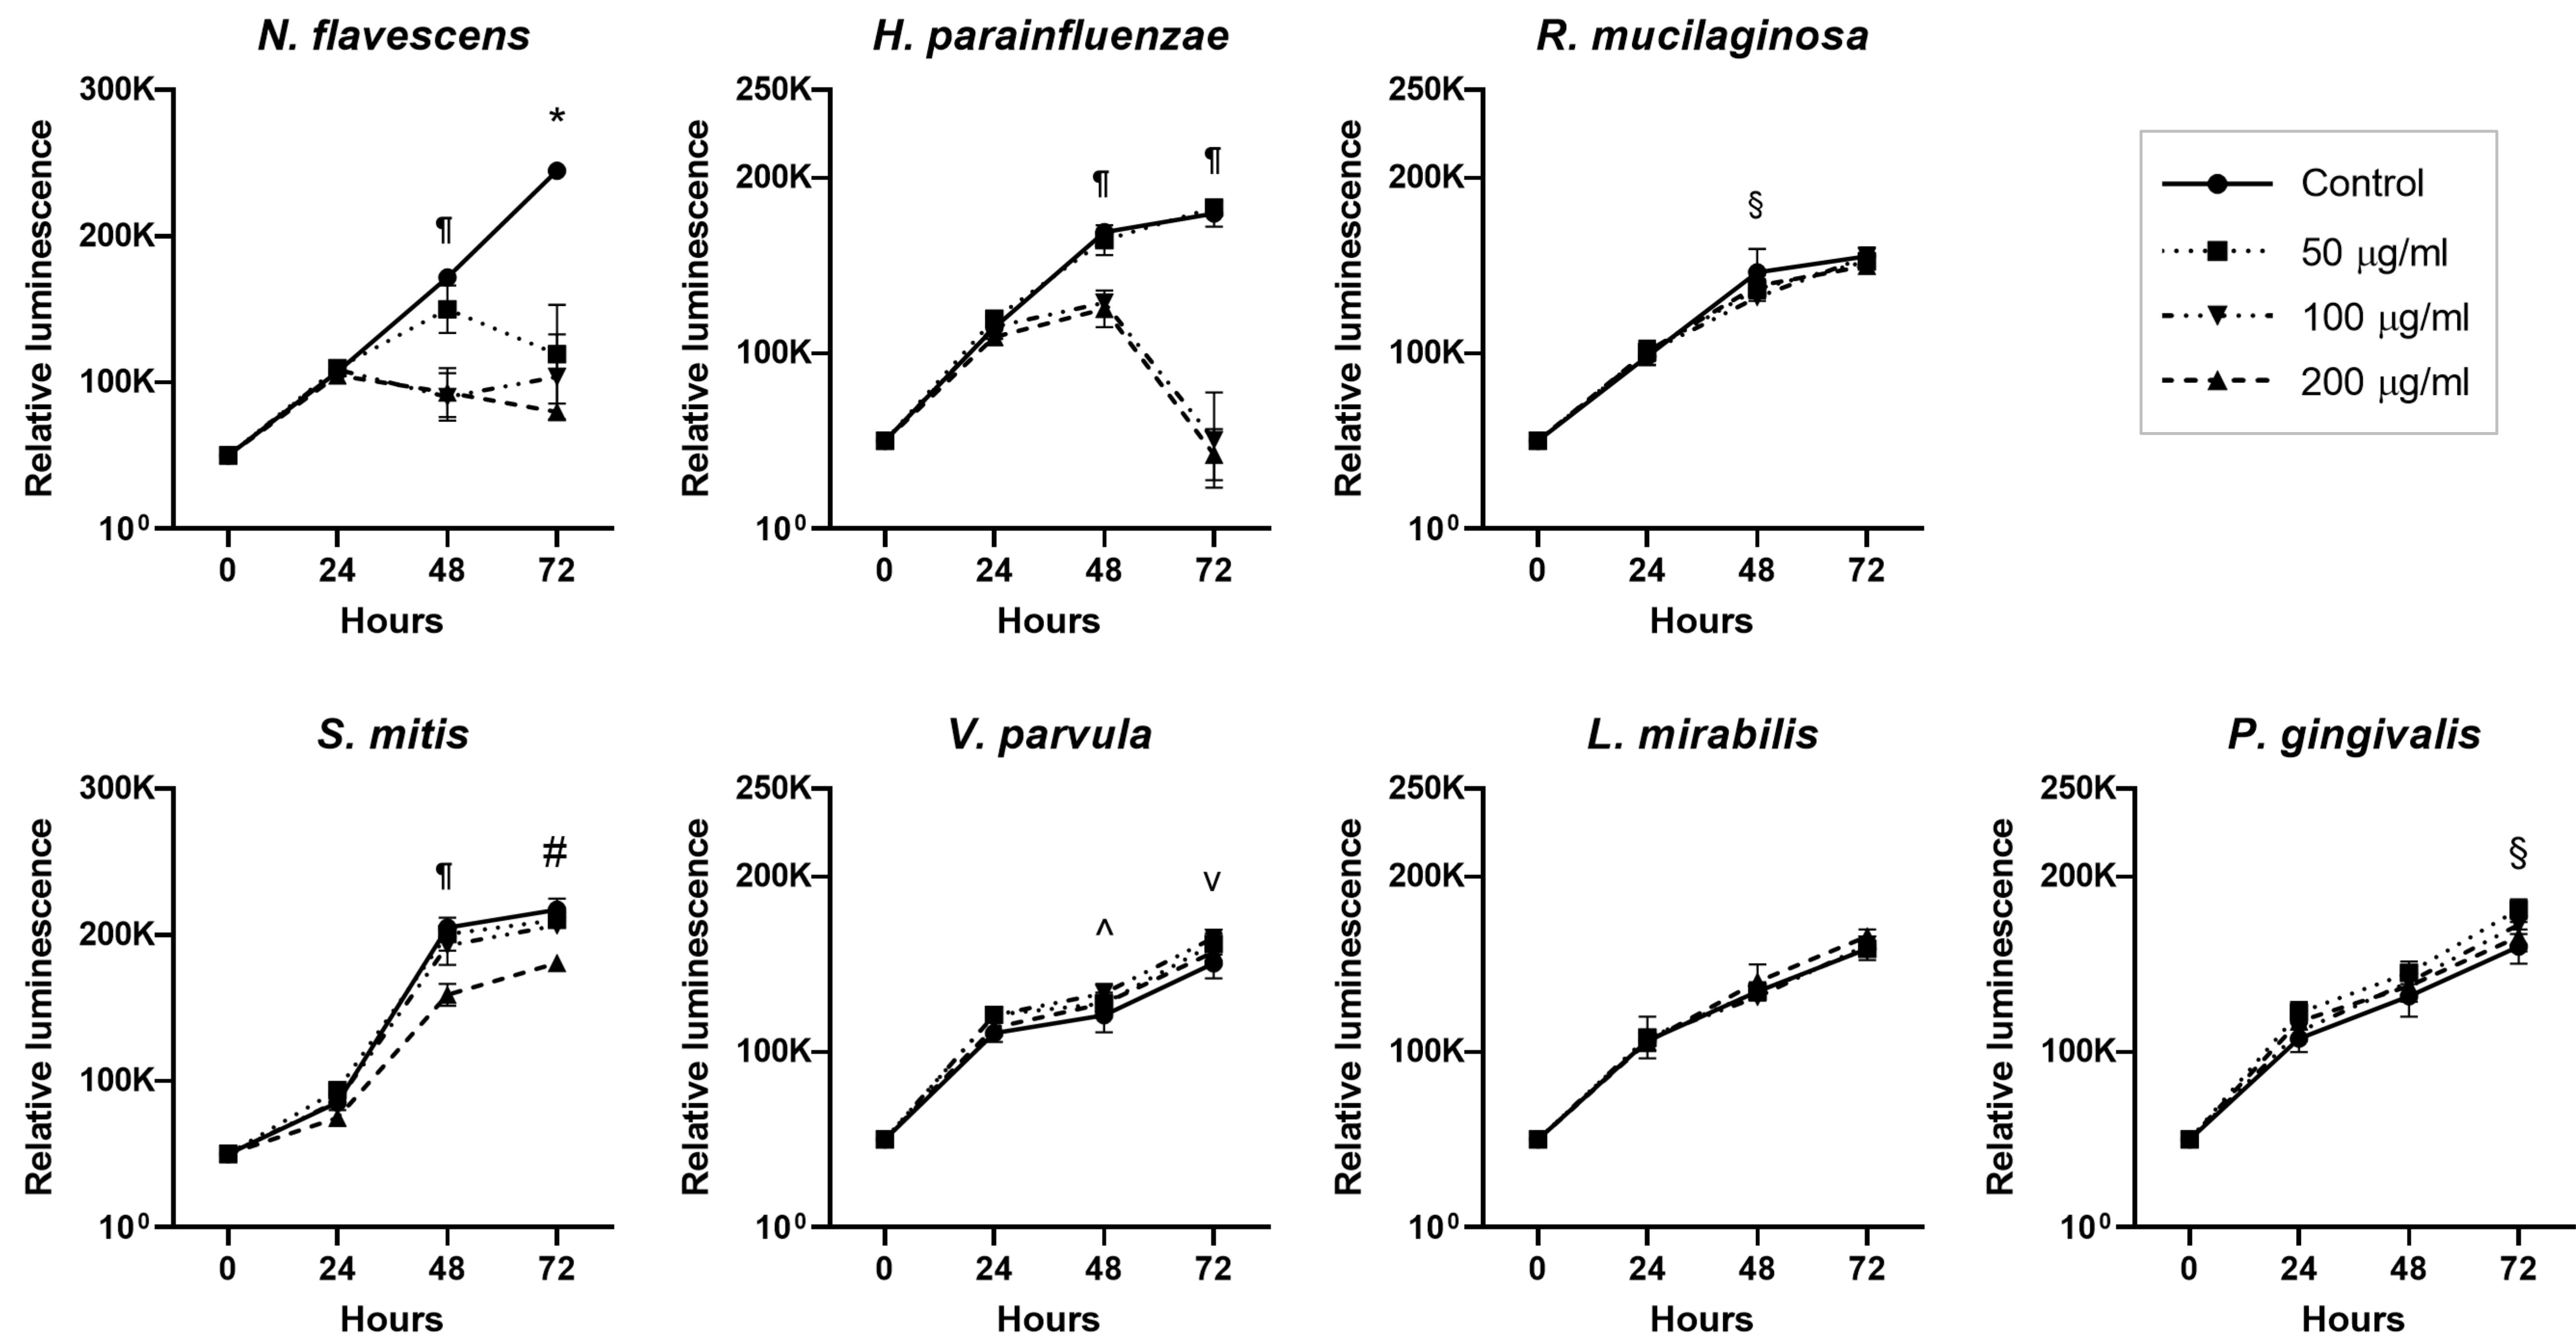

Significant difference for \* all concentrations; ¶ MOI 50 and 100; # MOI 100; § MOI 10 ; ^ MOI 50; v MOI 10 and 50; \$ MOI 10 and 100

Supplementary Figure 13. Effect of coculture with *S. mutans* and *S. sanguinis* on CAL27 proliferation (cell counts)

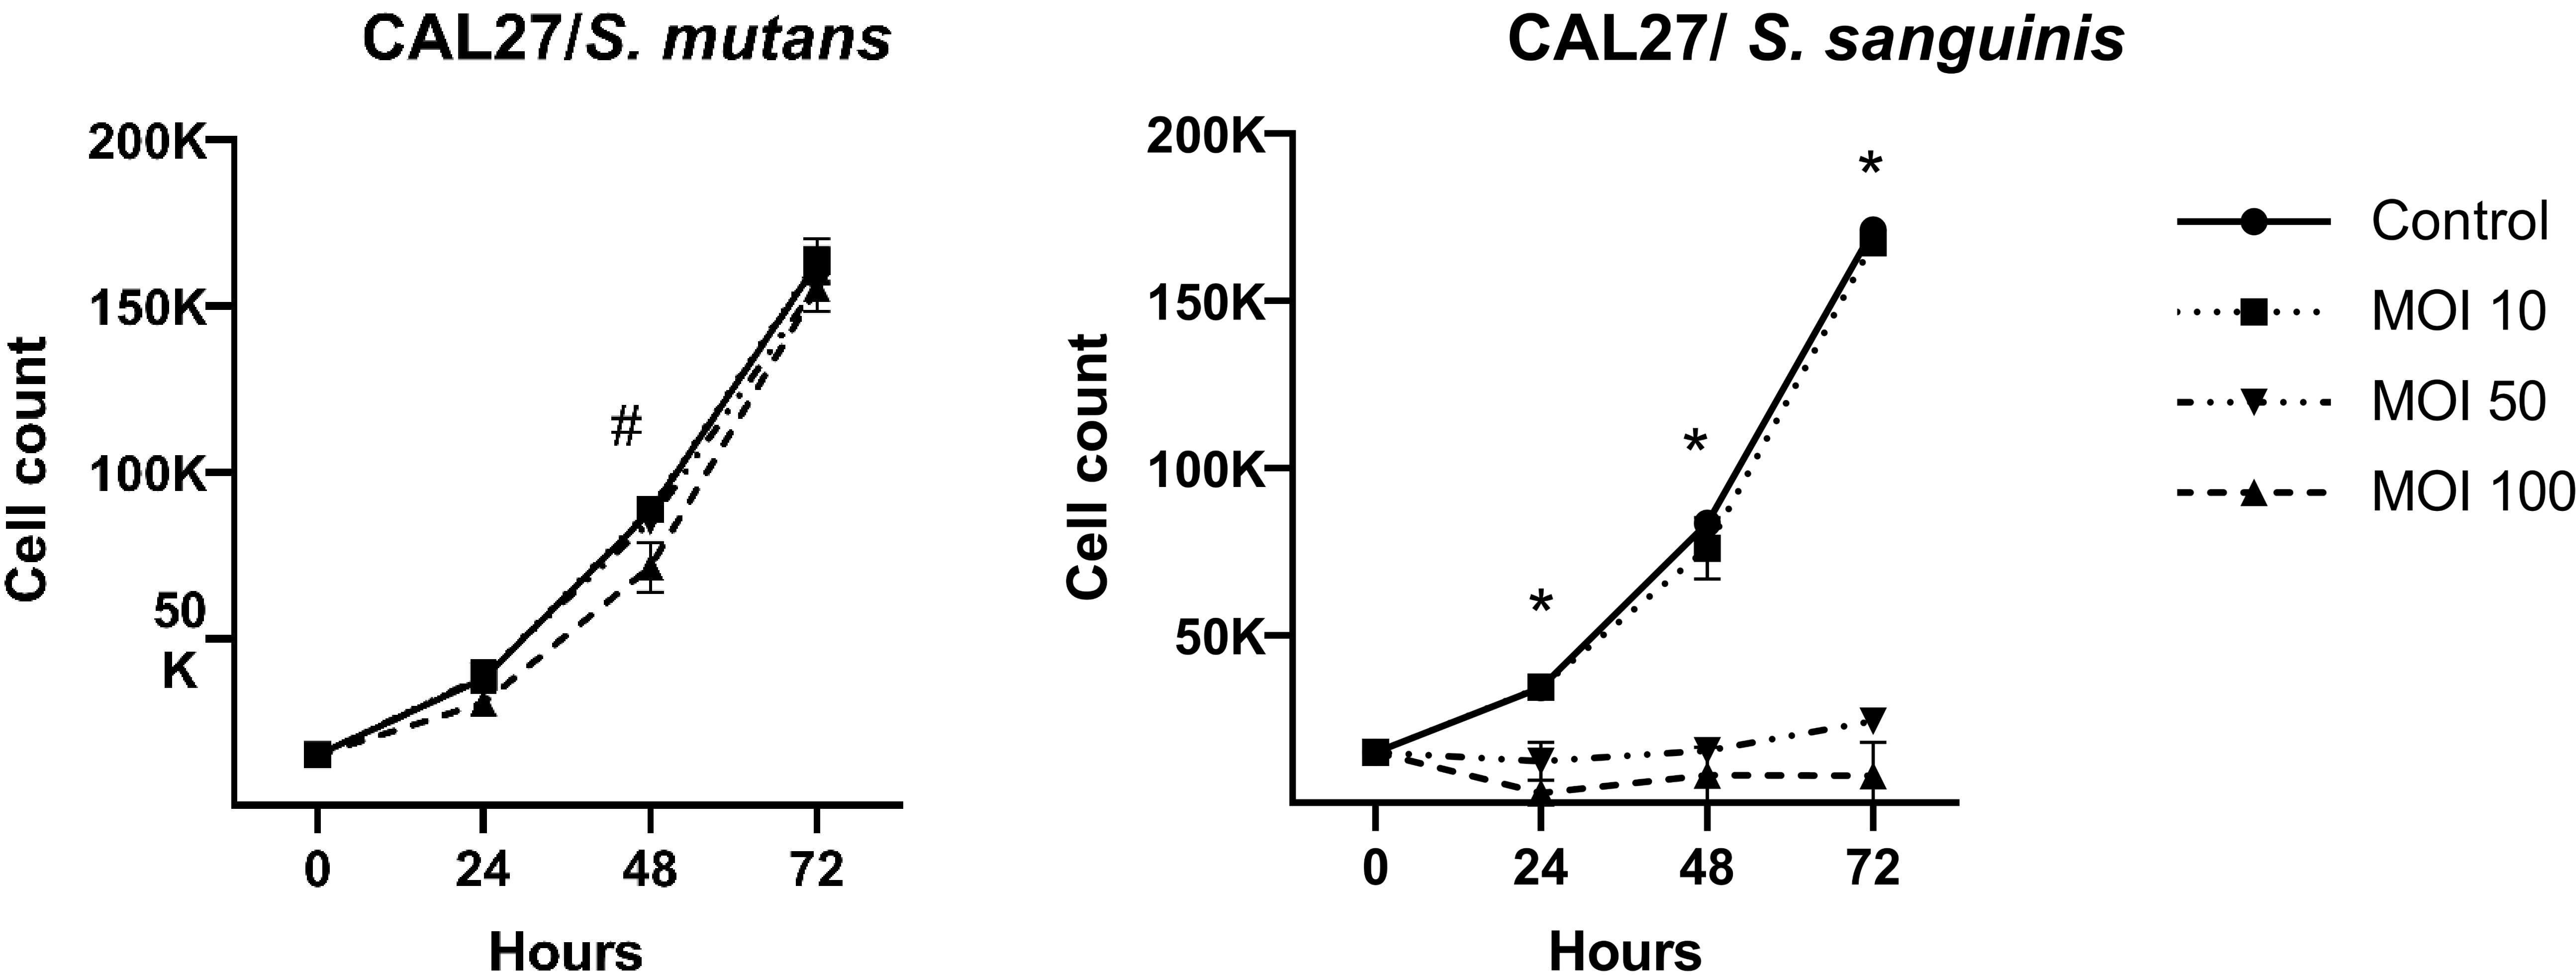

Significant difference for \* all concentrations; ¶ MOI 50 and 100; # MOI 100; § MOI 10 ; ^ MOI 50; v MOI 10 and 50; \$ MOI 10 and 100

**Supplementary Figure 14.** Percent reduction in cell proliferation by *N. flavescens* and *S. mitis* in CAL27, SCC25 SCC4 and TIGKs in cocultures.

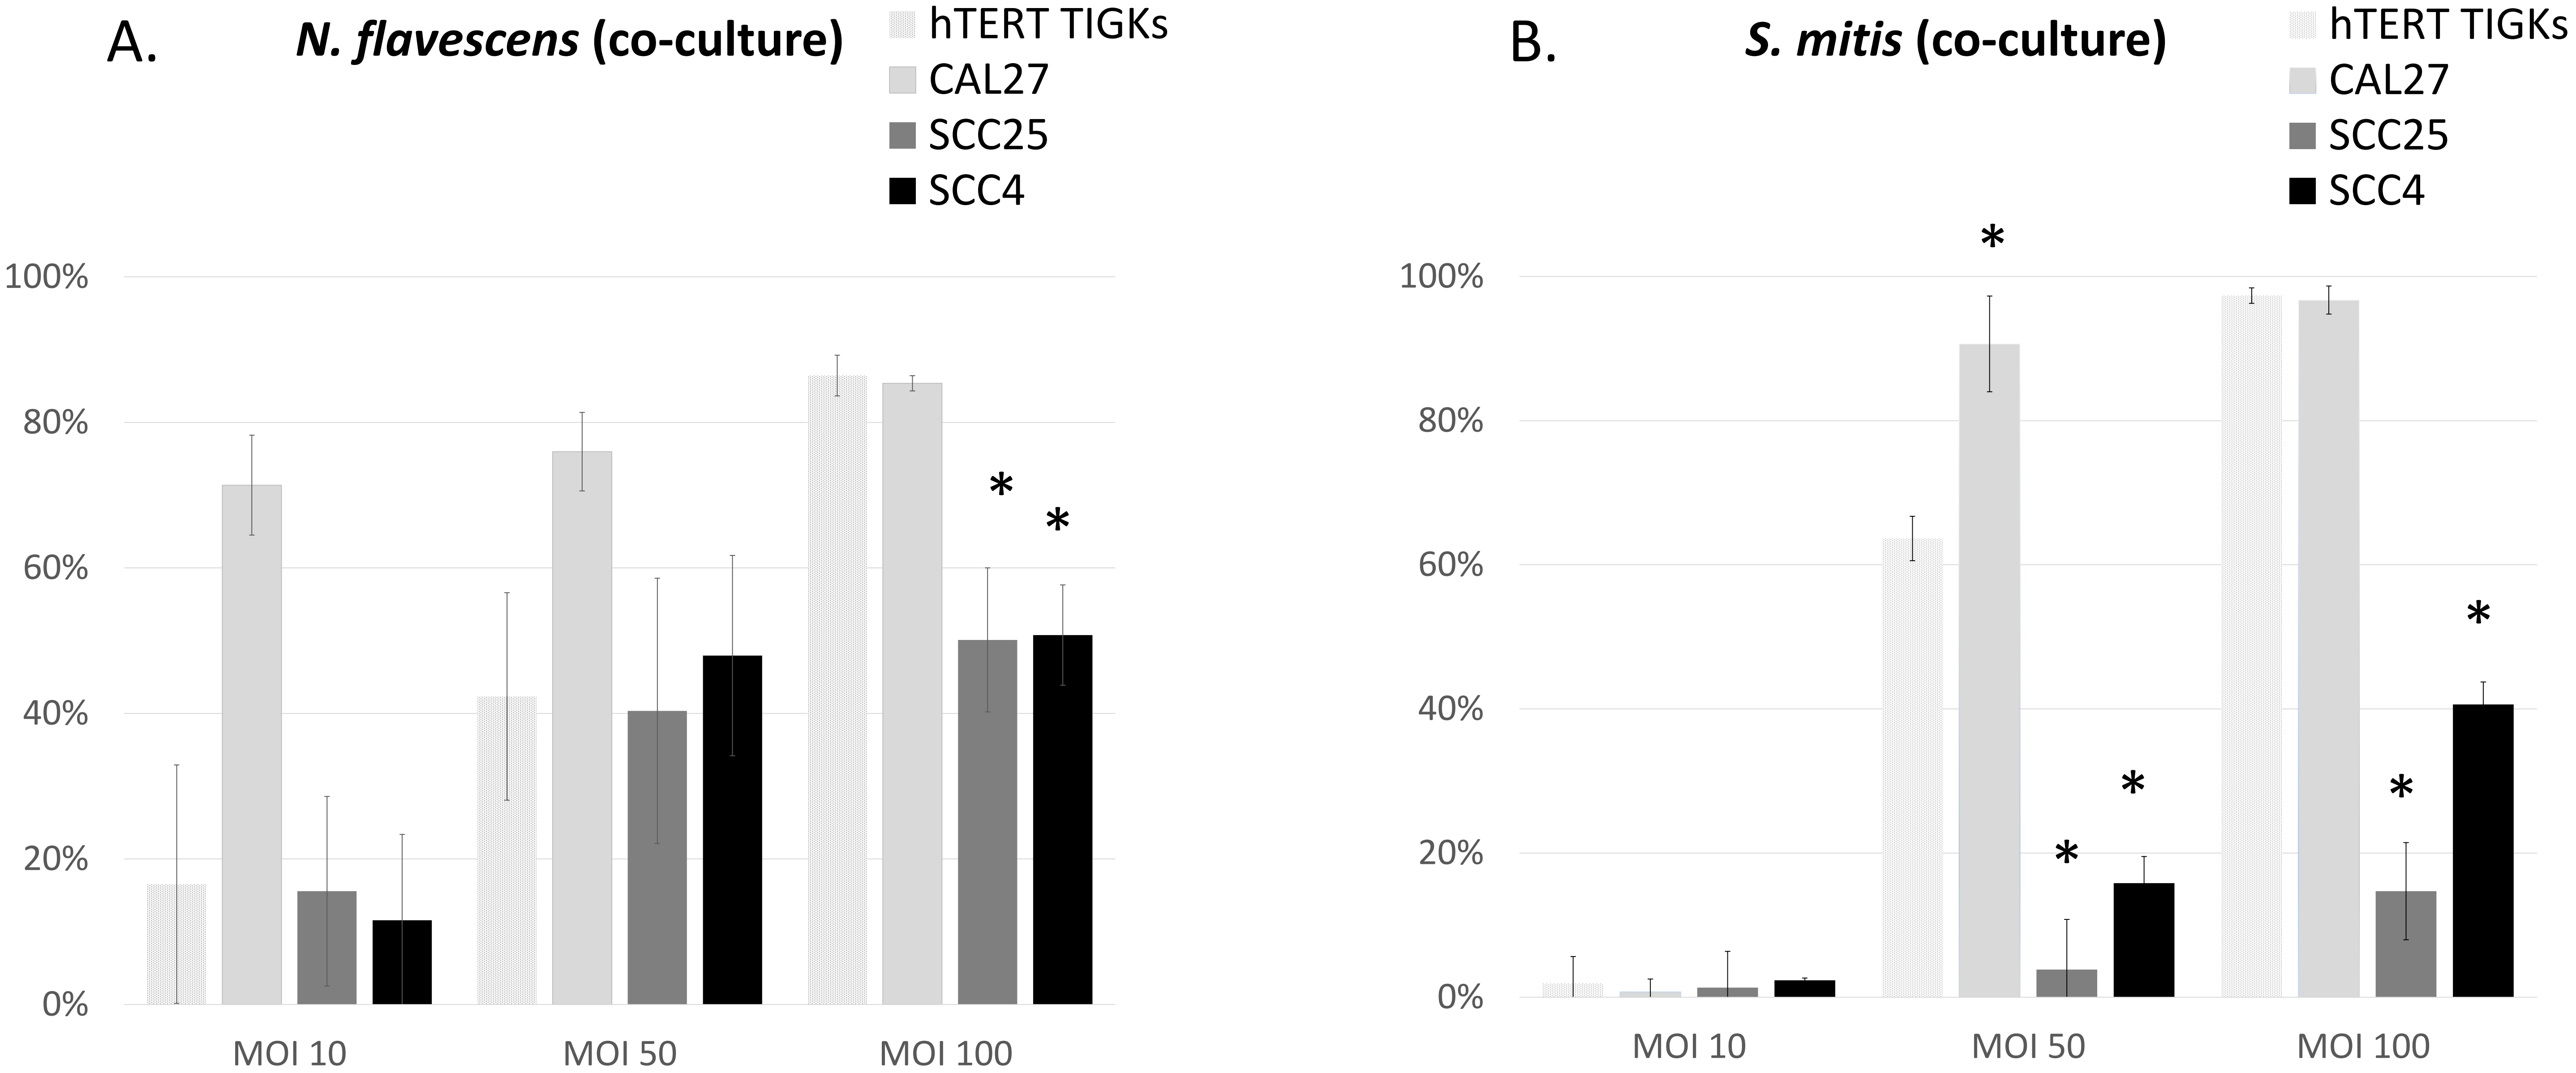

\* Statistically significant ( $p \leq 0.05$ ) compared to TIGKs; pair-wise Student's t-test.



Supplementary Figure 15. Staining of intracellular *N. flavescens* and *H. parainfluenzae* (CAL27)

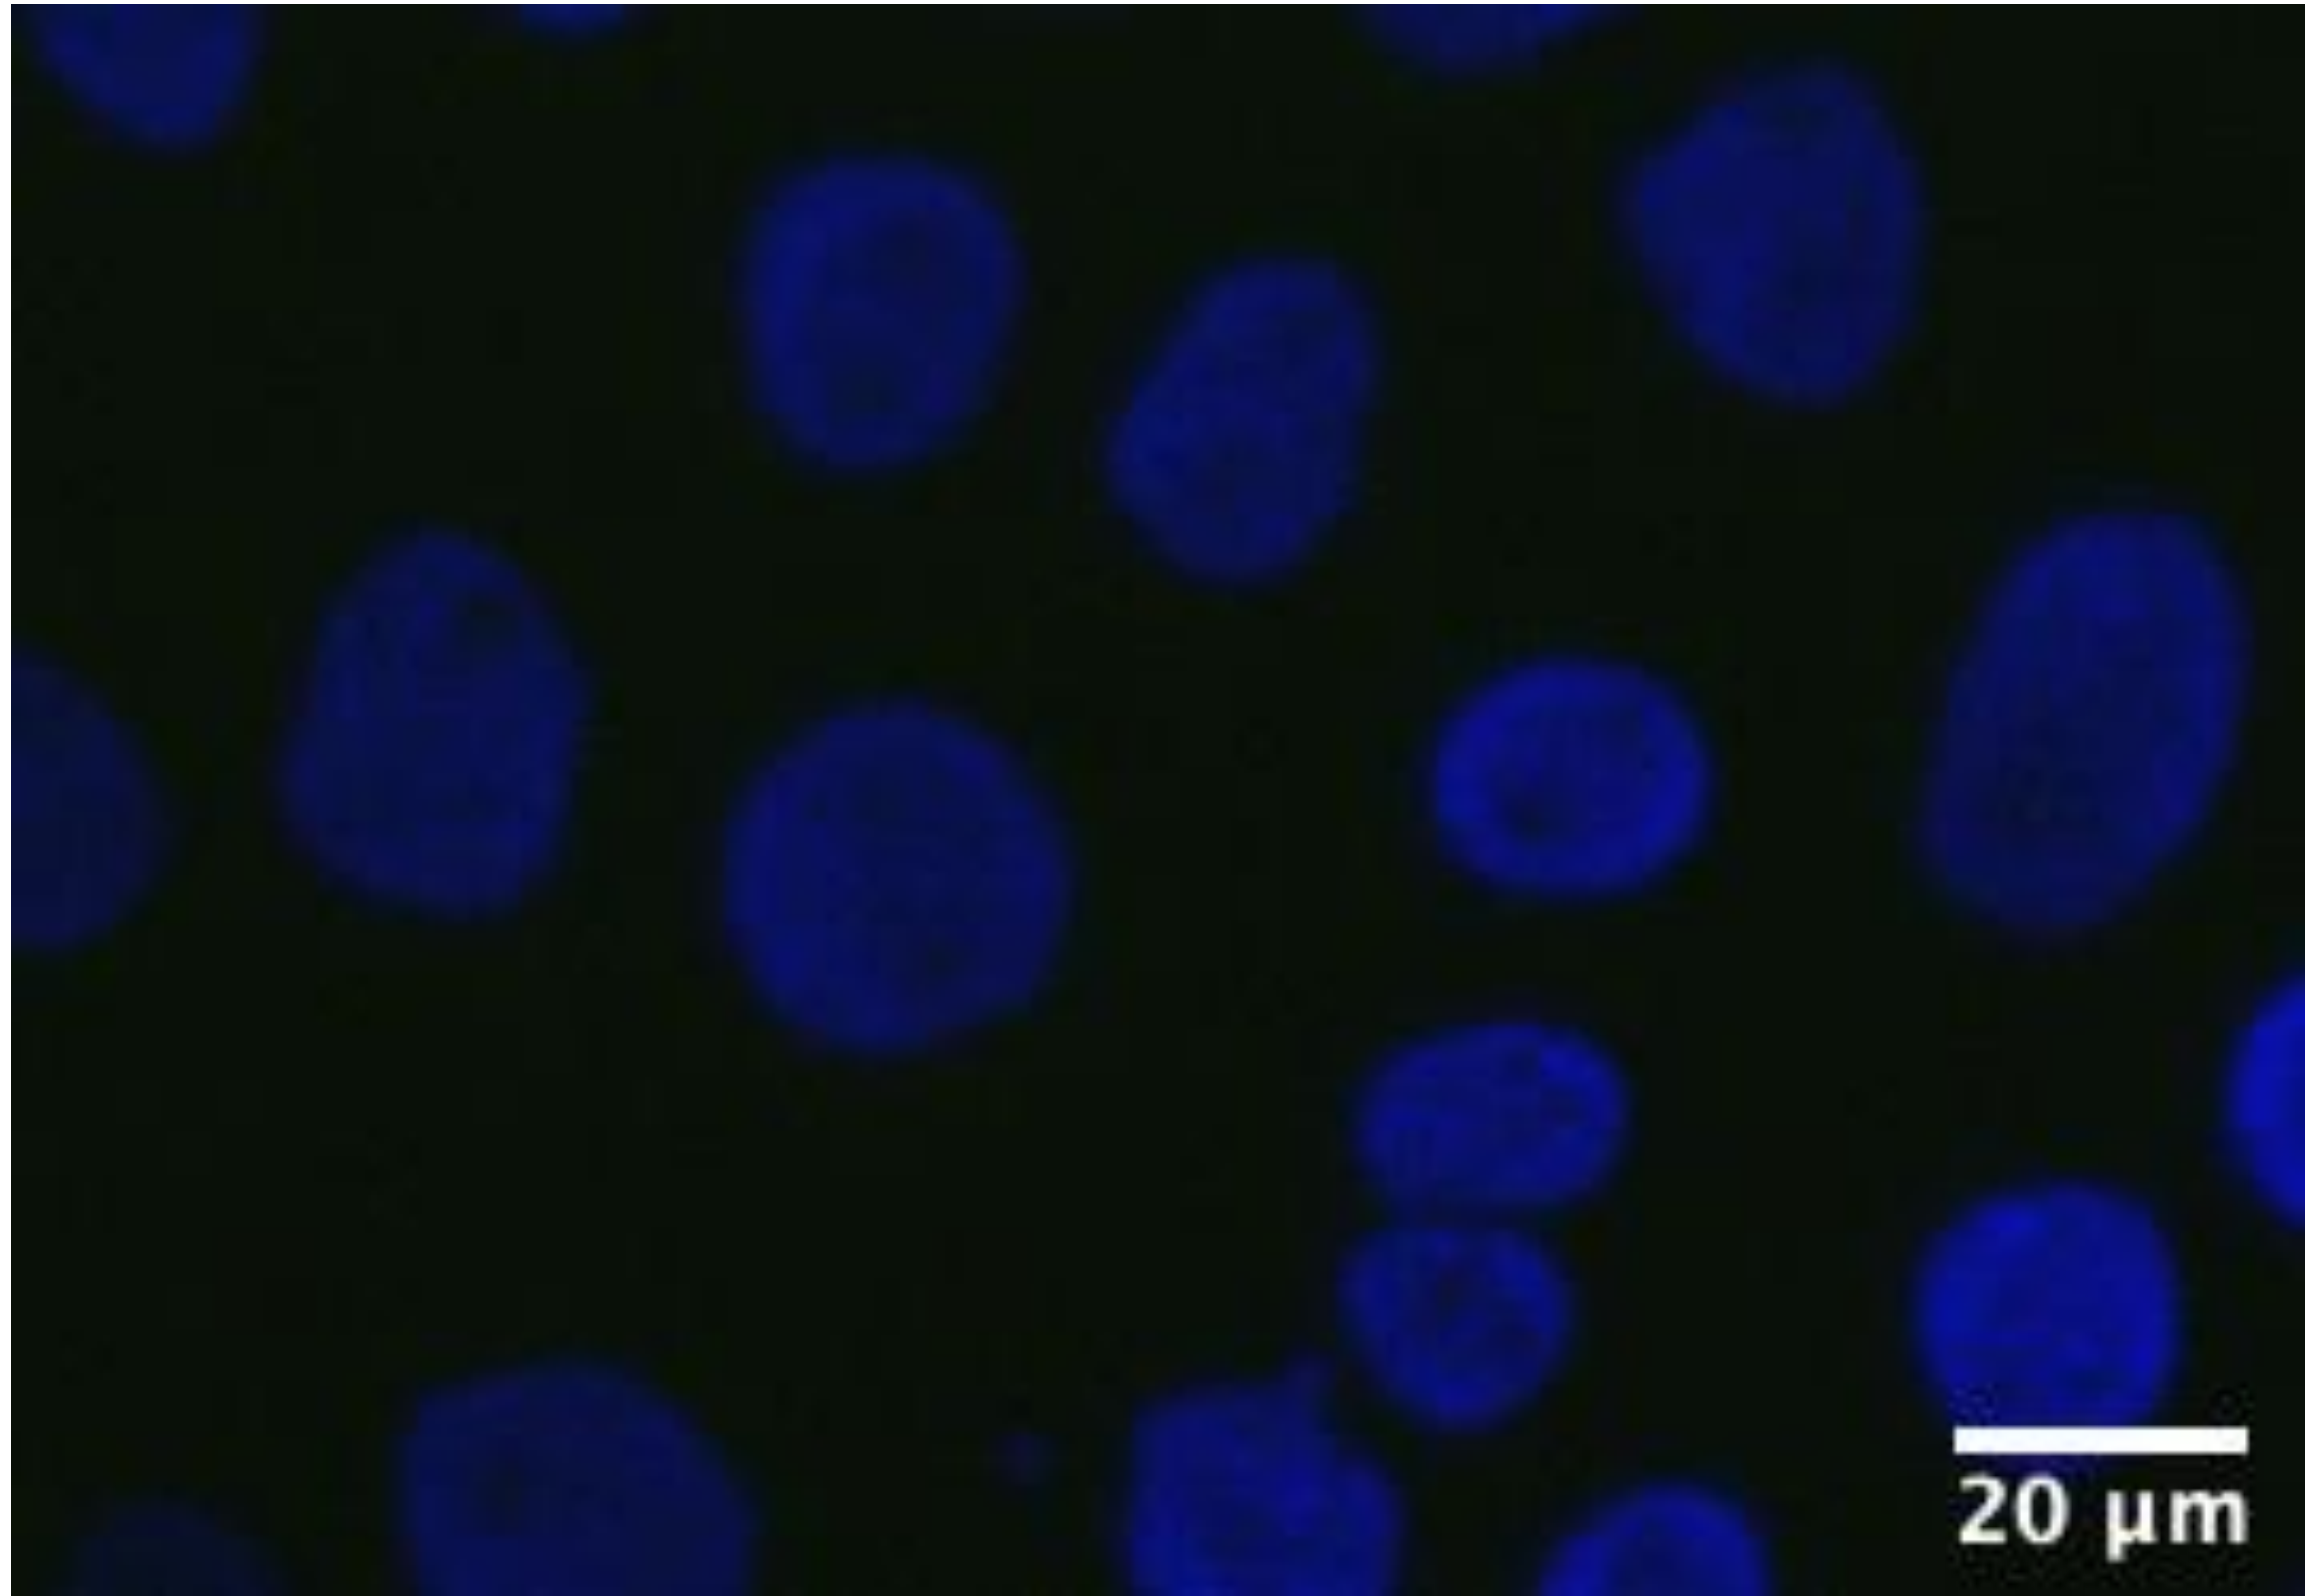

Unexposed

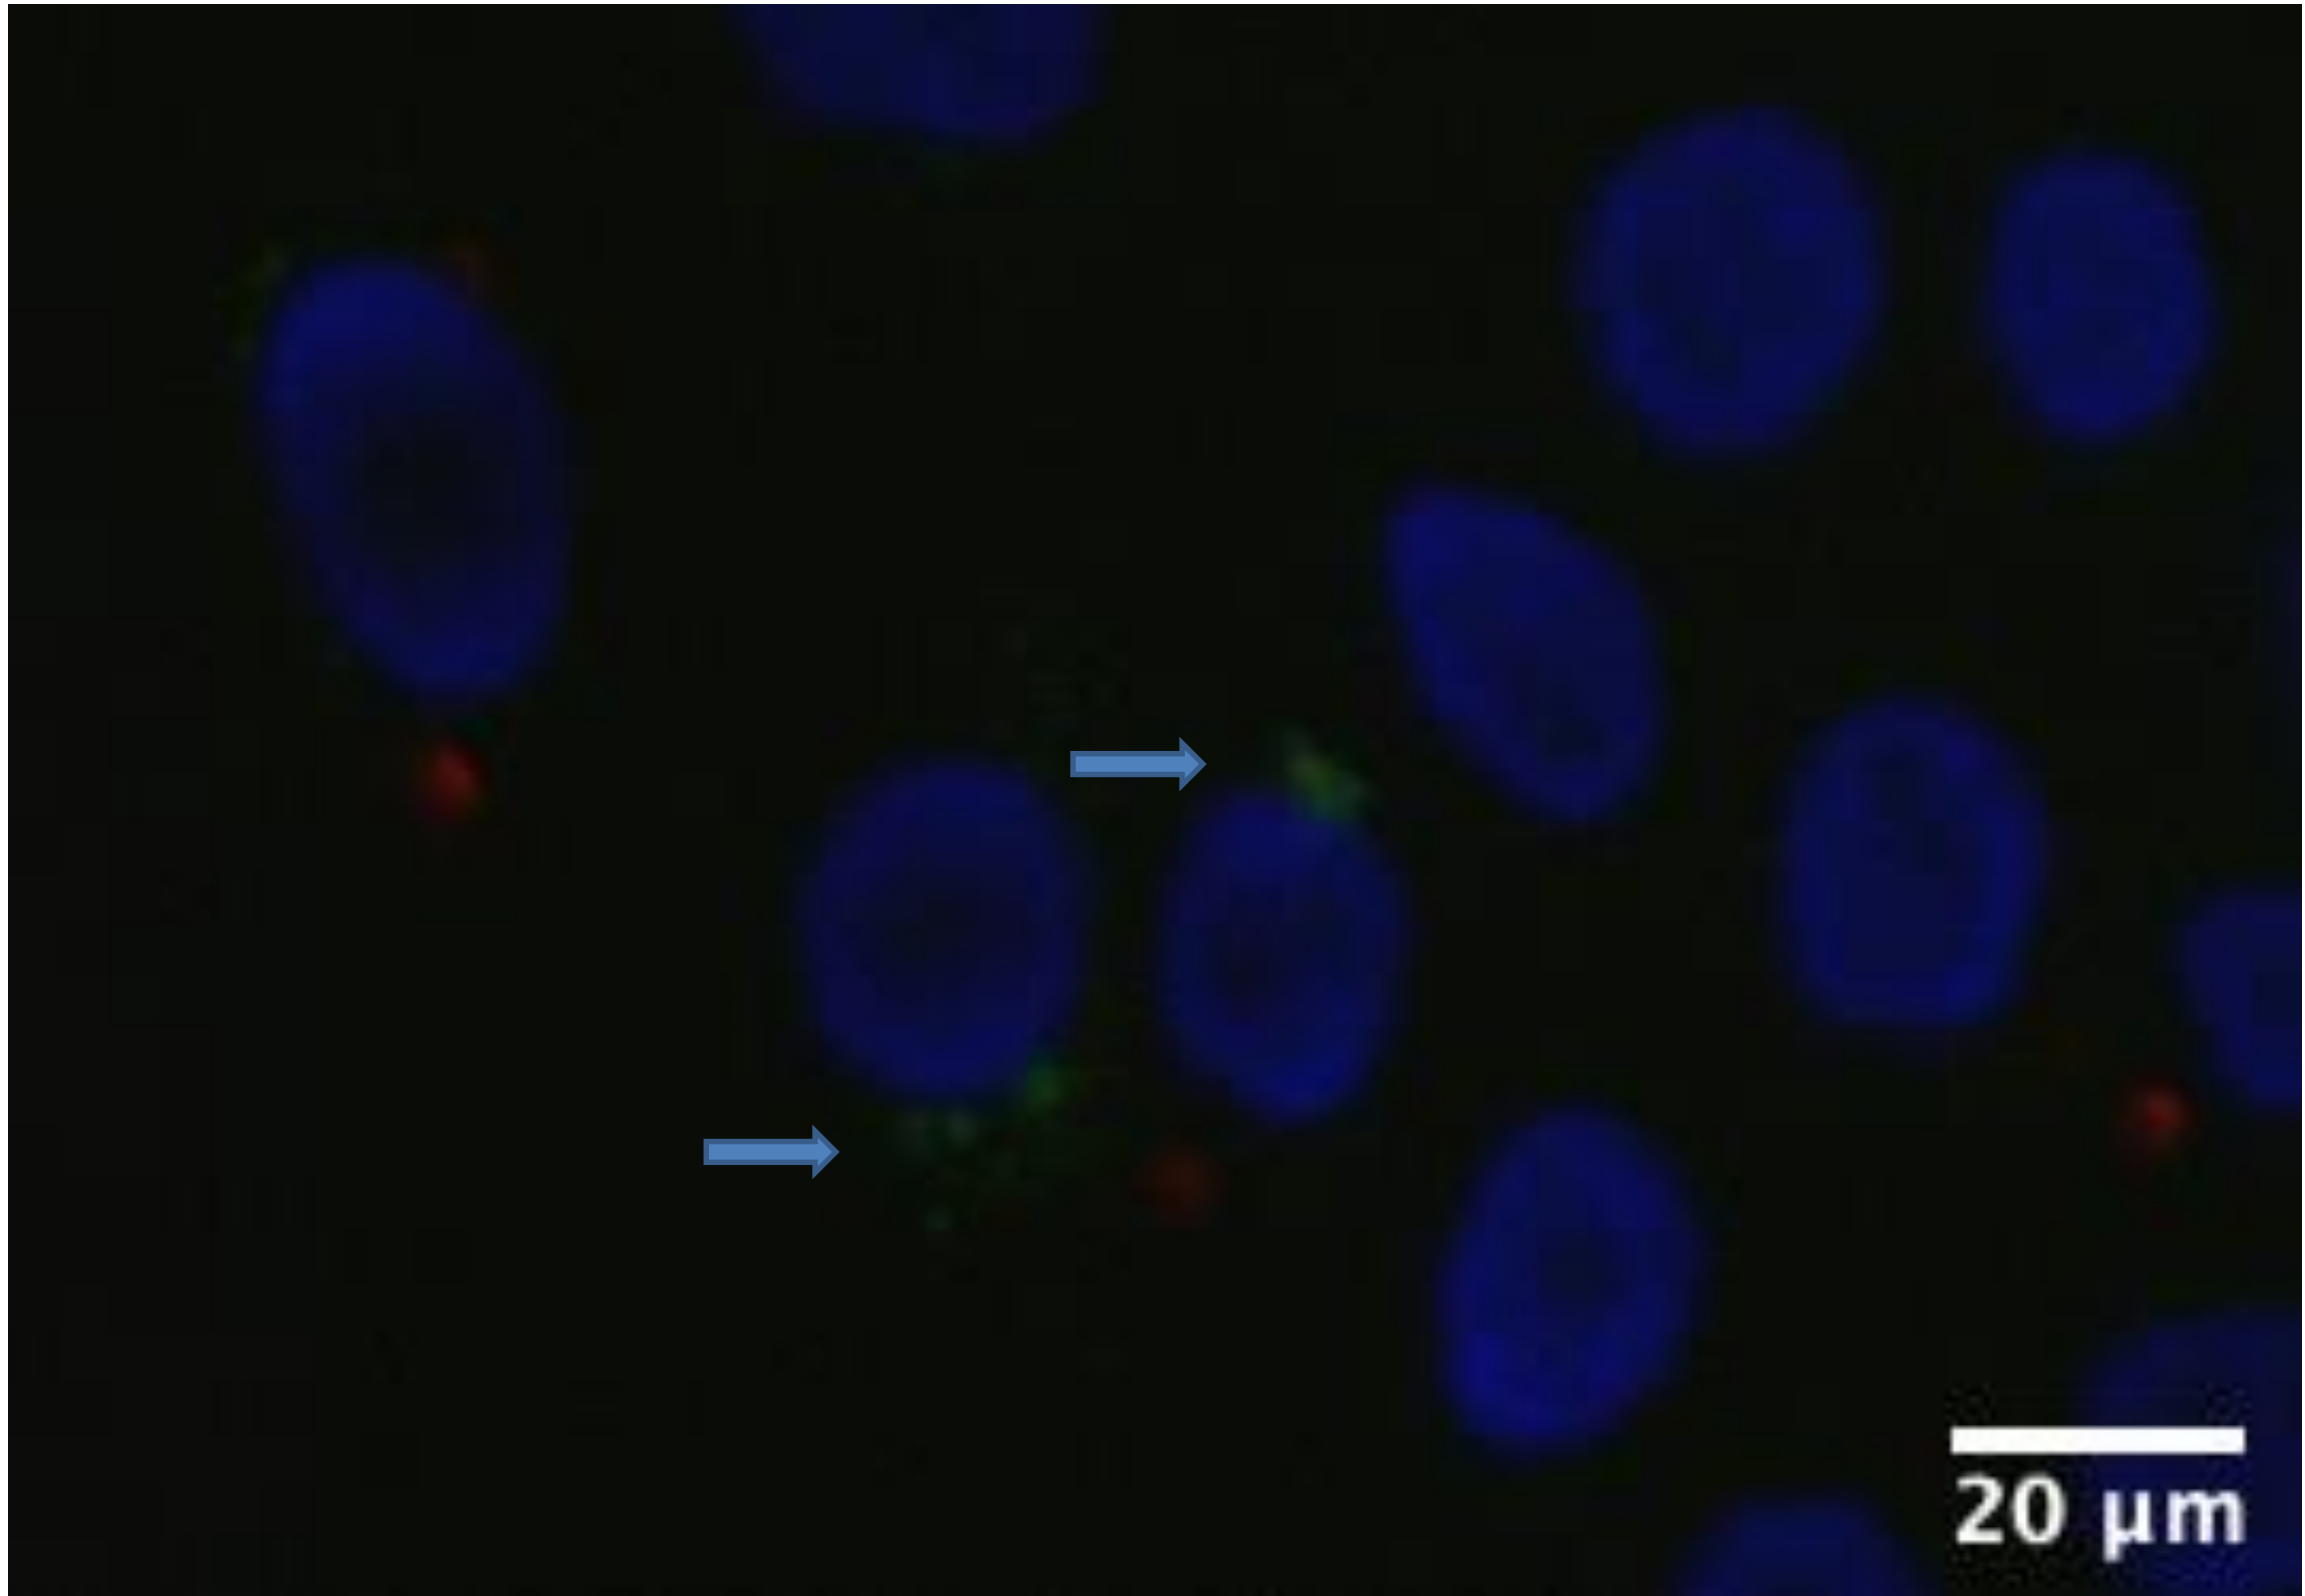

*N. flavescens*

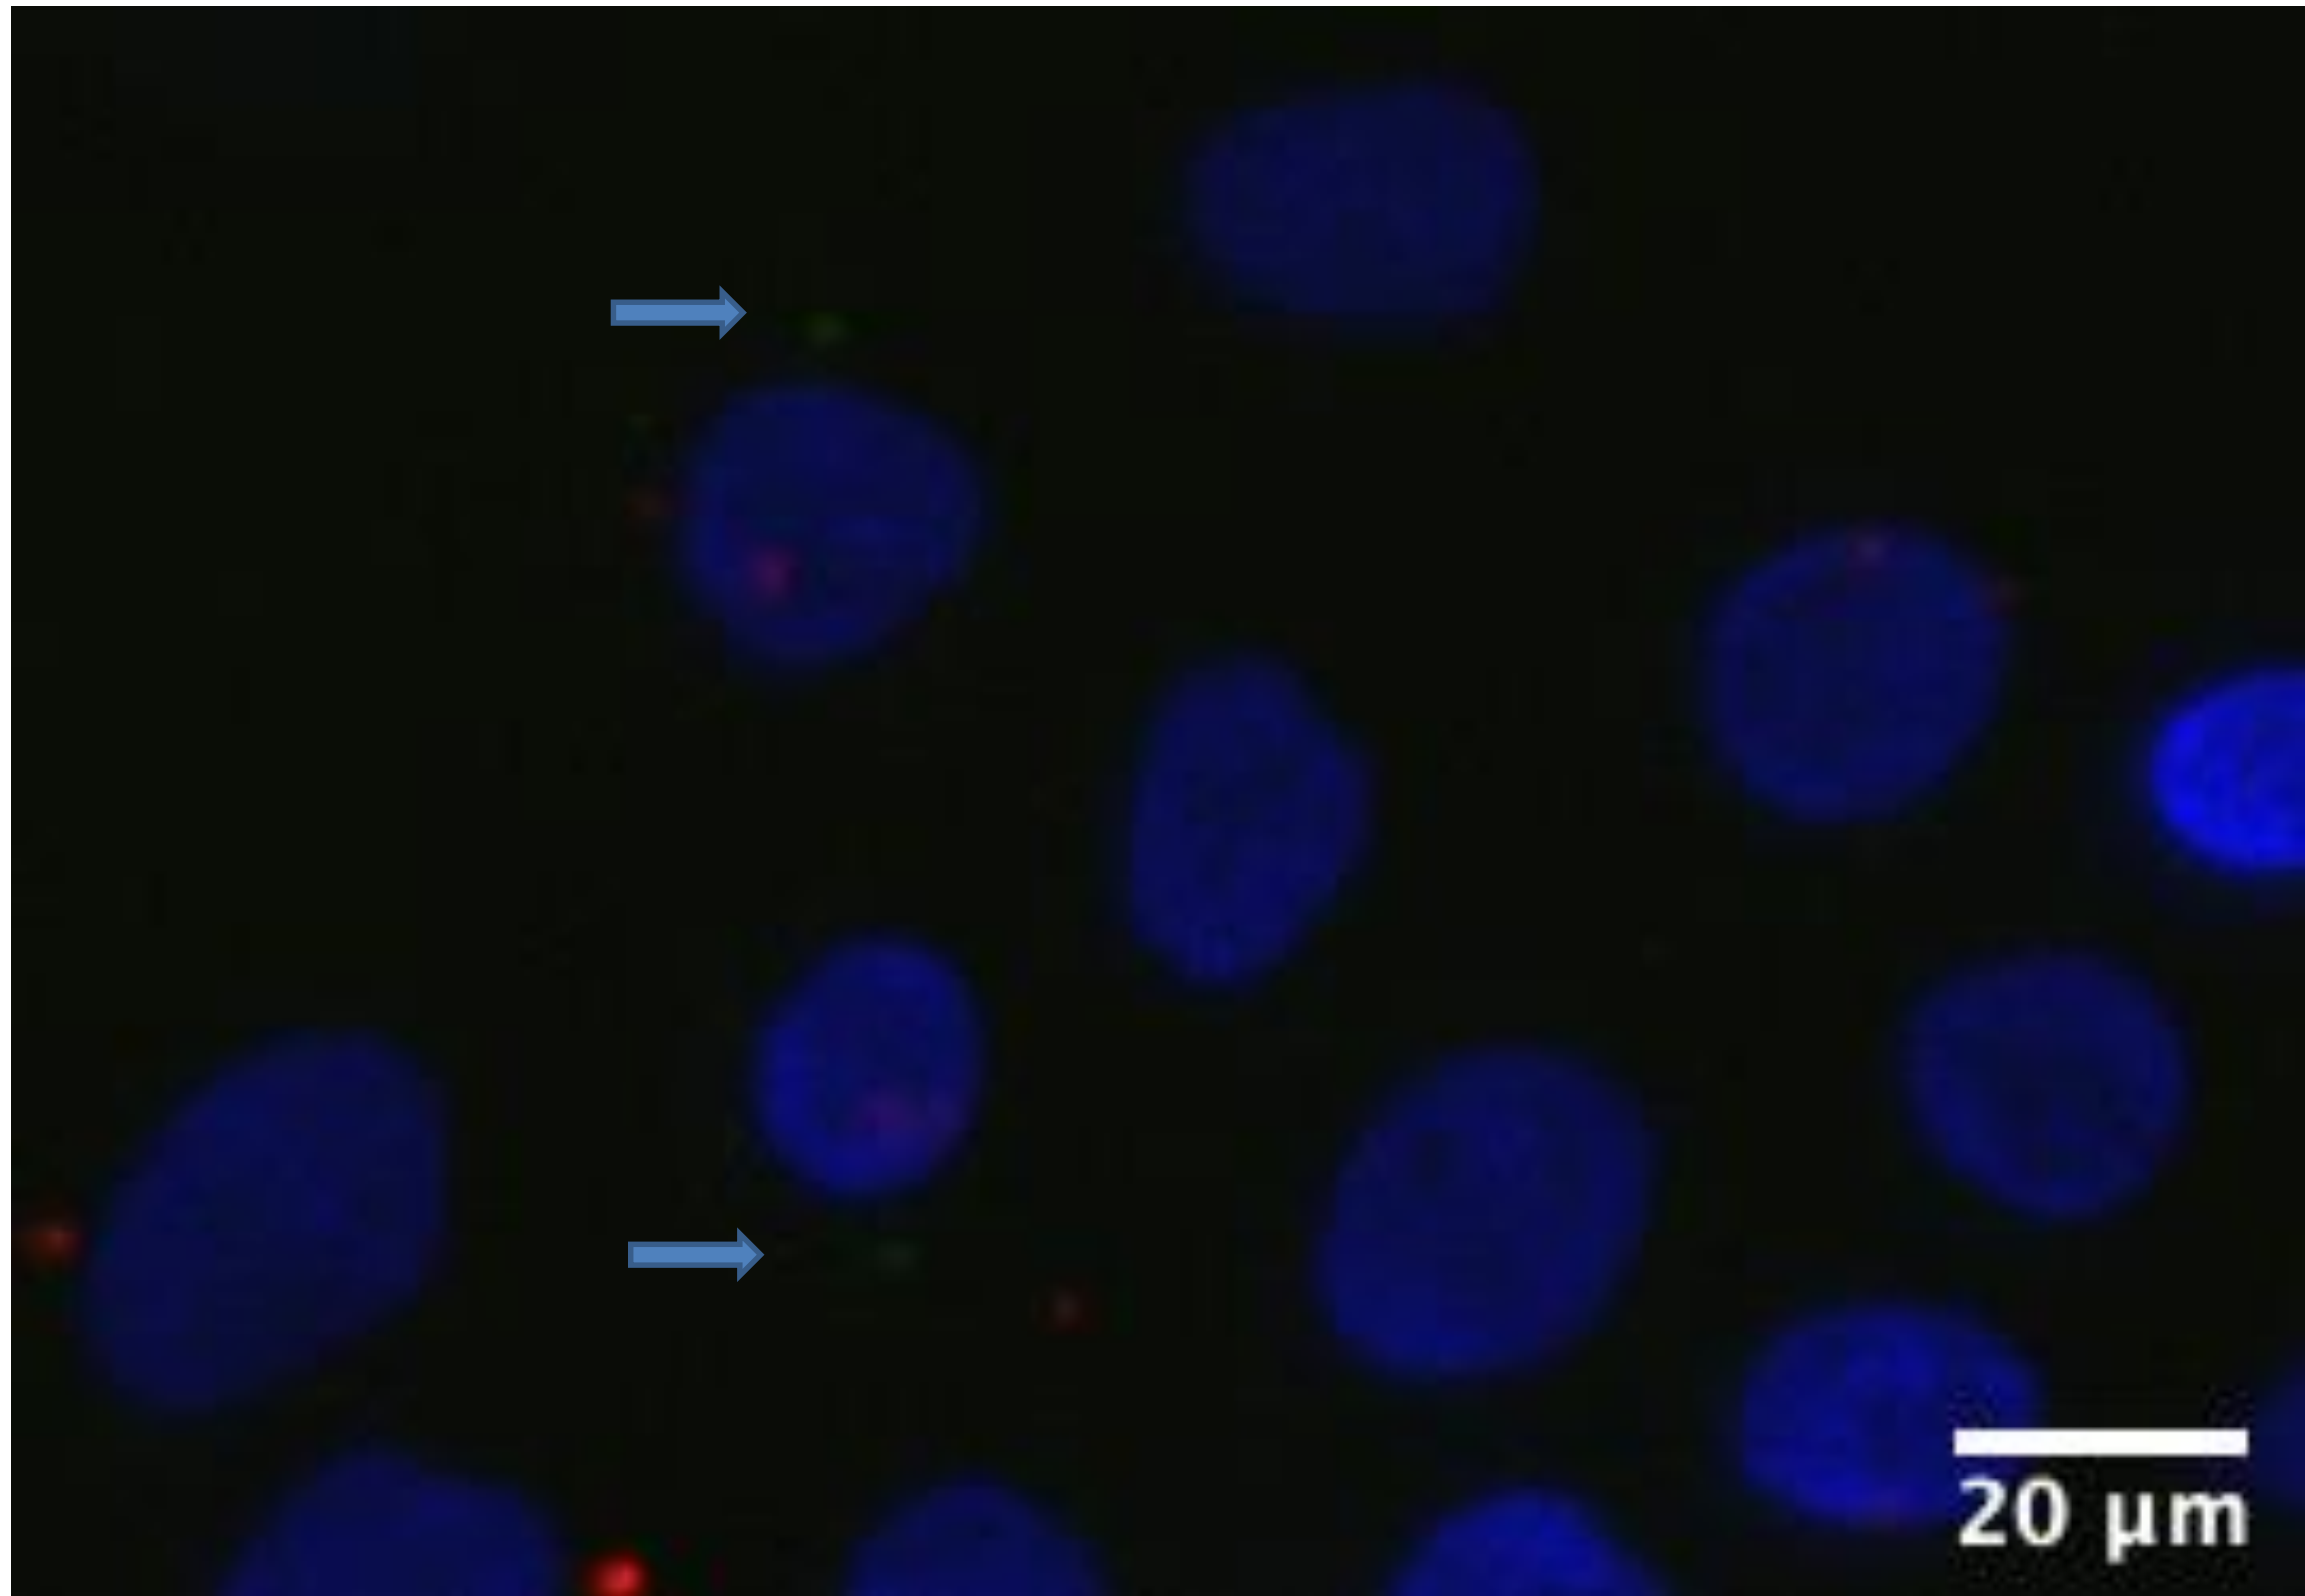

*H. parainfluenzae*

**Color scheme**

- Blue : nucleus
- Green : Intracellular bacteria
- Red: Extracellular bacteria

Arrows in the images are pointing to intracellular bacteria with green stain



Supplementary Figure 16. Staining of intracellular *N. flavescens* and *H. parainfluenzae* (SCC25)

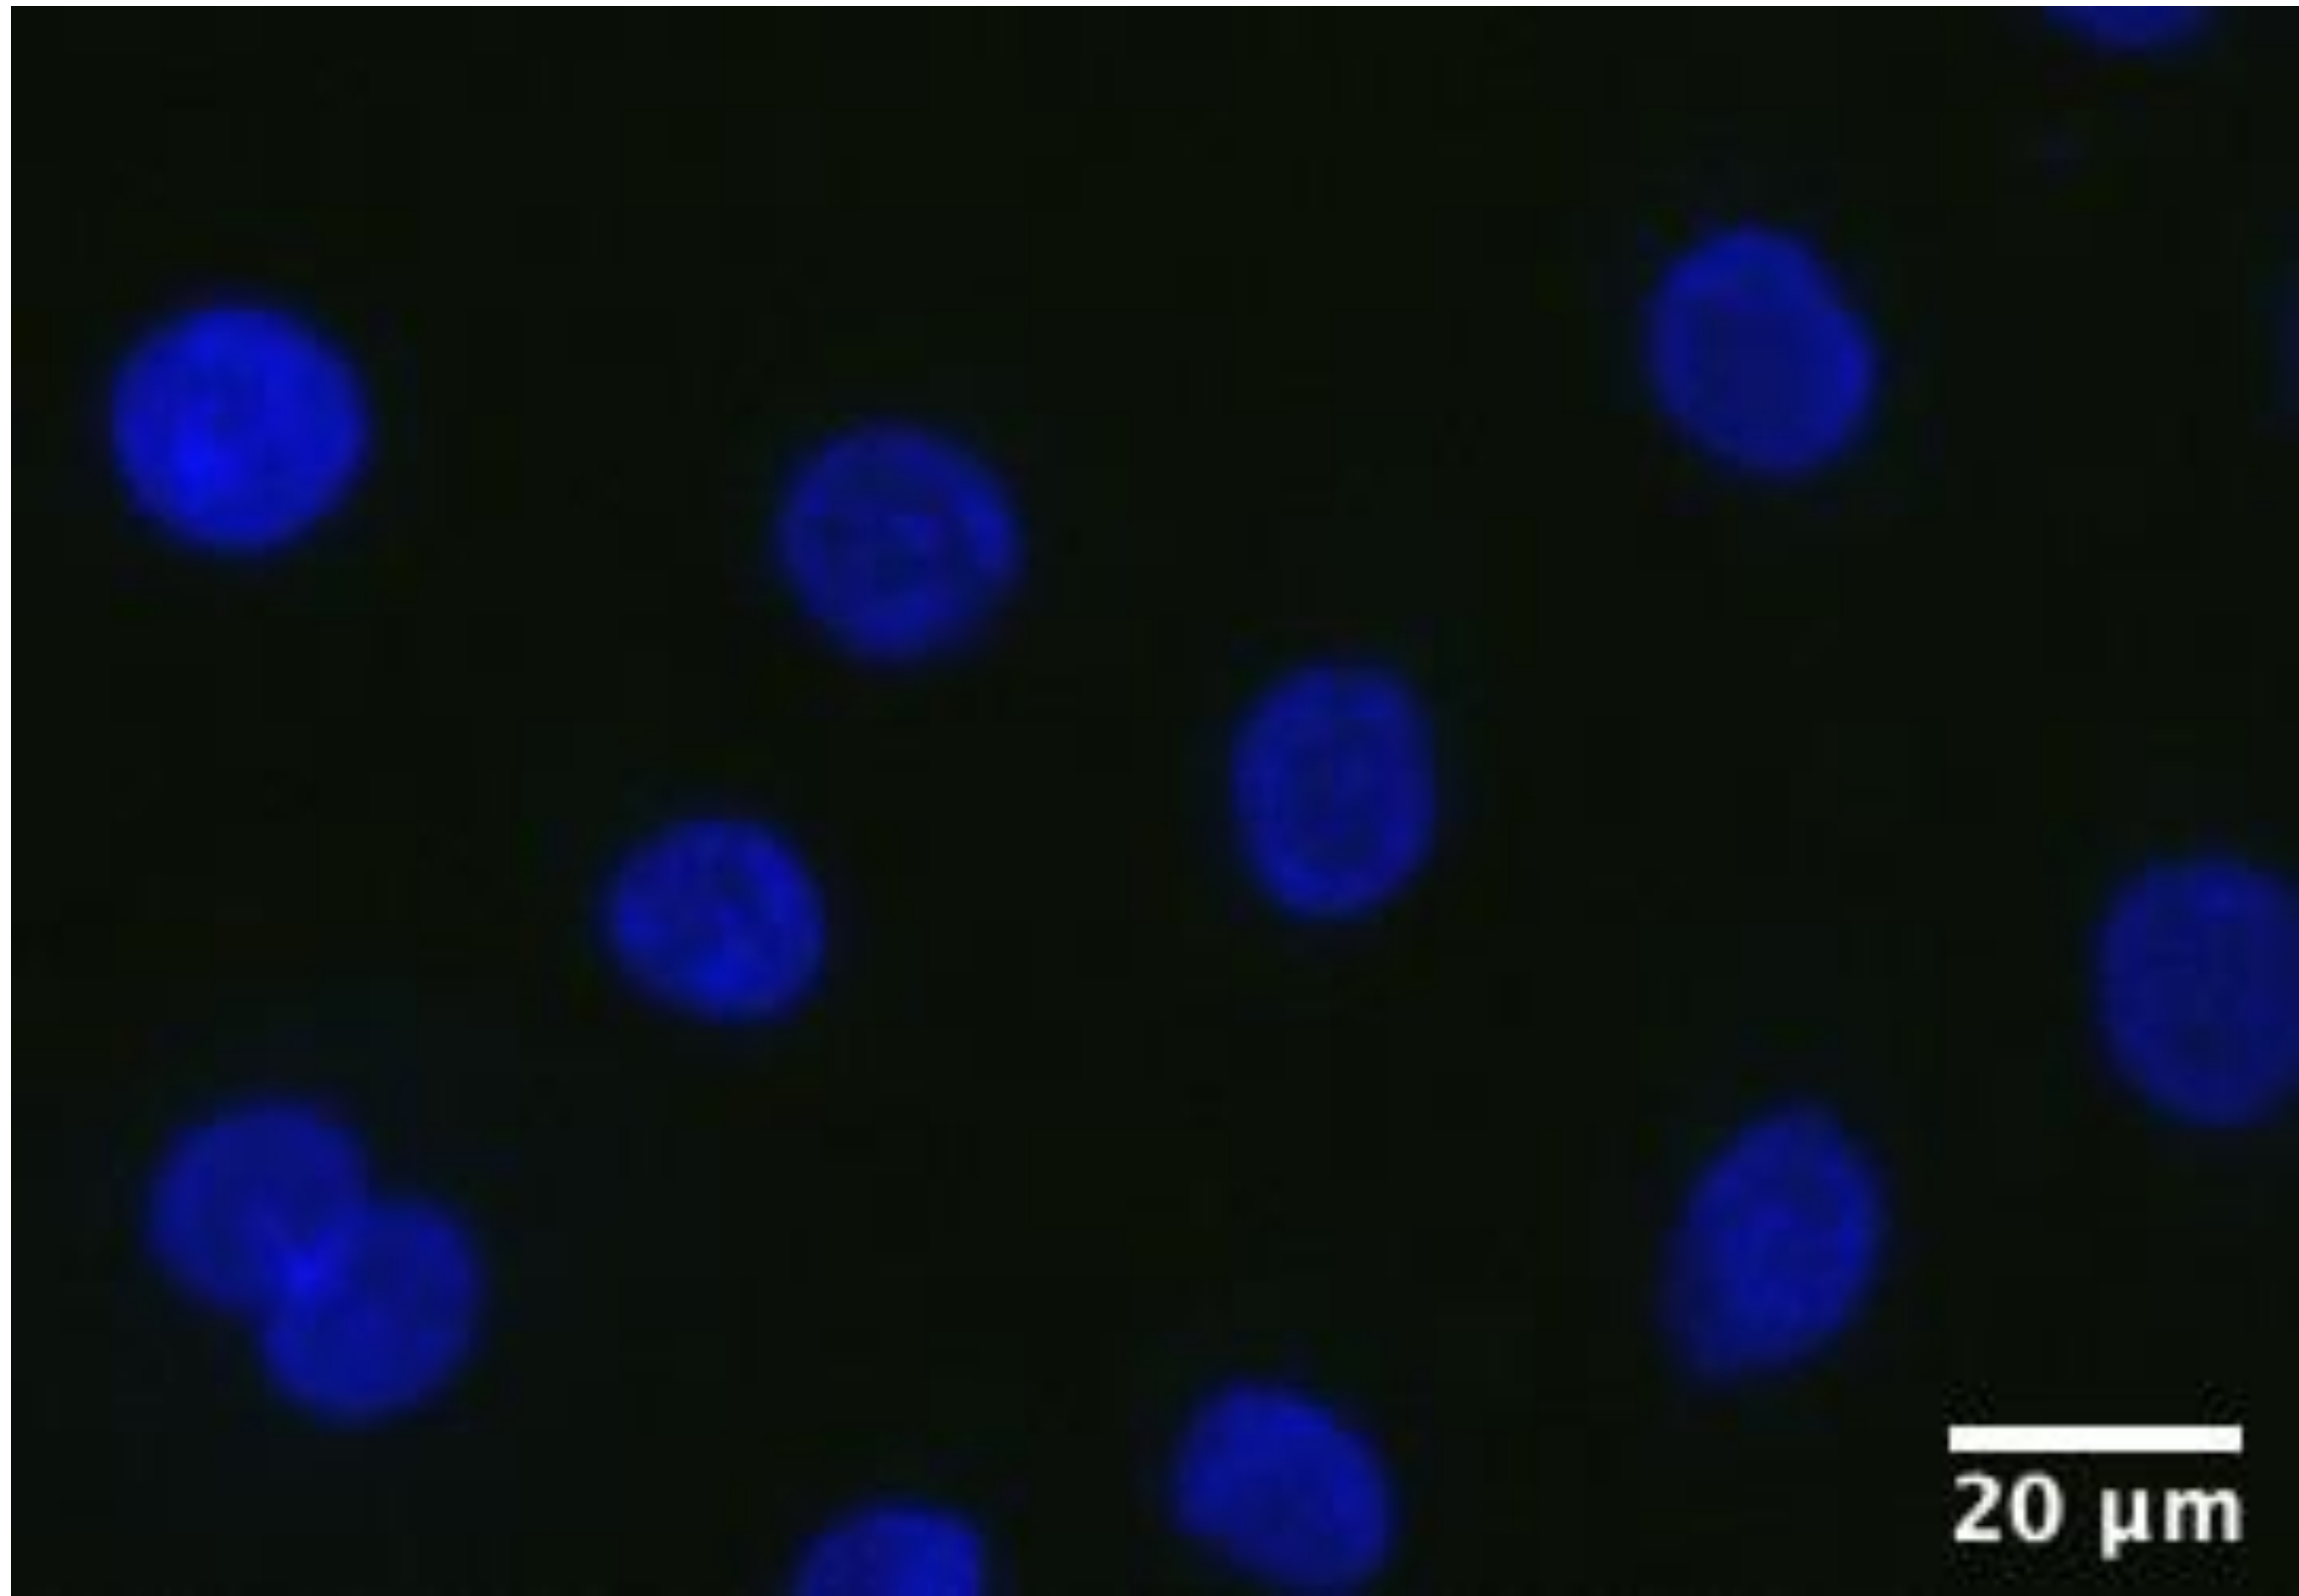

Unexposed

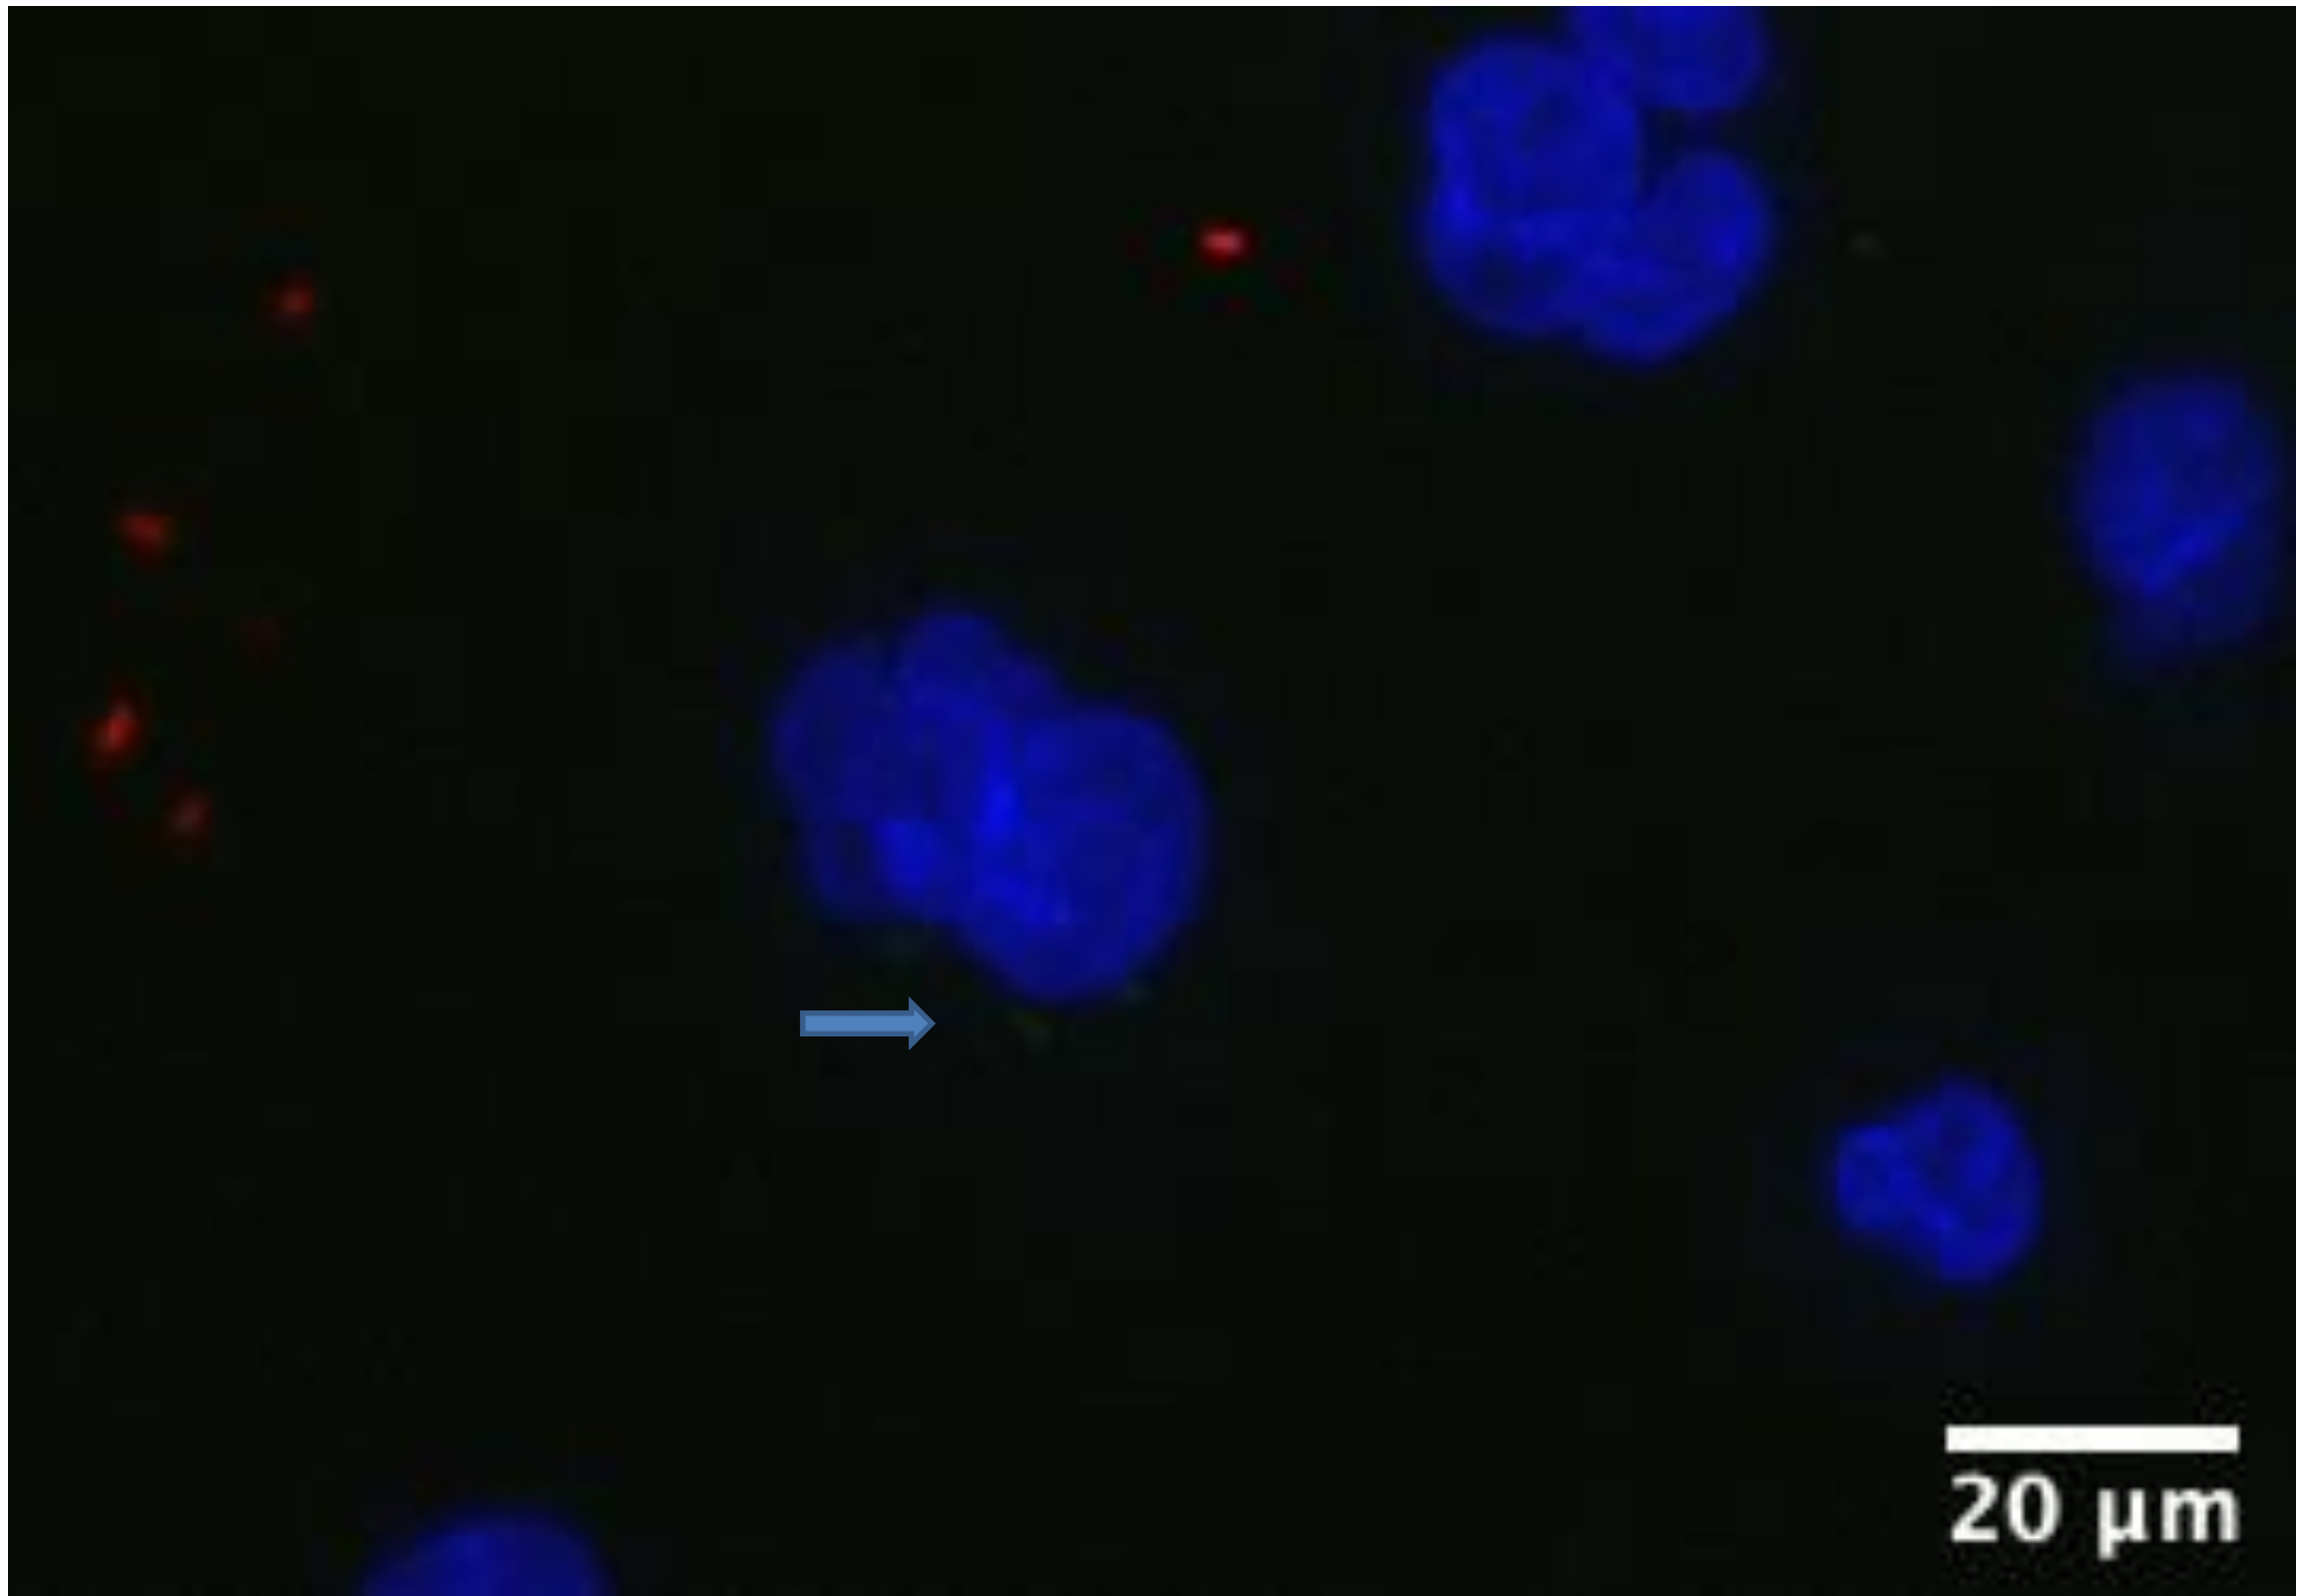

*N. flavescens*

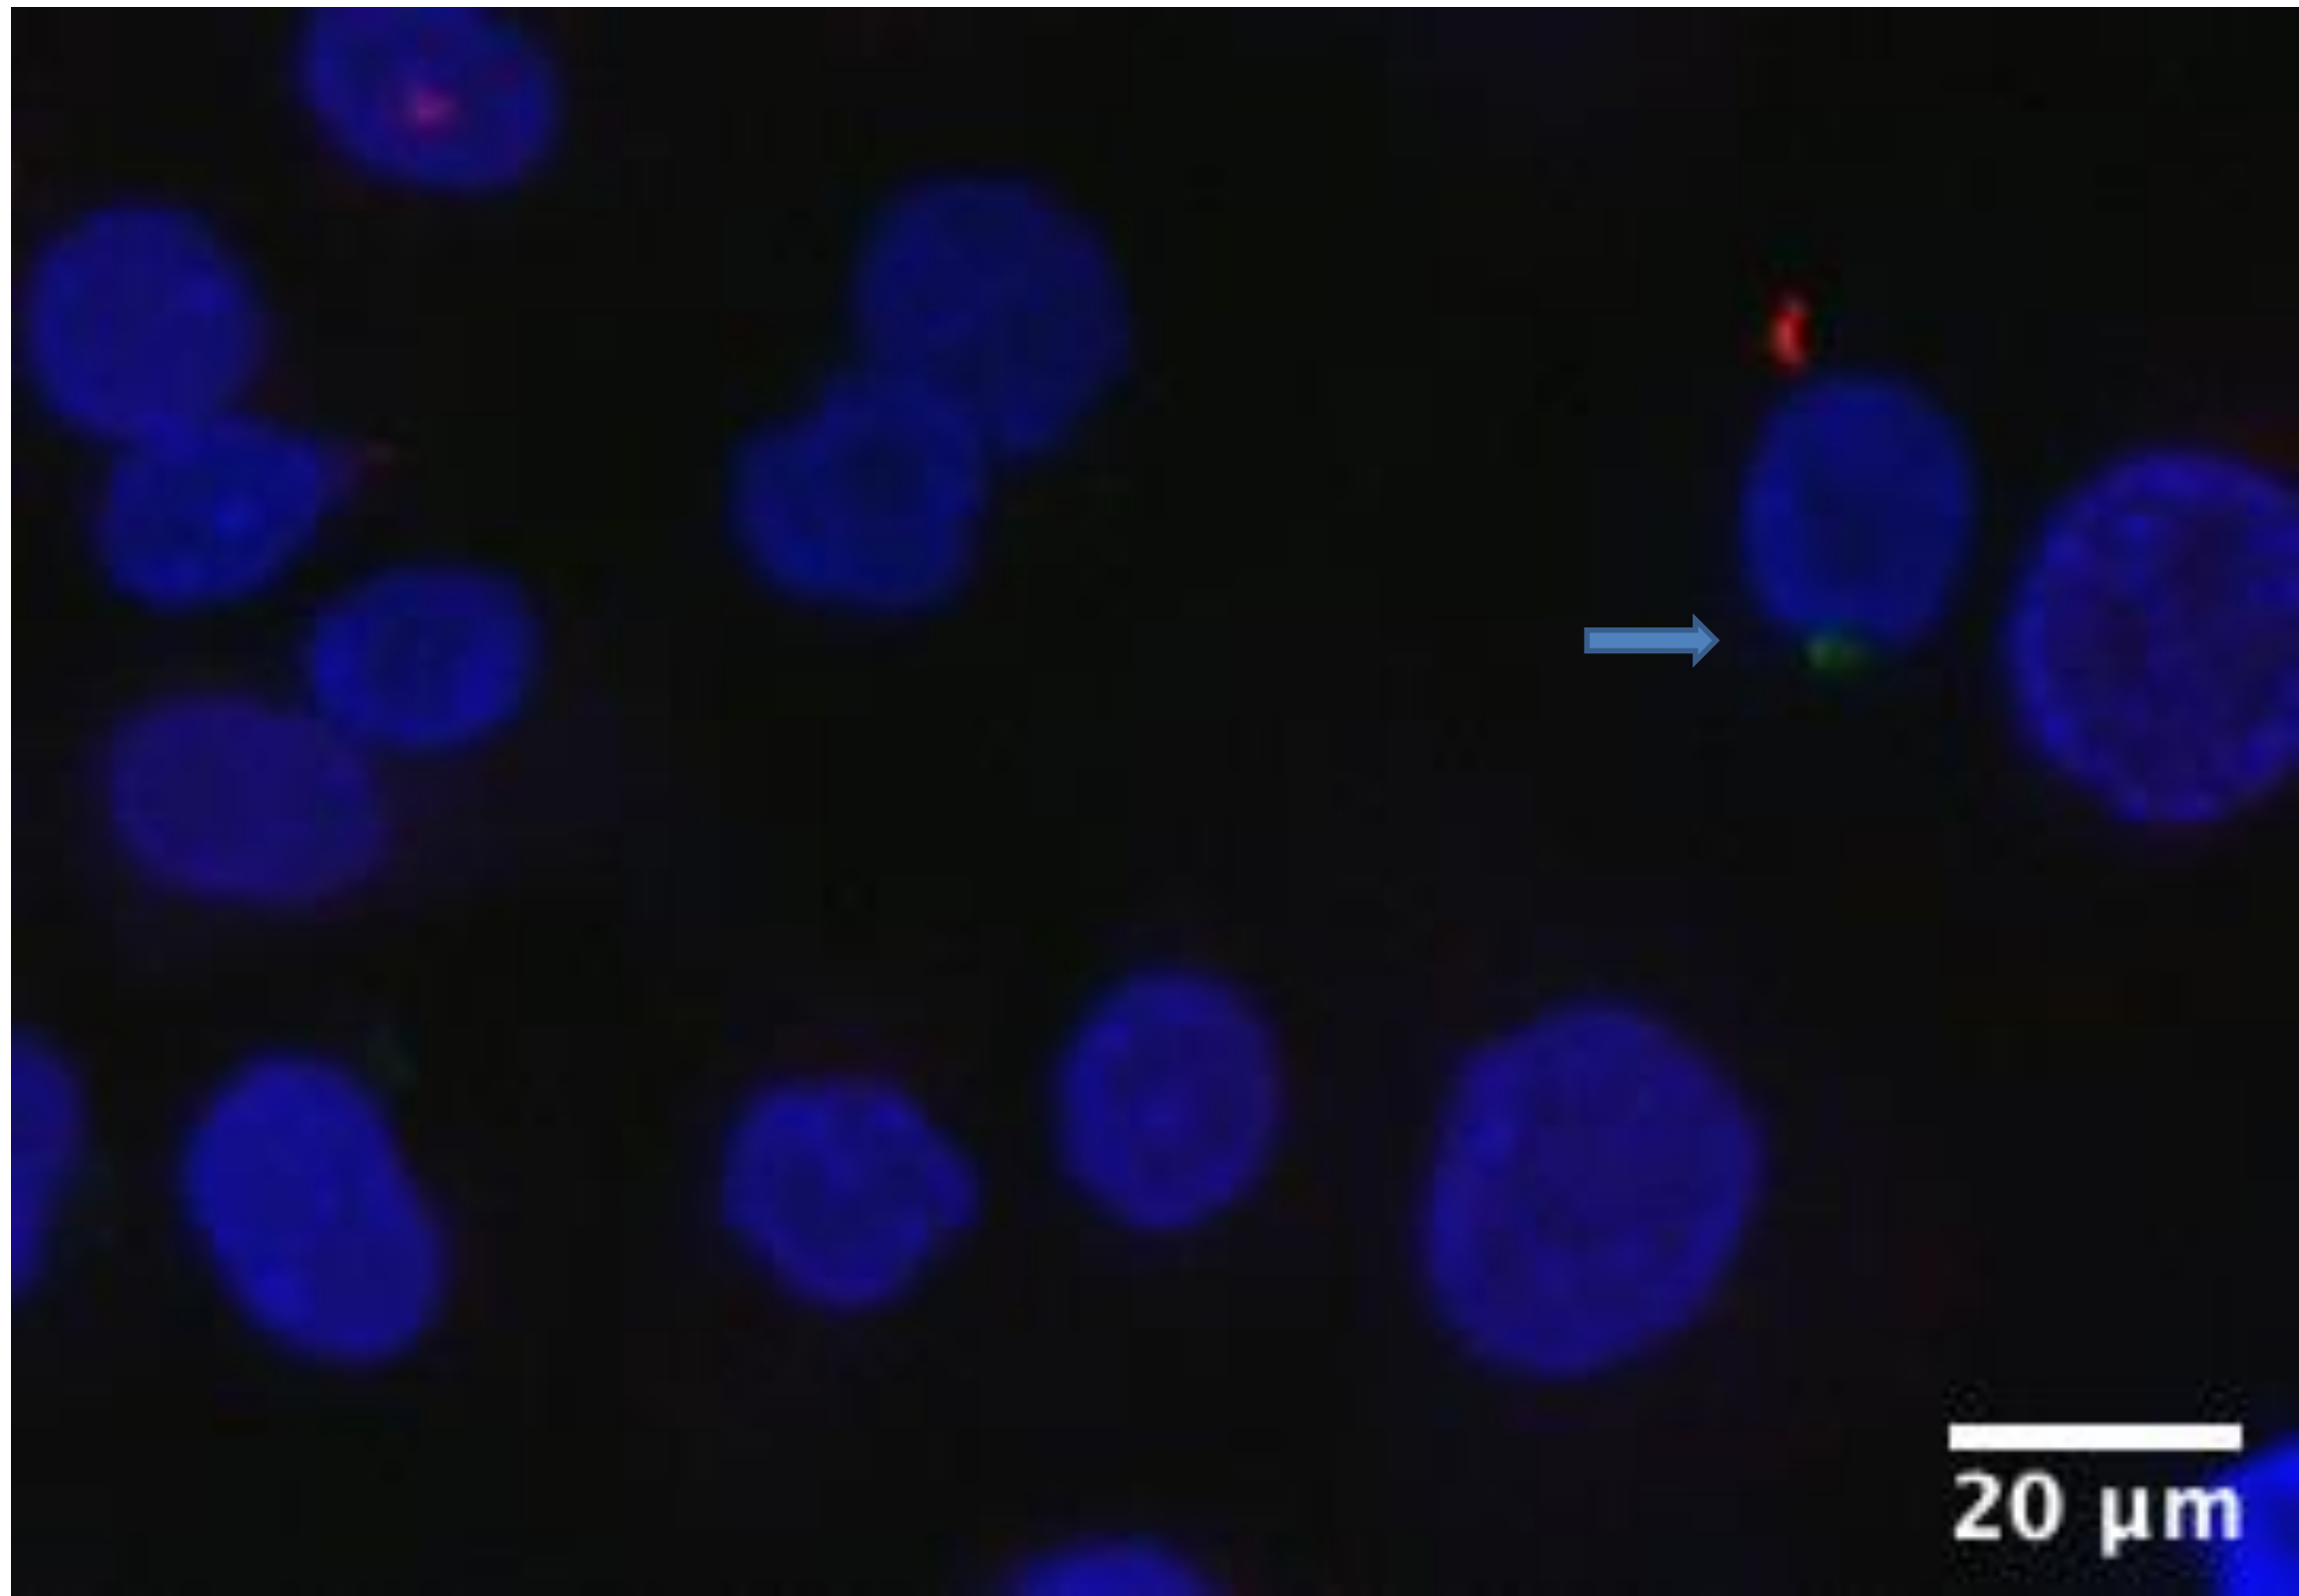

*H. parainfluenzae*

**Color scheme**

- Blue : nucleus
- Green : Intracellular bacteria
- Red: Extracellular bacteria

Arrows in the images are pointing to intracellular bacteria with green stain

# Supplementary Figure 17. Staining of intracellular *N. flavescens* and *H. parainfluenzae* (SCC4)

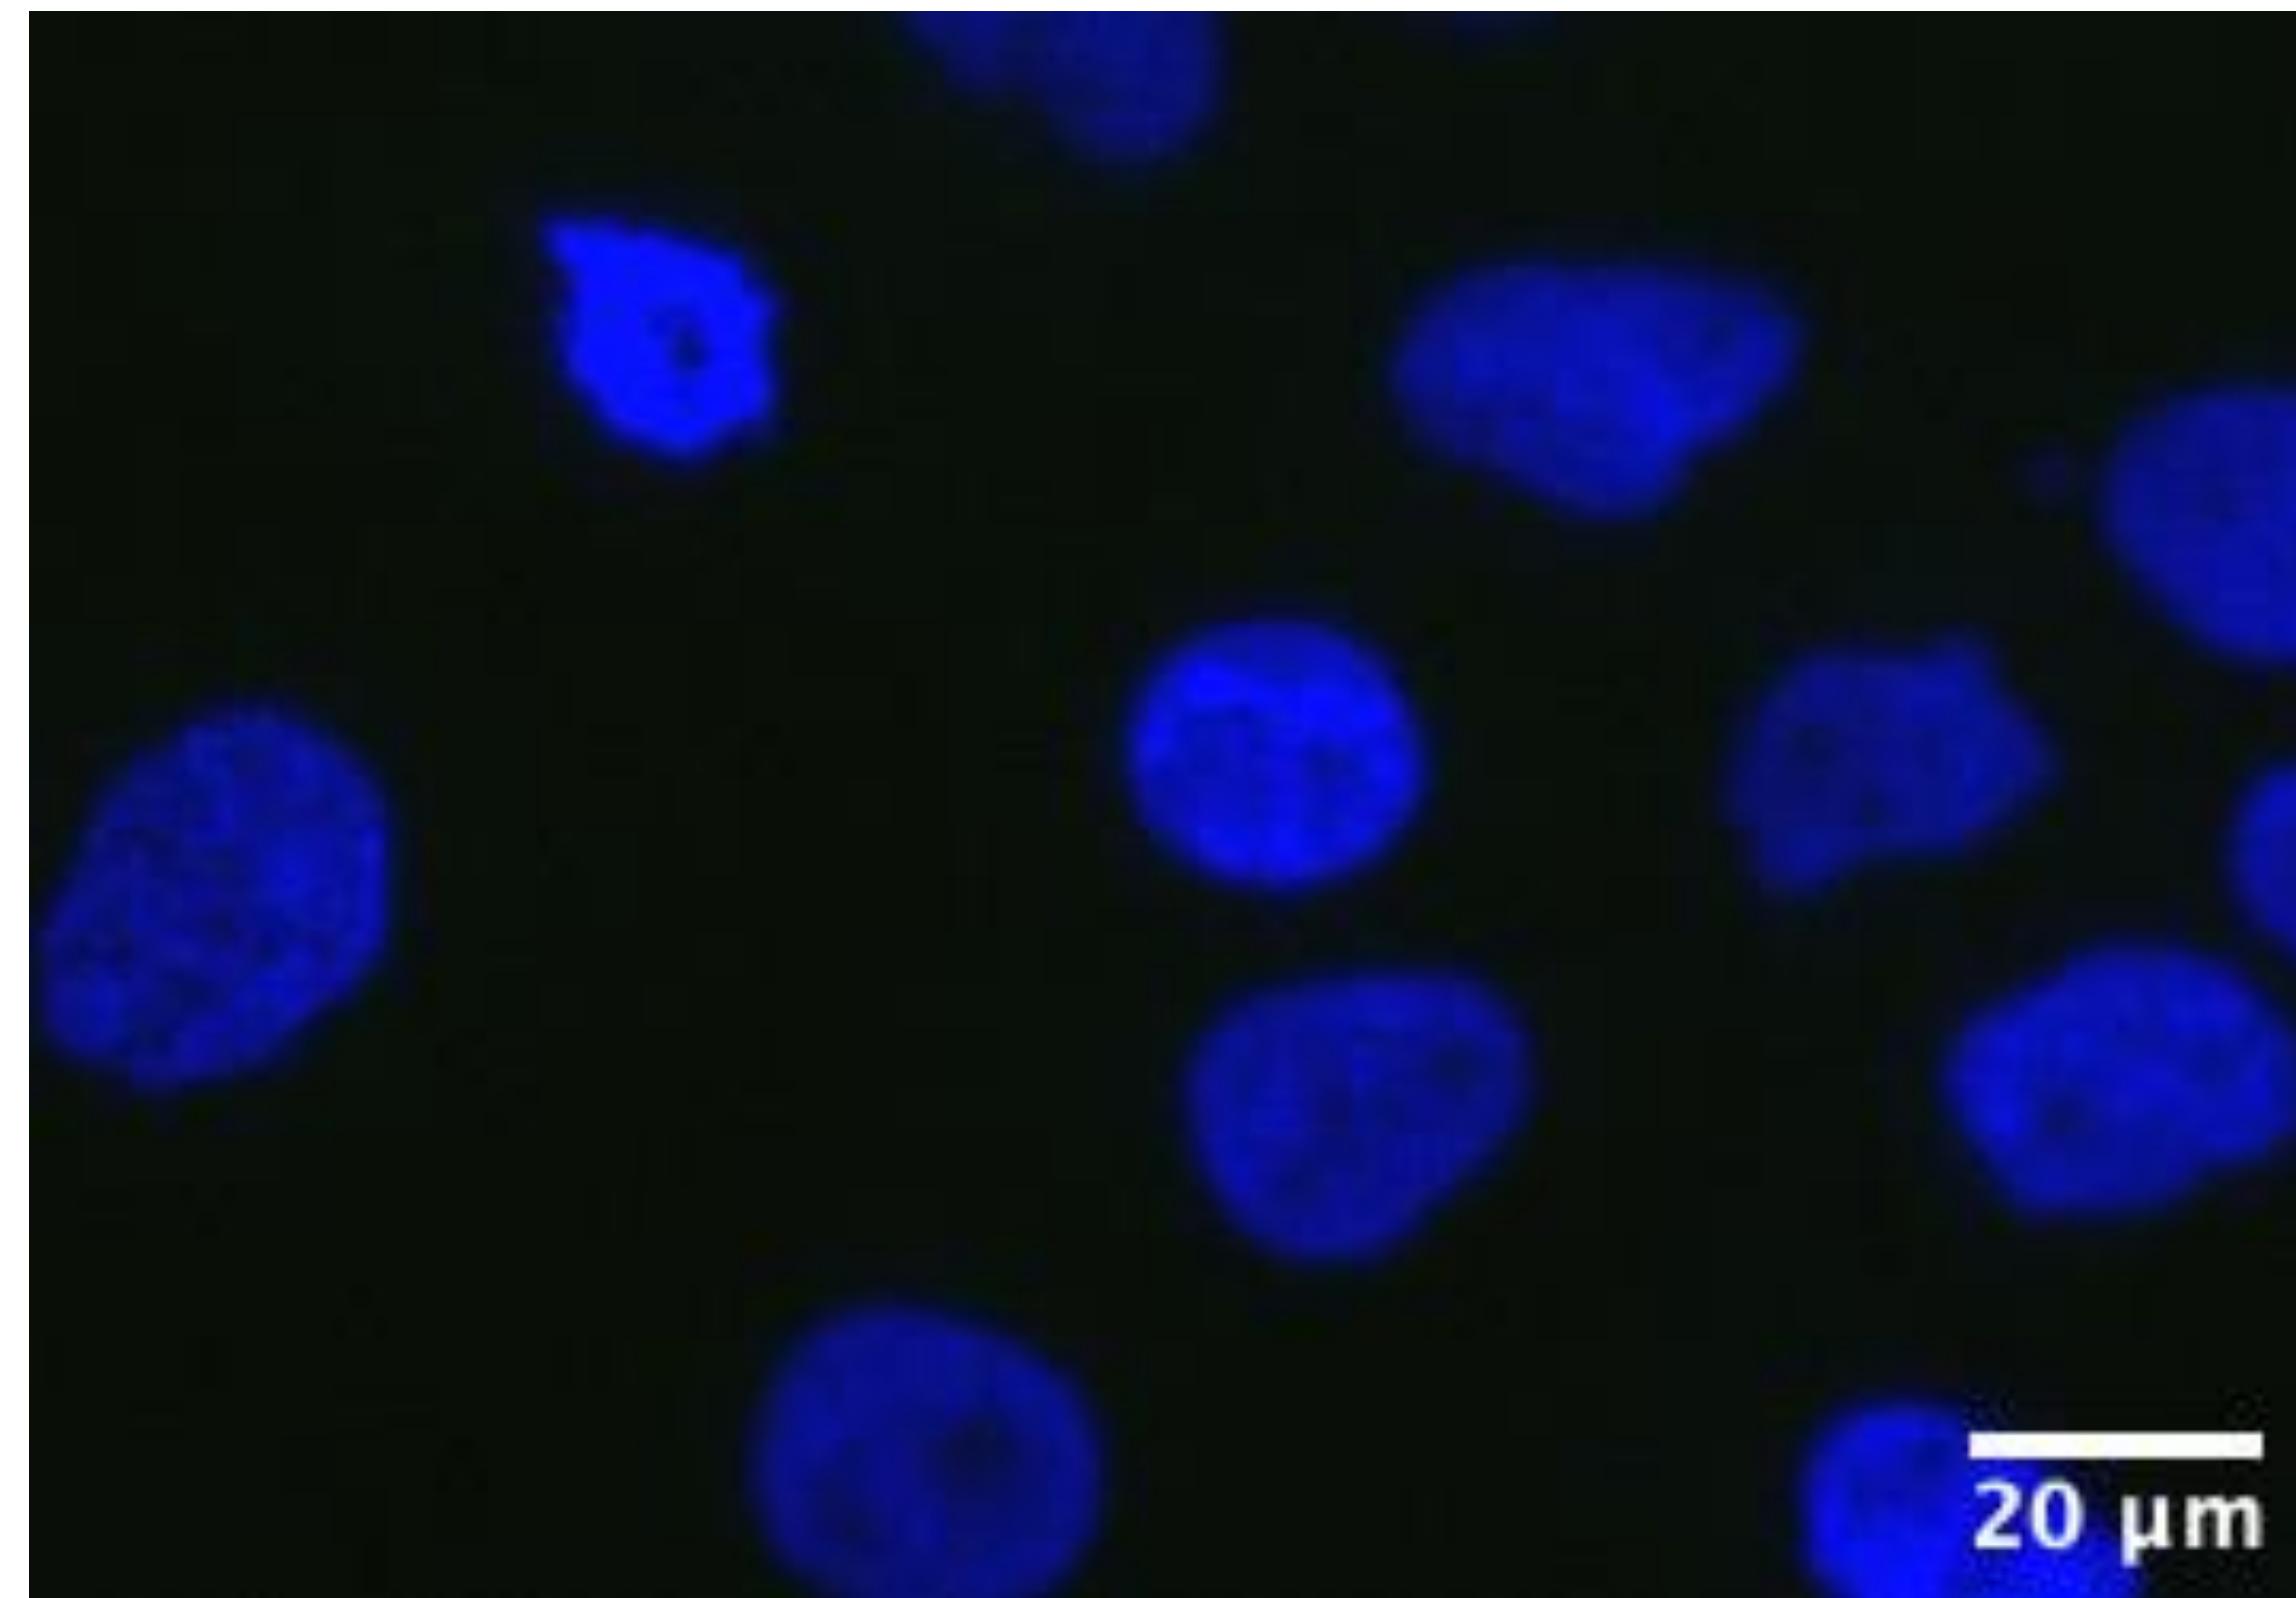

Unexposed

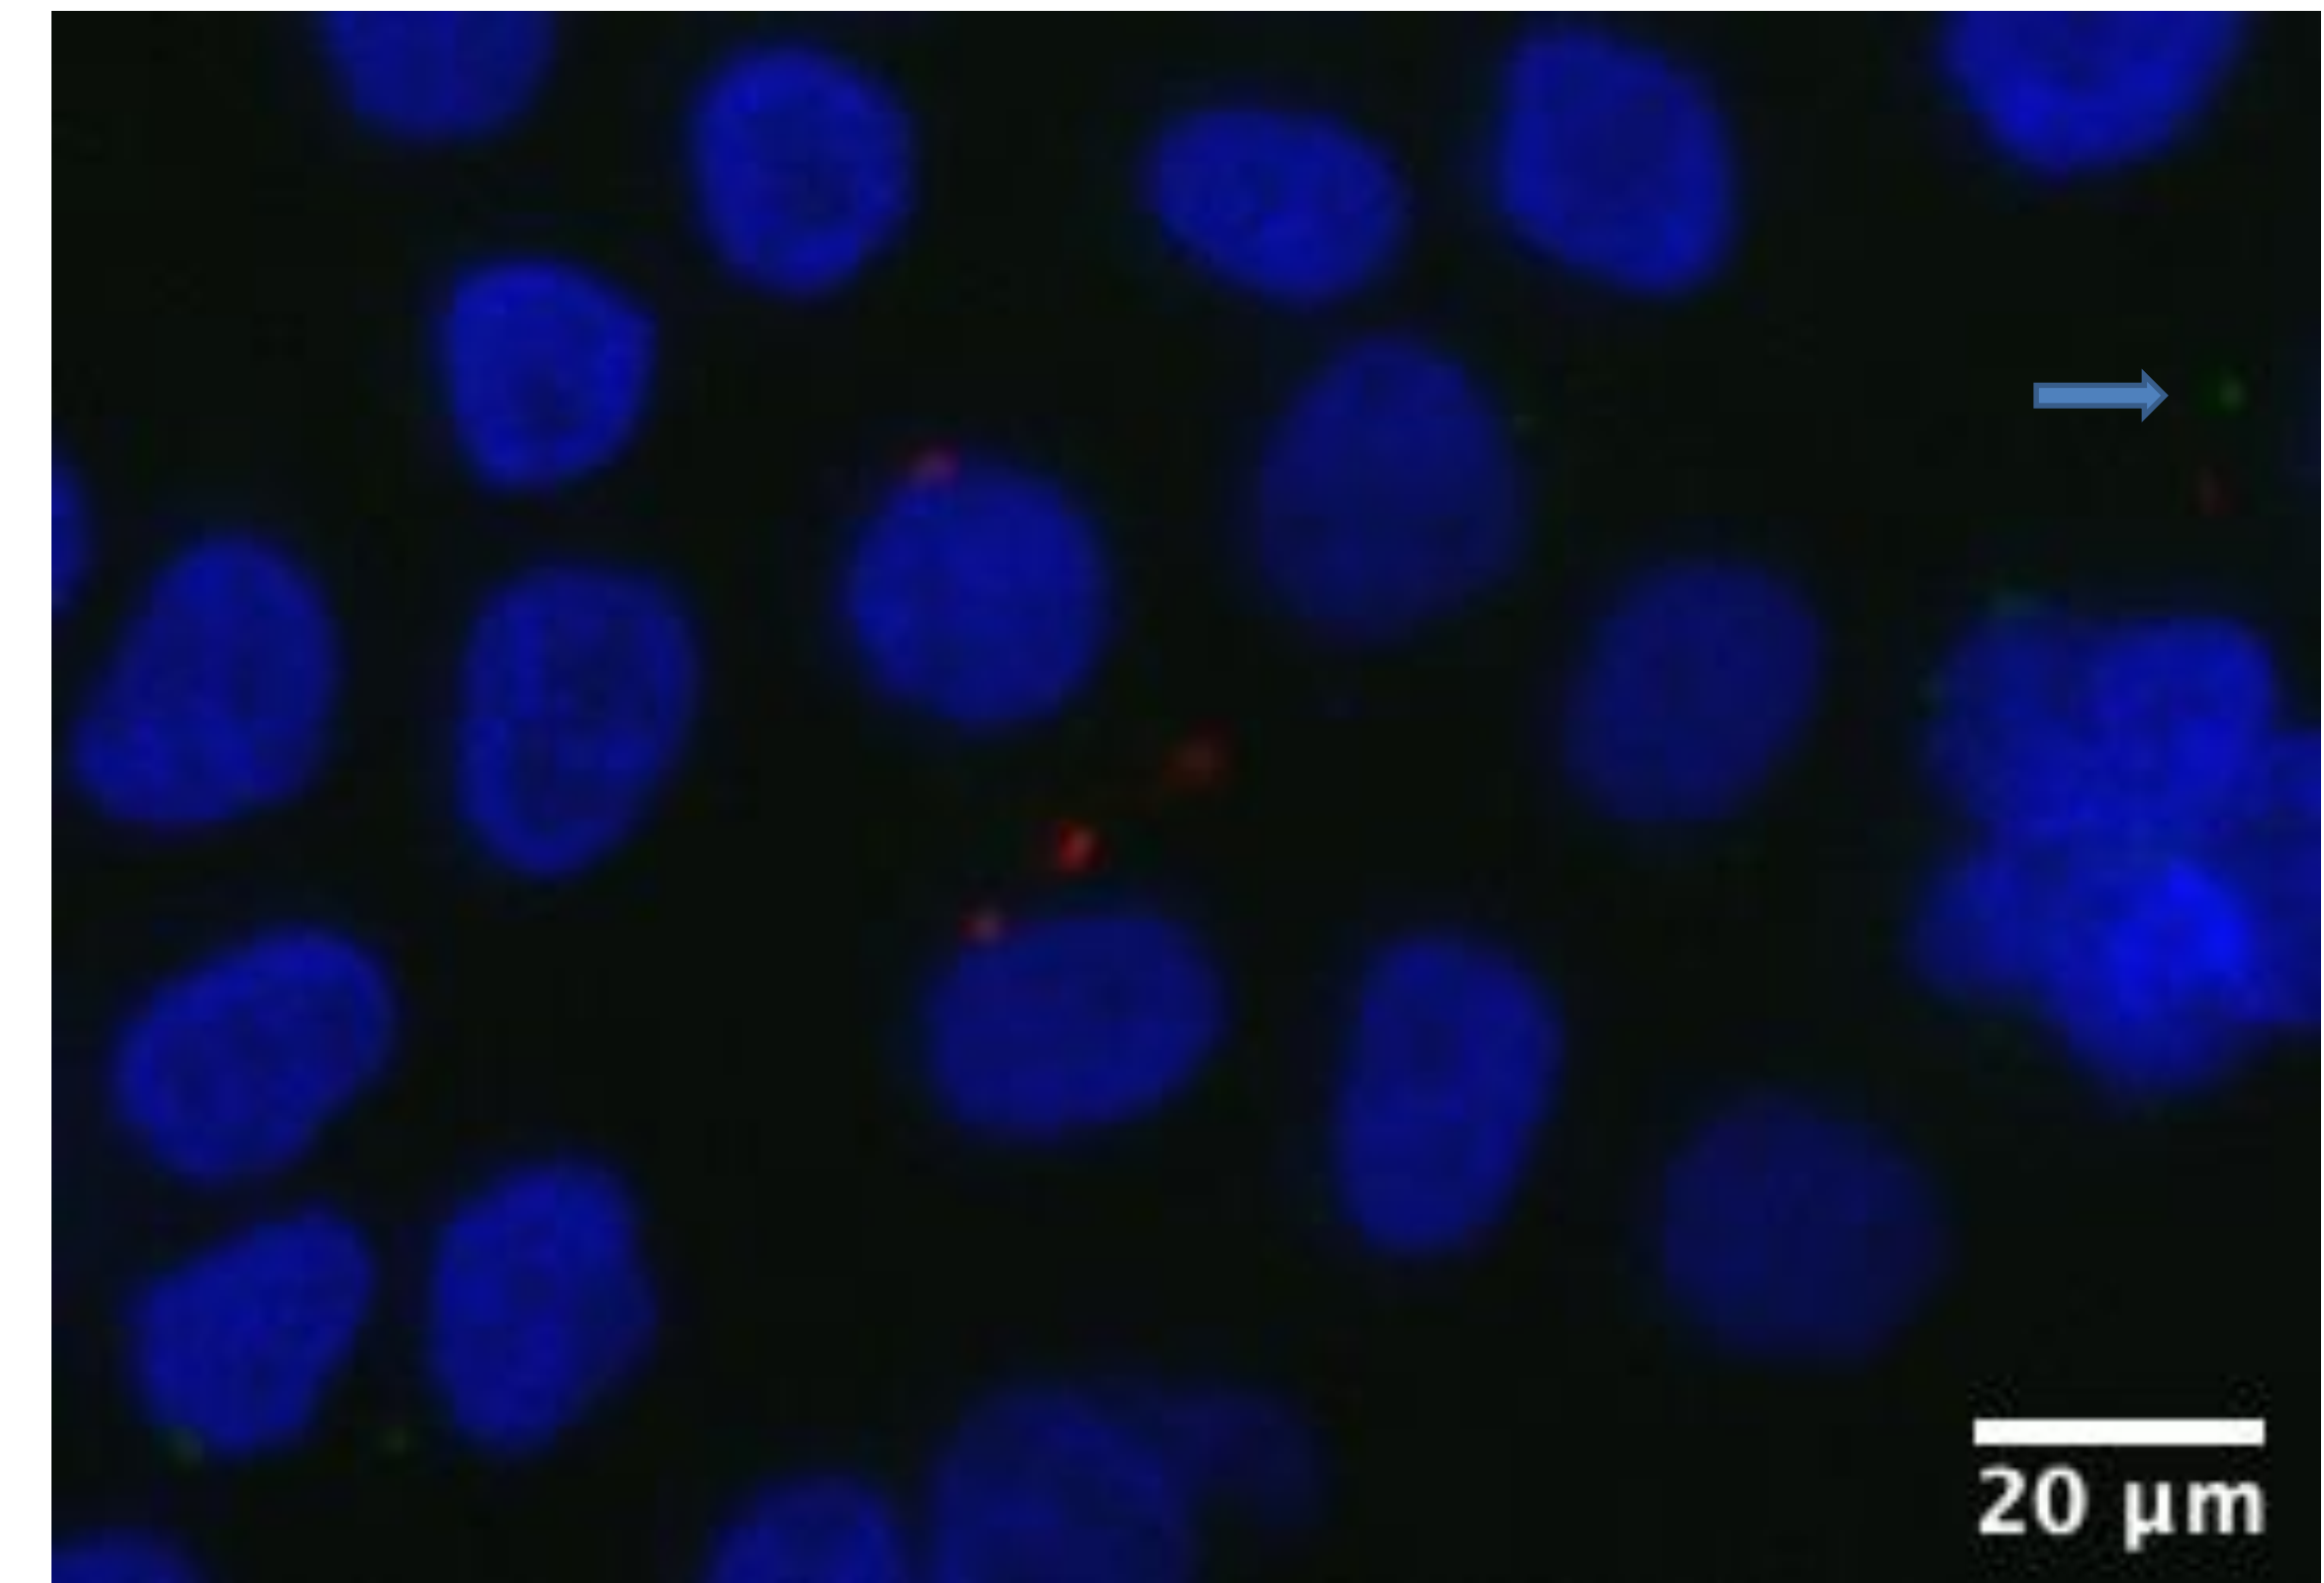

*N. flavescens*

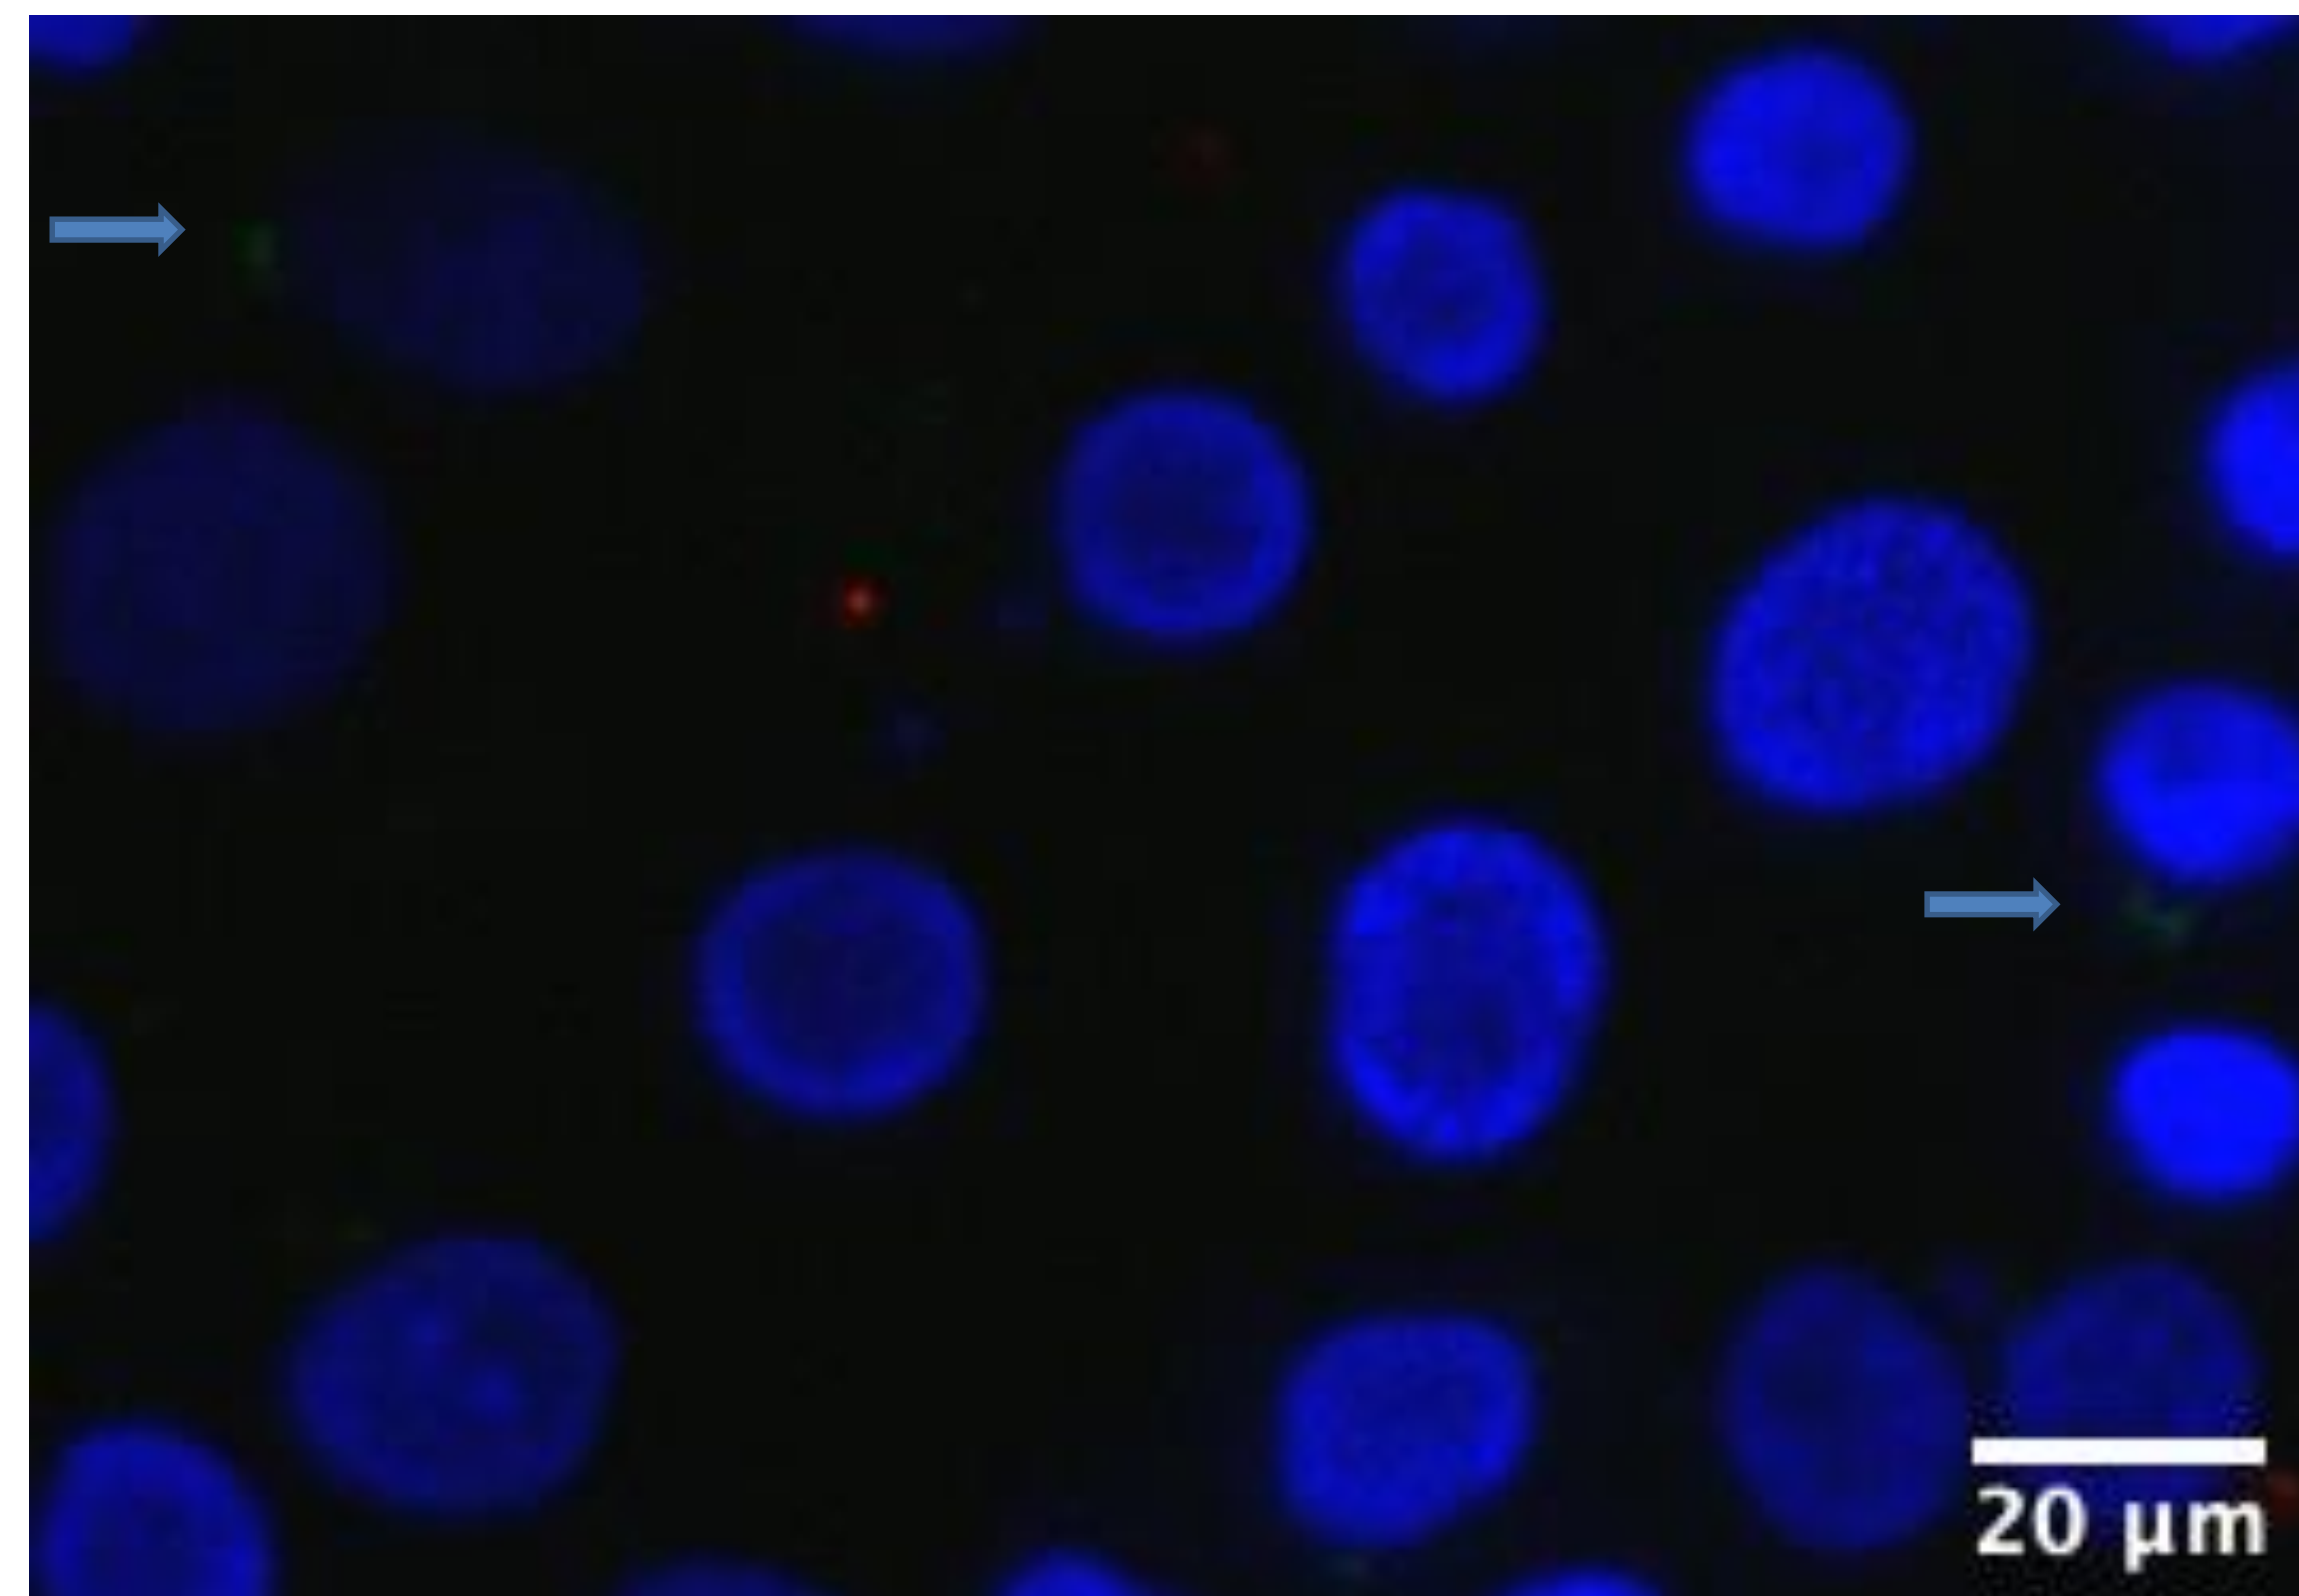

*H. parainfluenzae*

## Color scheme

Blue : nucleus

Green : Intracellular bacteria

Red: Extracellular bacteria

Arrows in the images are pointing to intracellular bacteria with green stain

# Supplementary Figure 18. Effect of bacterial lysates on gene expression in CAL27

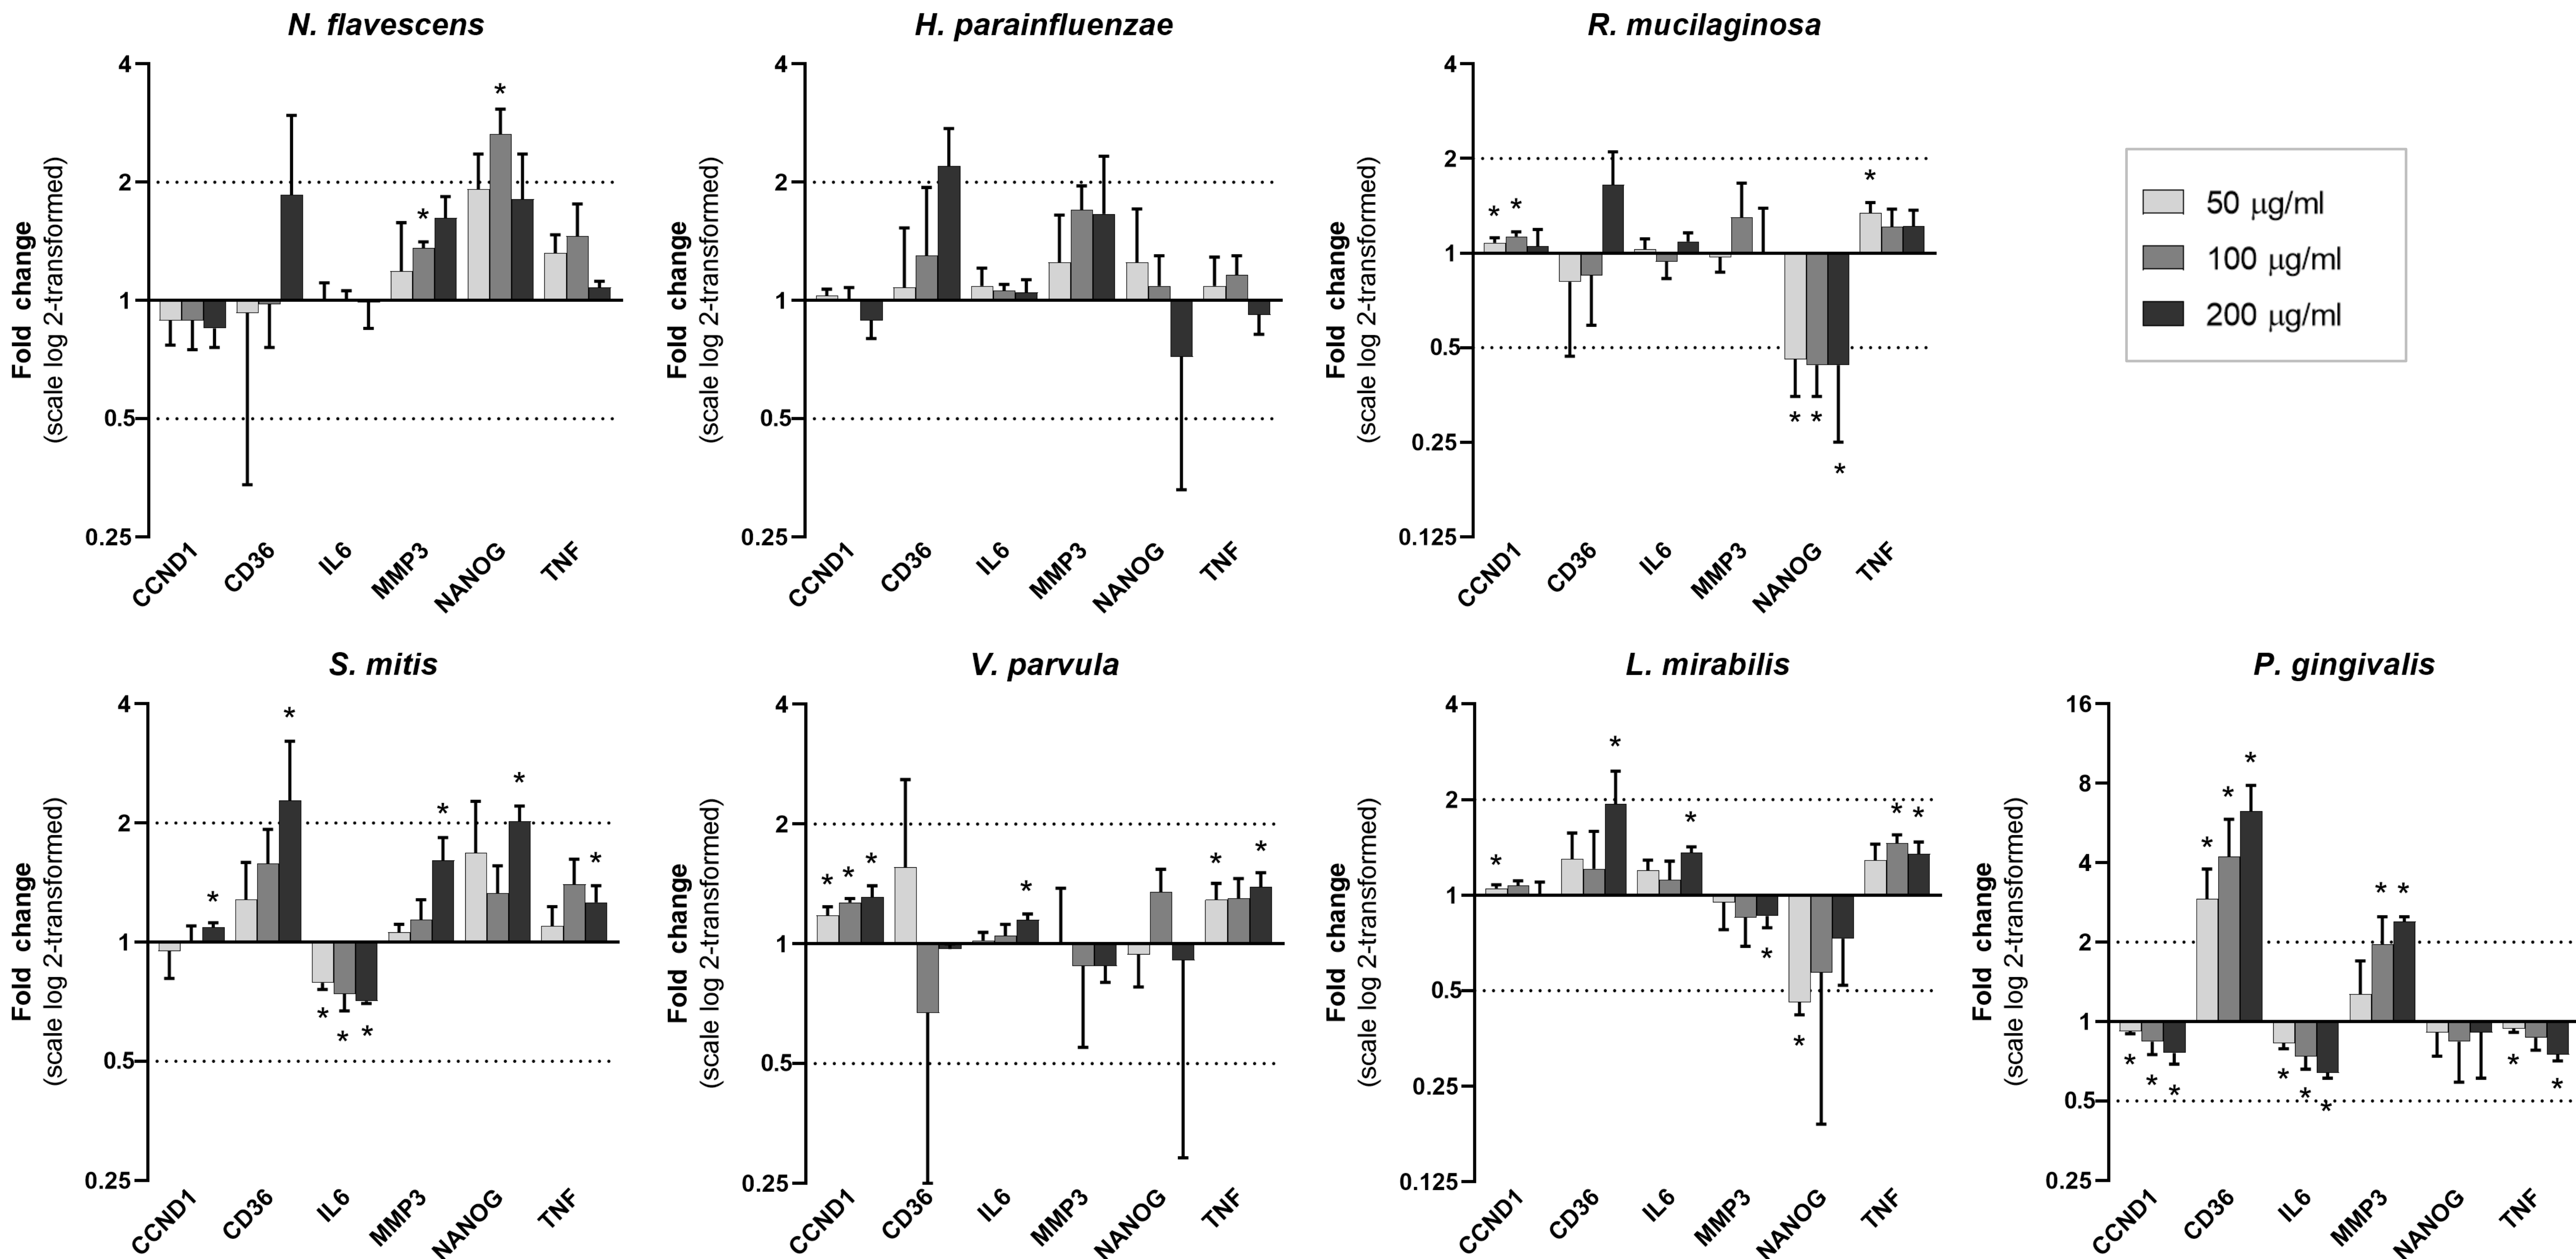

\* Significant difference relative to control ( P< 0.05)



# Supplementary Figure 19. Effect of bacterial lysates on gene expression in SCC25

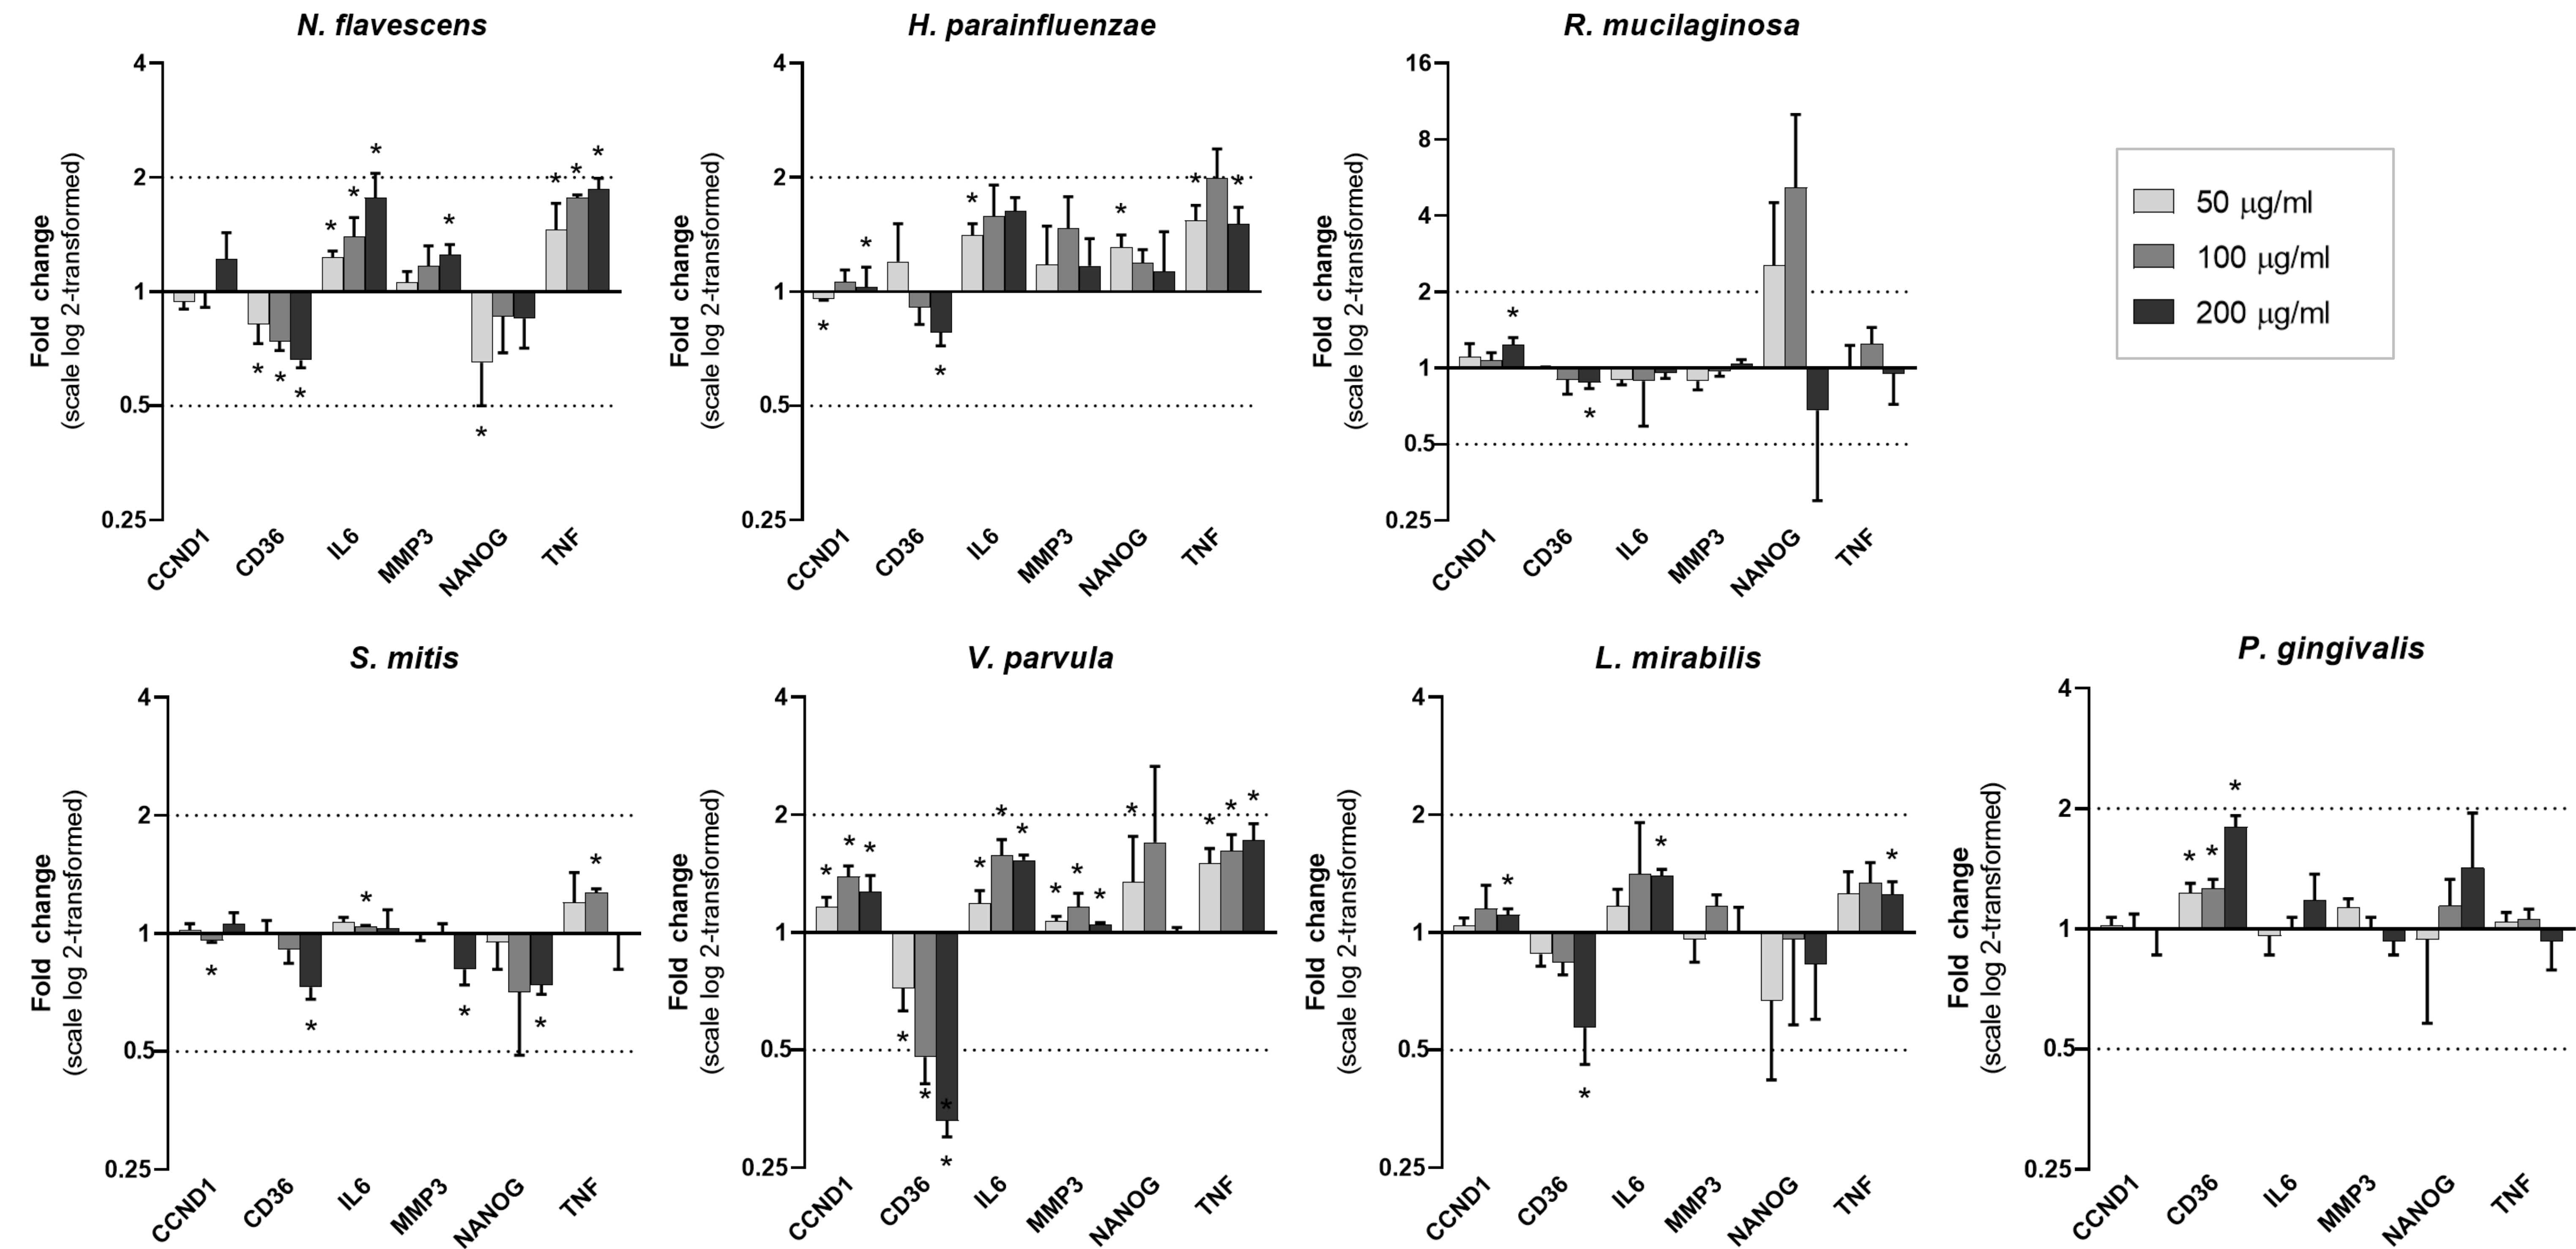

\* Significant difference relative to control ( P< 0.05)

# Supplementary Figure 20. Effect of bacterial lysates on gene expression in SCC4

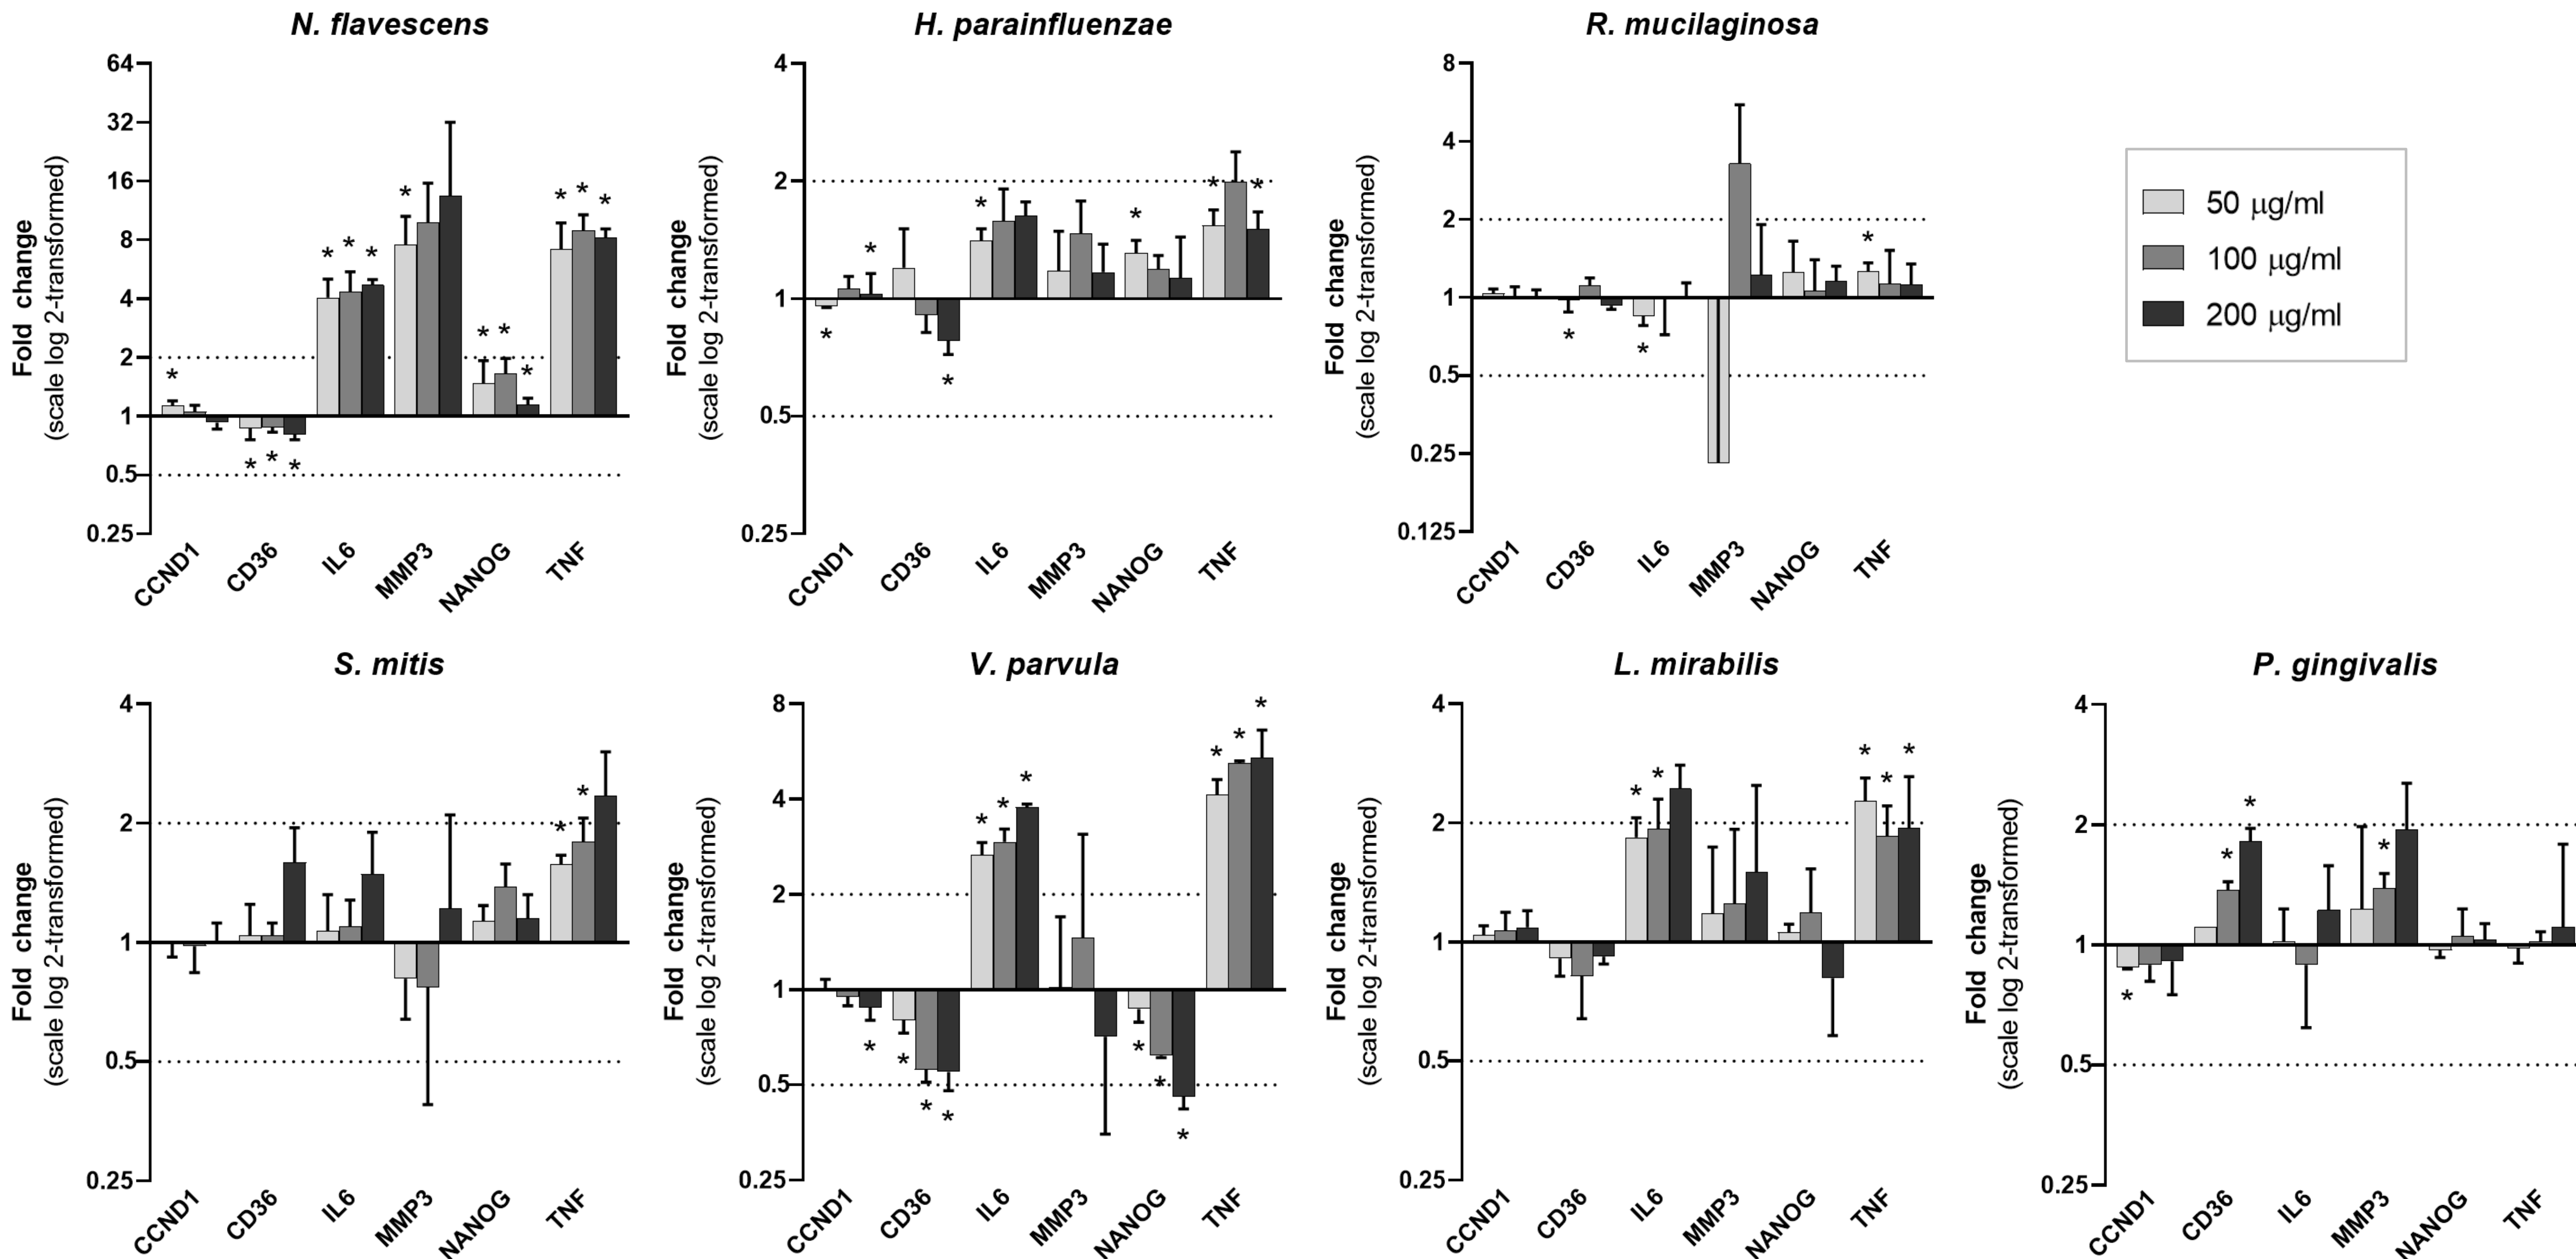

\* Significant difference relative to control ( P < 0.05)

Supplementary Figure 21. Effect of cocultures with bacteria on gene expression in CAL27

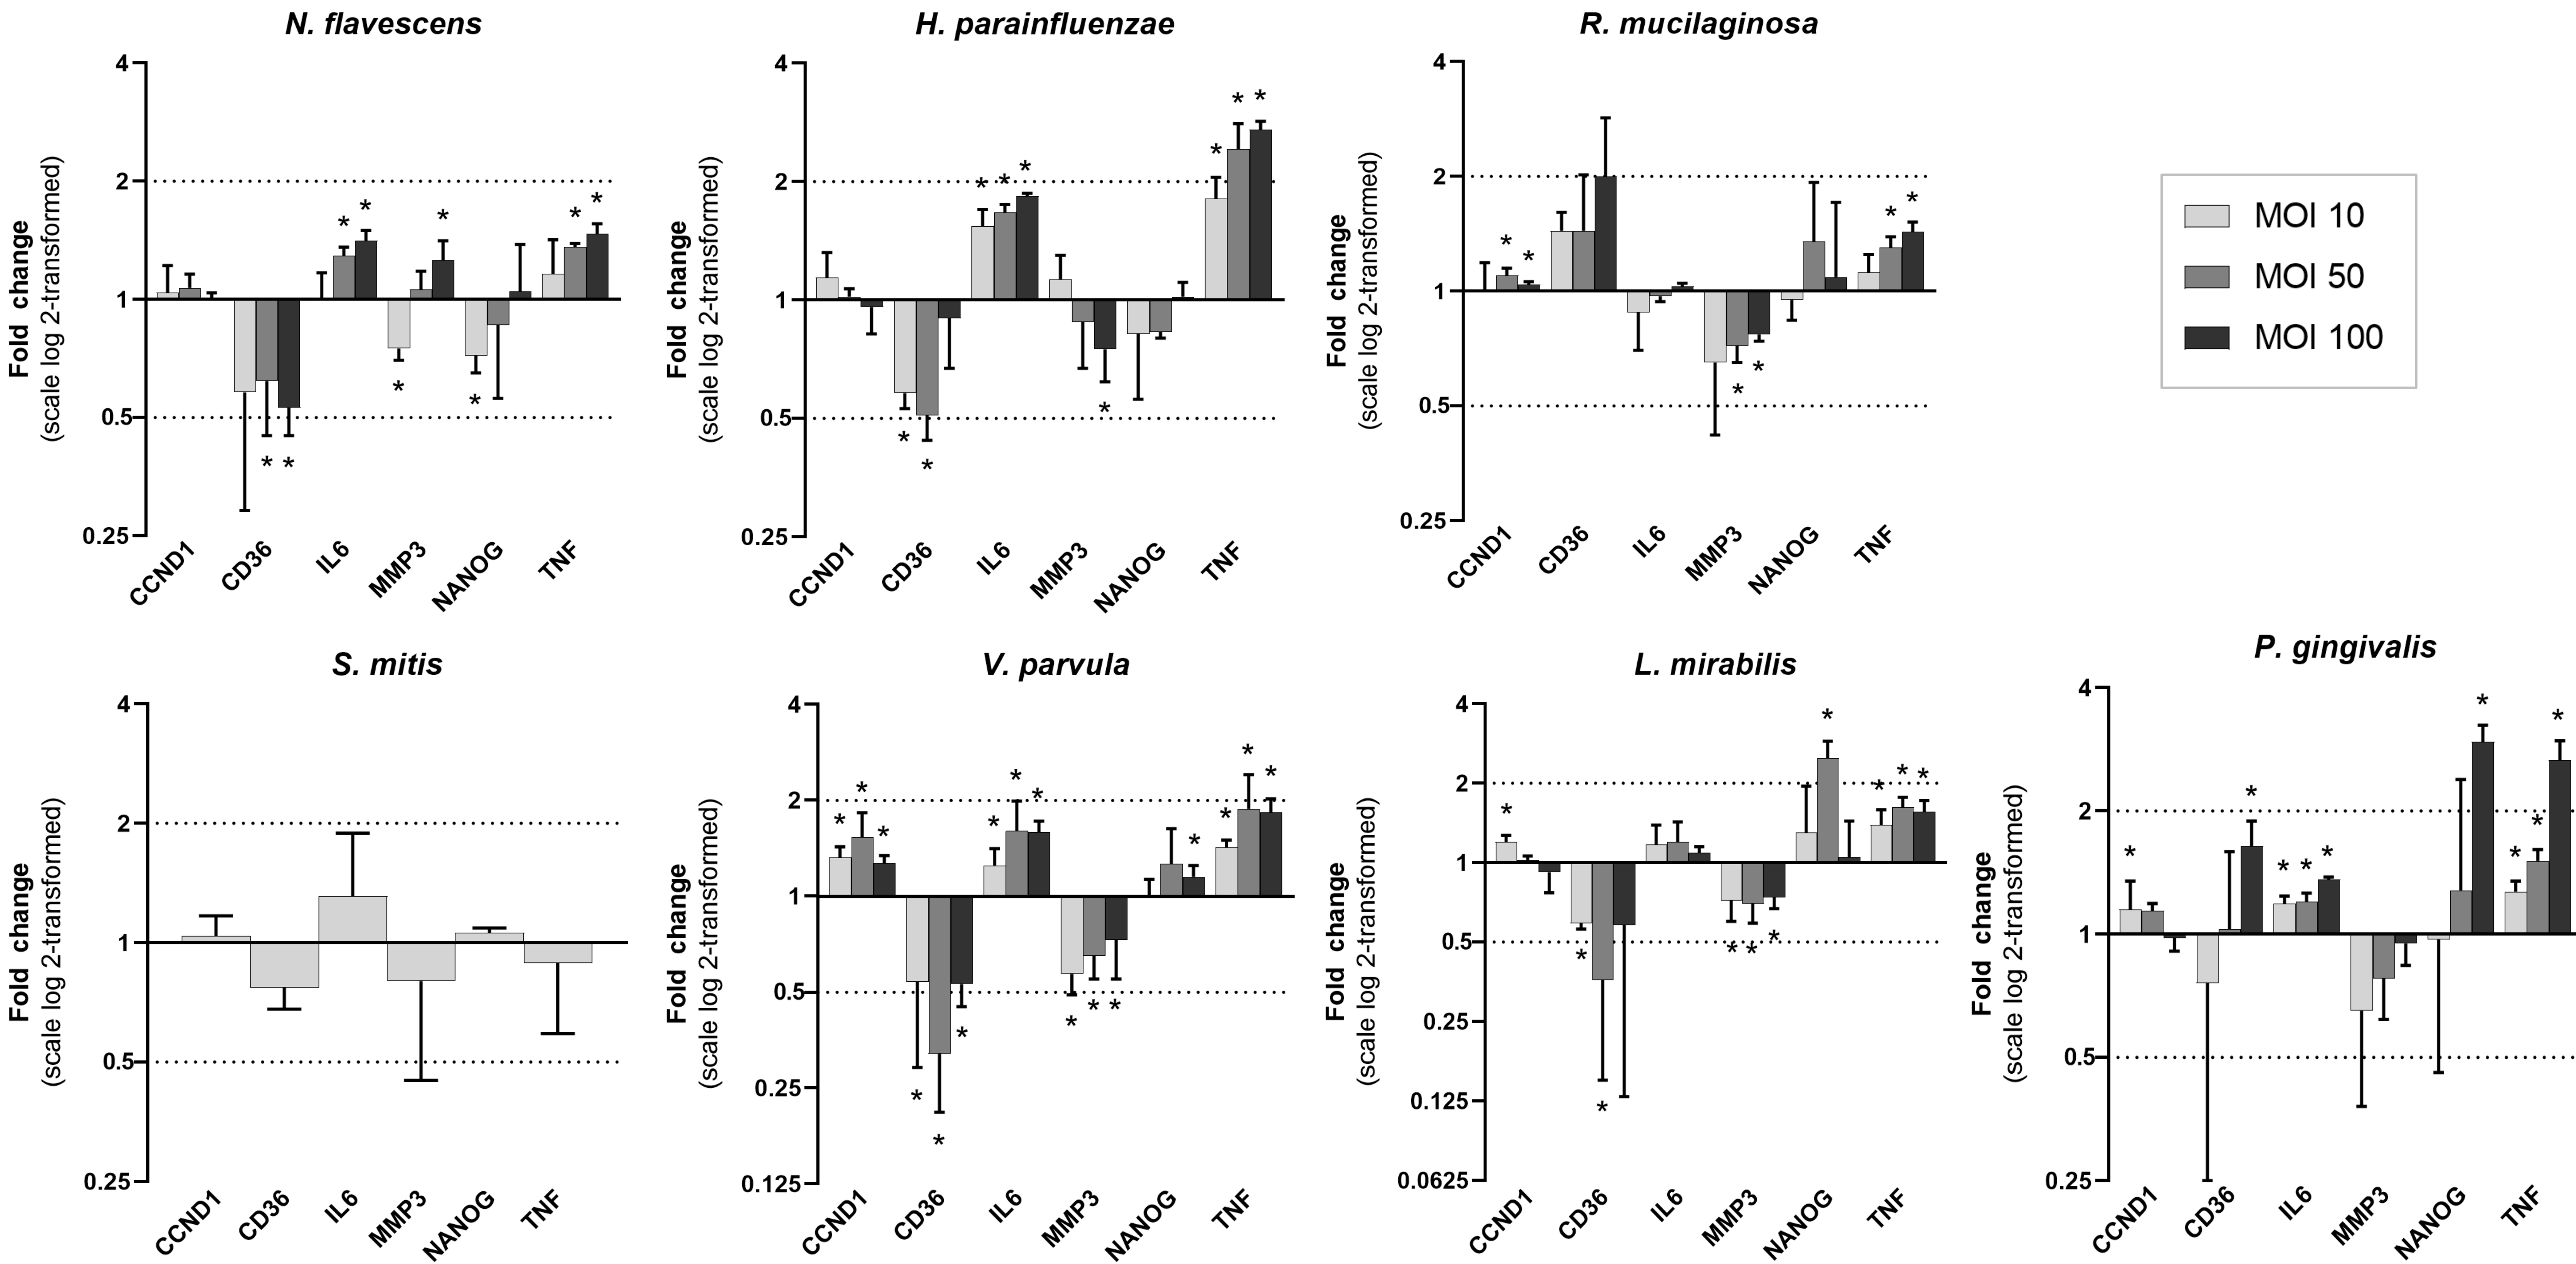

\* Significant difference relative to control ( P< 0.05)

Supplementary Figure 22. Effect of cocultures with bacteria on gene expression in SCC25

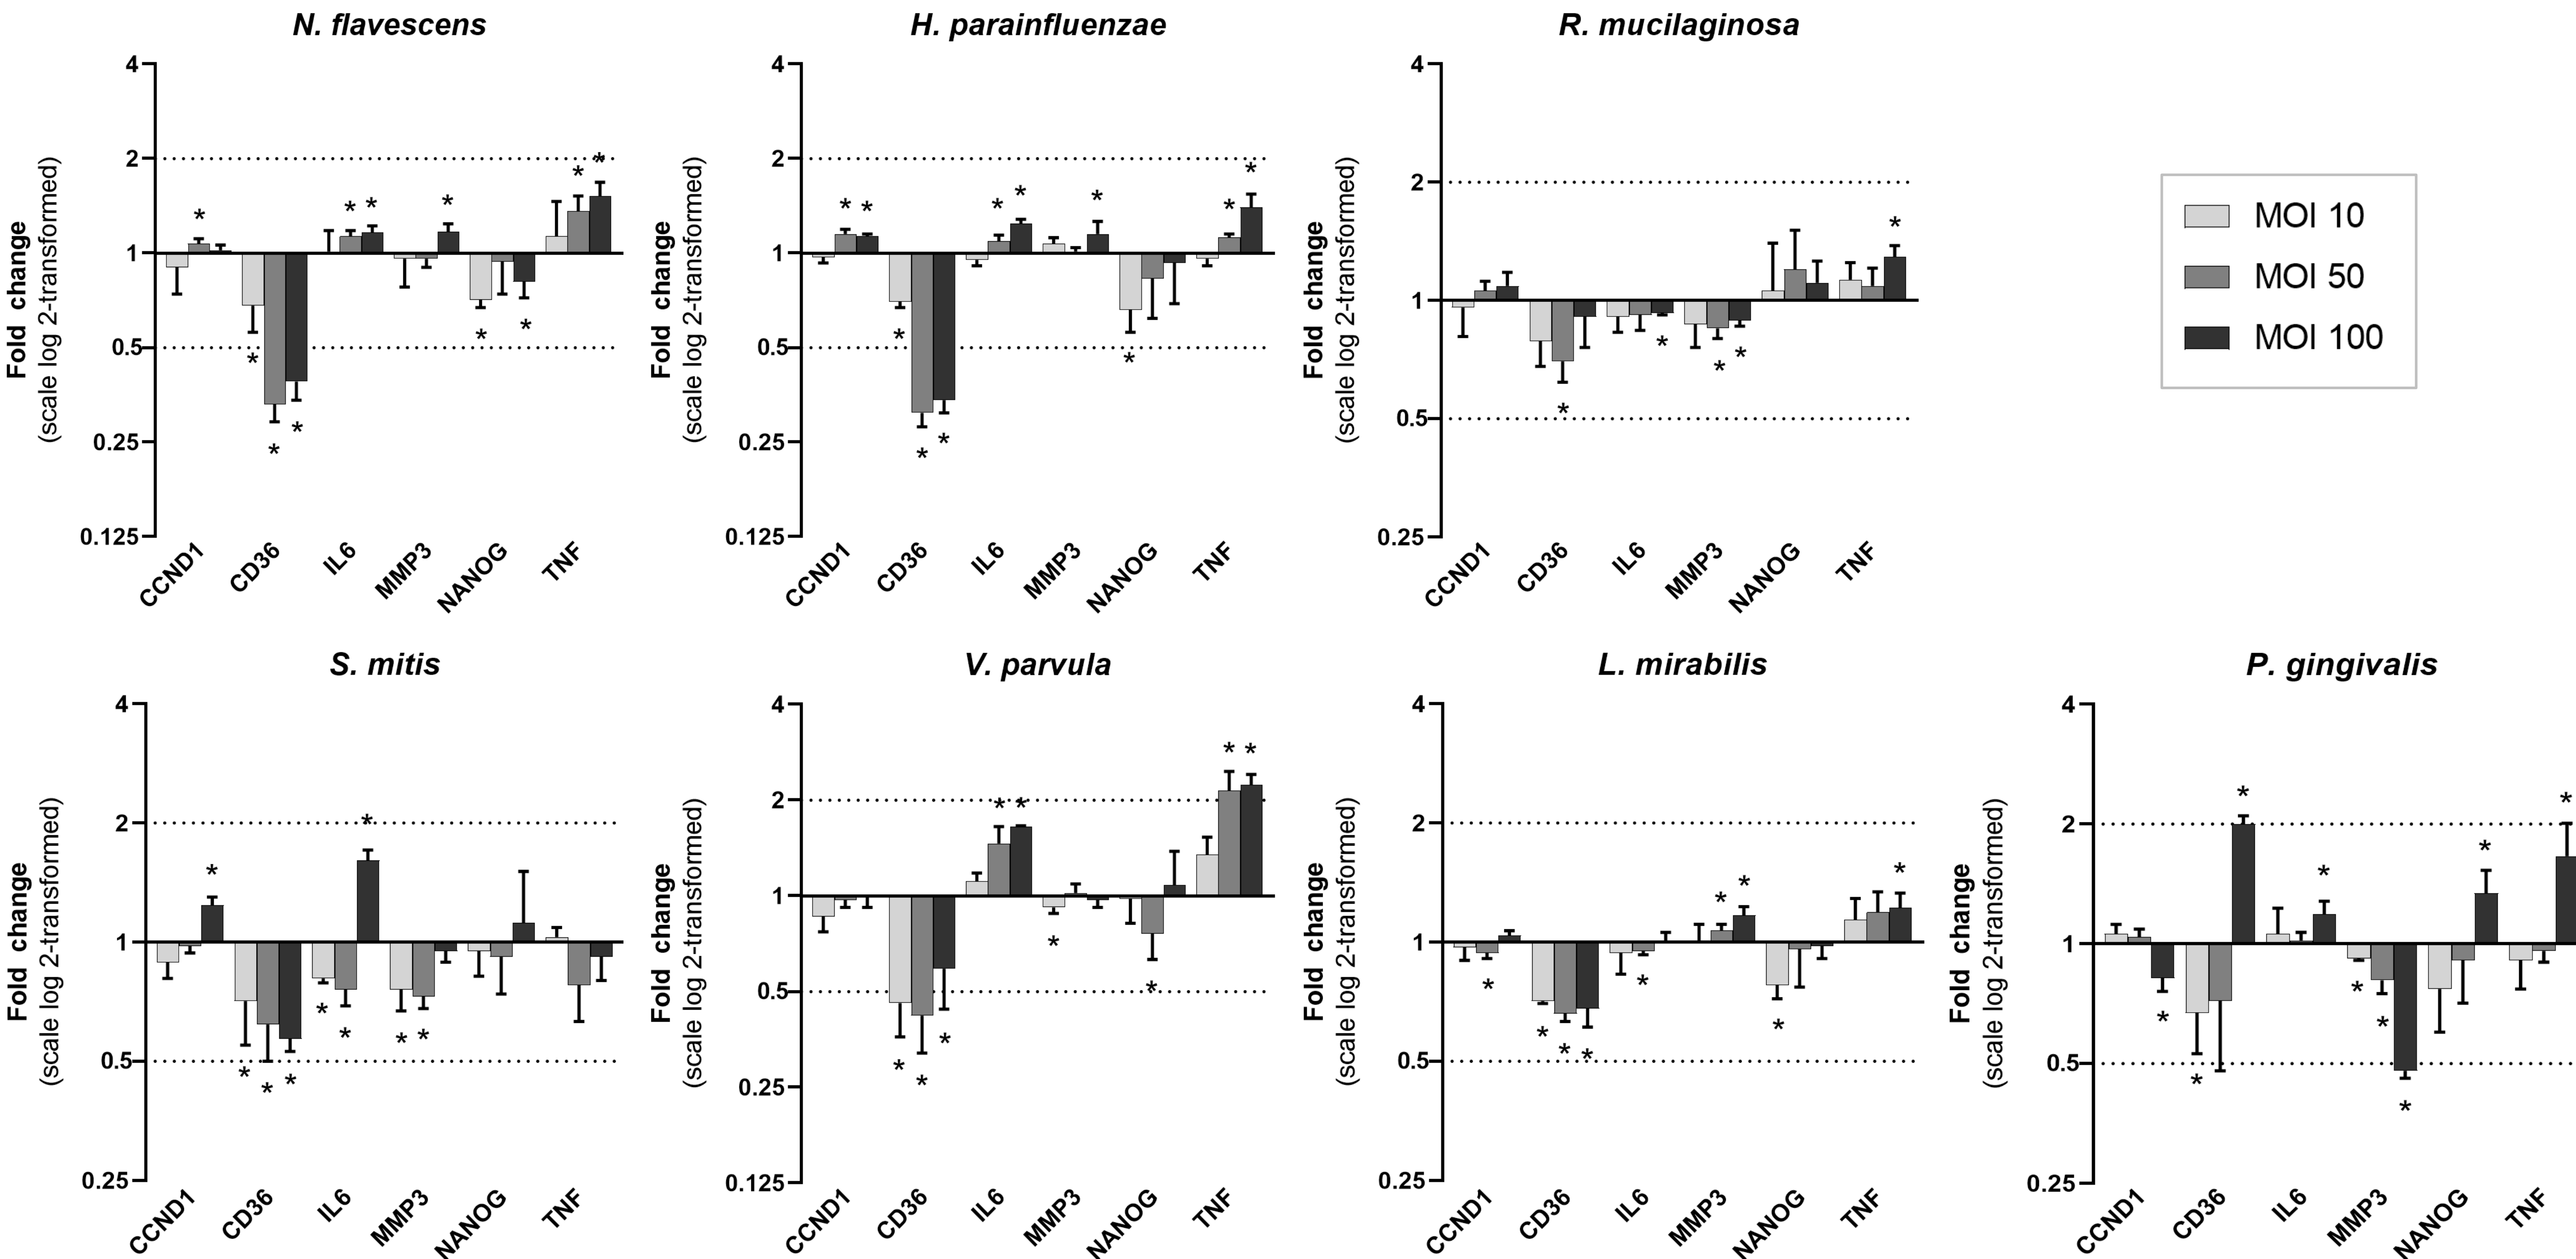

\* Significant difference relative to control ( P < 0.05)



Supplementary Figure 23. Effect of cocultures with bacteria on gene expression in SCC4

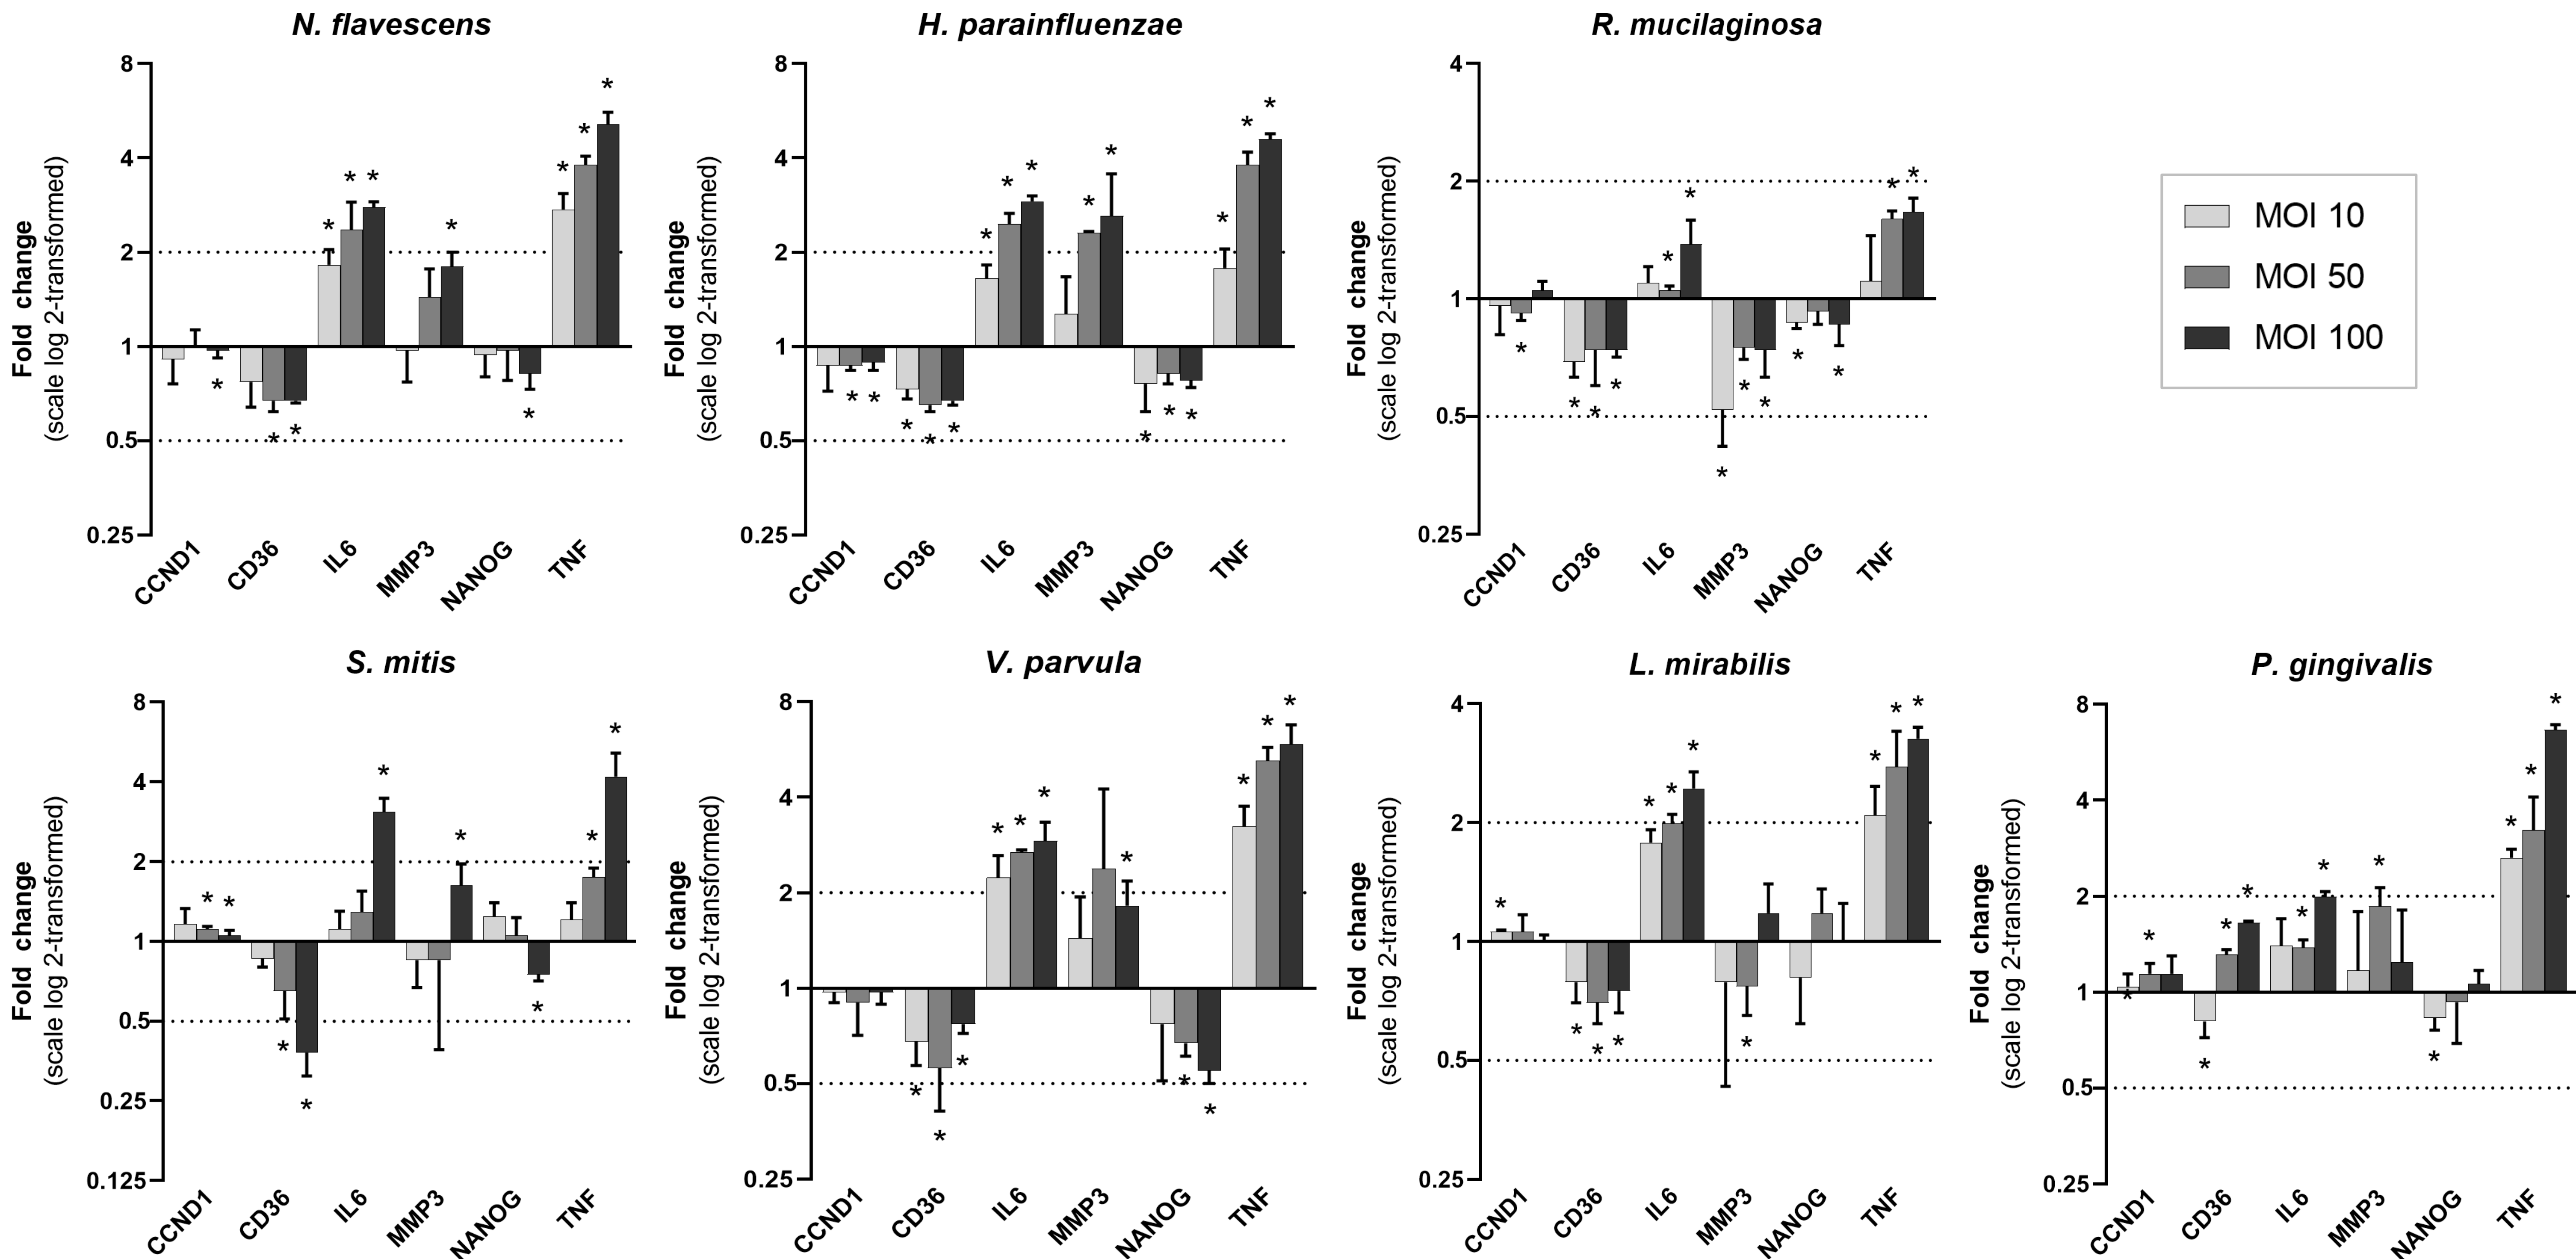

\* Significant difference relative to control ( P < 0.05)

Supplementary Figure 24. Effect of exposure to bacteria at MOI 100 on IL6 and TNF $\alpha$  concentrations in culture supernatant

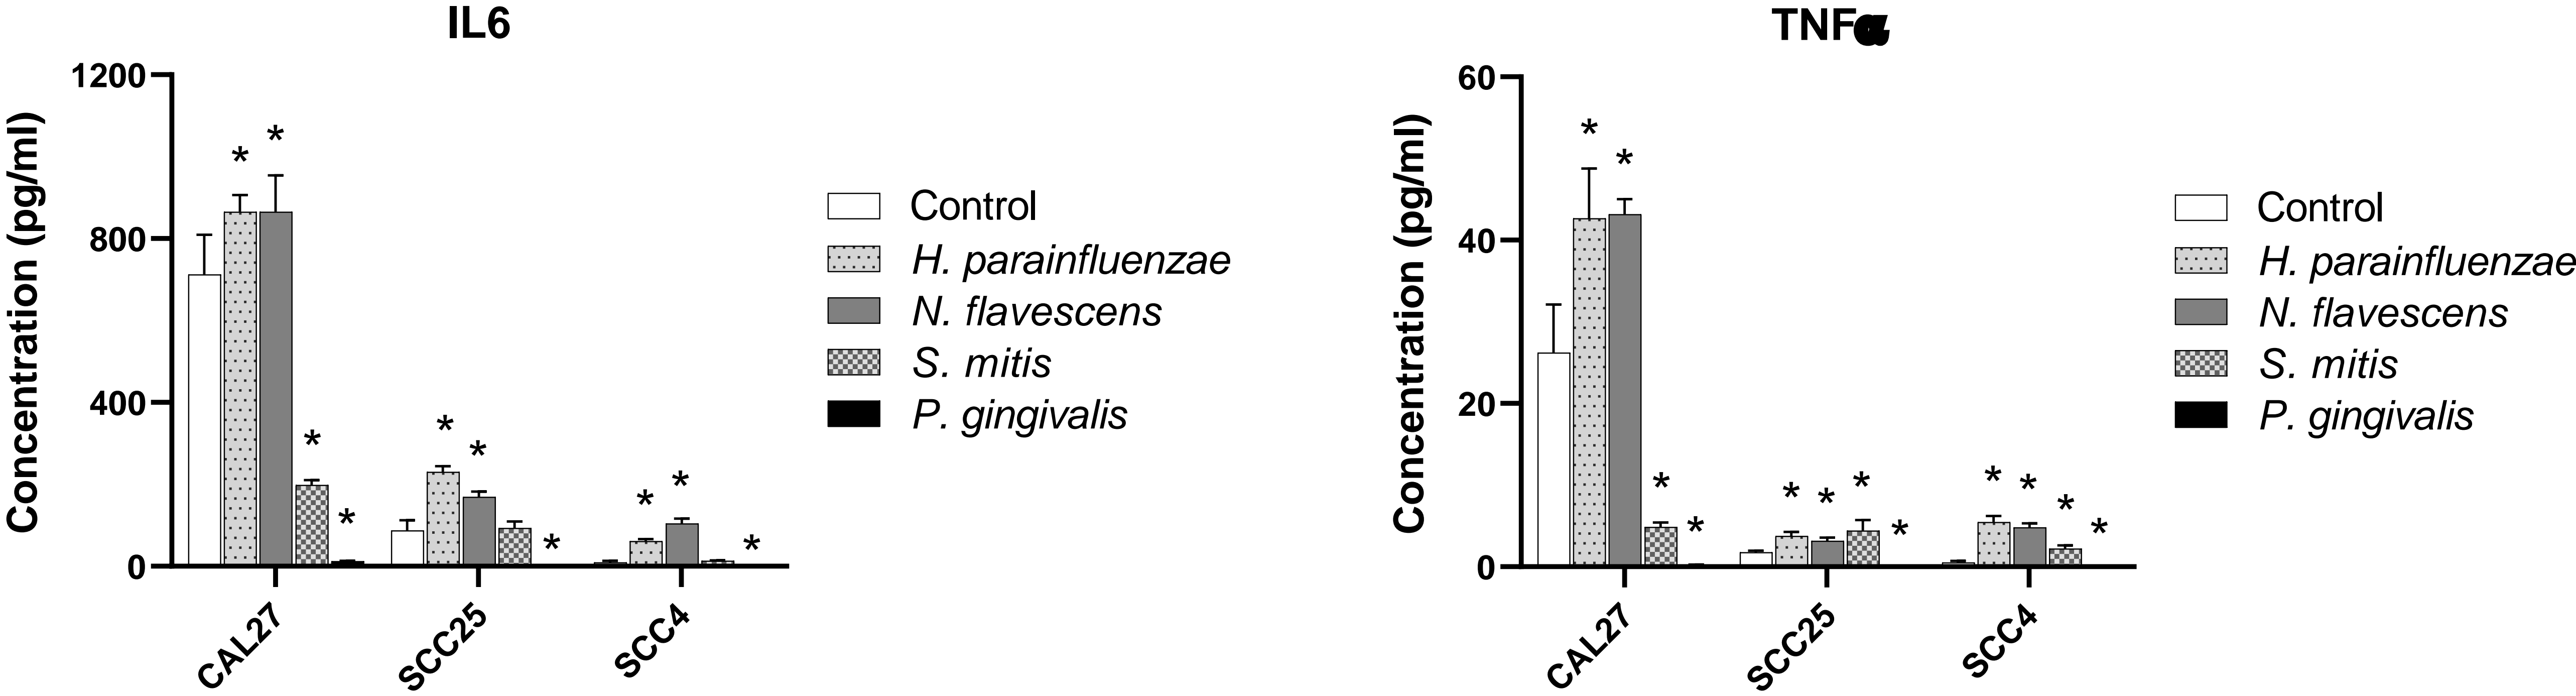

\* Significant difference relative to control ( P< 0.05)
